# Supplementary material for: The mini-IDLE 3D biomimetic culture assay enables interrogation of mechanisms governing muscle stem cell quiescence and niche repopulation
Source: eLife. 2022 Dec 20;11:e81738. doi: 10.7554/eLife.81738 (PMC9904761; doi:10.7554/eLife.81738)
Supplement: Figure 1—figure supplement 1—source data 1. — Data for subpanels separated into tabs. [file elife-81738-fig1-figsupp1-data1.xlsx]

## Sheet: Fig1. S1B
	10,000 cells	25,000 cells	50,000 cells
SAA coverage	57.079	60.107	62.37
	45.709	71.294	48.485
	45.583	74.702	54.896
	49.128	64.169	58.751
	48.15	75.549	68.617
	40.681	54.521	73.231
	40.942	60.845	77.657
	55.053	49.042	58.97
	43.053	54.5111	79.767
	31.516	53.535	60.935
	14.948	56.345	66.0643
	44.102	54.053	70.233
*values represent technical replicates from all biological replicates
