# Supplementary material for: The mini-IDLE 3D biomimetic culture assay enables interrogation of mechanisms governing muscle stem cell quiescence and niche repopulation
Source: eLife. 2022 Dec 20;11:e81738. doi: 10.7554/eLife.81738 (PMC9904761; doi:10.7554/eLife.81738)
Supplement: Figure 1—figure supplement 2—source data 1. — Data for subpanels separated into tabs. [file elife-81738-fig1-figsupp2-data1.xlsx]

## Sheet: Fig1. S2C
	3D				2D
Day	5	8	12		5	8	12
	82.367	74.674	75		89.787	86.731	67.617		SAA coverage
	68.194	90.042	80.439		81.724	87.781	76.488
	71.986	85.972	84.048		92.4	90.757	78.056
	89.23	88.714	96.408		85.02	88.772	69.361
	80.548	74.727	81.663		92.436	87.085	73.746
	88.762	82.003	77.416		79.937	84.99	75.387
		85.388	79.178		77.224	73.294	68.338
		53.341	92.919		74.605	75.387	78.629
		76.76	94.156		81.737	75.149	66.058
*values represent technical replicates from all biological replicates

## Sheet: Fig1. S2D
	3D				2D
Day	5	8	12		5	8	12
	5.844	5.844	10.0647		6.818	18.1813	23.376		myoballs / 100um2
	1.948	0.649333	18.8307		7.14267	13.9607	20.1293
	5.51933	4.54533	0.649333		3.24667	10.0647	15.4153
	1.29867	9.09067	0.649333		9.41533	10.3893	11.688
	2.59733	0.974	3.24667		3.896	16.2333	13.636
	8.11667	11.0387	3.896		4.87	8.87	12.1687
		5.844	0.974		2.27267	6.49333	5.51933
		4.22067	0.974		1.29867	4.22067	11.6233
		4.22067	4.22067		0.649333	12.1687	4.22067
*values represent technical replicates from all biological replicates

## Sheet: Fig1. S2E
	3D				2D
Day	5	8	12		5	8	12
	47.2884	62.4417	56.6157		43.6137	67.6865	51.7992		Z-line fraction
	54.0356	52.4183	57.917		43.376	56.8705	49.2138
	64.0947	53.0369	53.0477		50.1358	52.8628	41.4431
	57.0994	48.7471	53.088		36.1331	56.1064	46.159
	54.0232	49.9764	53.5546		42.3362	53.3124	46.6084
	55.5499	45.168	51.0506		50.3085	37.7529	47.0099
		47.0733	46.4309		42.0817	53.7511	52.4069
		45.9176	47.659		43.3979	48.6677	40.0879
		51.9236	48.3088		41.1483	49.193	51.1459
*values represent technical replicates from all biological replicates

## Sheet: Fig1. S2F
	3D				2D
Day	5	8	12		5	8	12
	1.22014	1.34921	1.20585		1.34156	1.53223	1.20656		Mean continuous z-line fraction
	1.17432	1.294	1.22722		1.22565	1.36347	1.21624
	1.15579	1.24325	1.16544		1.24166	1.26202	1.55421
	1.22325	1.2611	1.22362		1.23901	1.30063	1.28184
	1.36218	1.23438	1.28377		1.59516	1.25698	1.34621
	1.26849	1.20759	1.27477		1.29371	1.19029	1.20451
		1.17498	1.14509		1.34794	1.29674	1.28712
		1.15593	1.18023		1.23029	1.25132	1.56511
		1.20899	1.23117		1.18462	1.27221	1.27246
*values represent technical replicates from all biological replicates

## Sheet: Fig1. S2G
	3D				2D
Day	5	8	12		5	8	12
	2.2	1.8	2.58		1.86	1.8	2.045		sarcomere length
	2.24	1.96	2.49		1.885	1.83	1.825
	2.2	2.35	2.425		2.12	1.91	1.7
	2.43	2.27	2.28		2.01	1.91	1.895
	2.15	2.255	2.08		1.895	1.93	2.12
	2.22	2.37	2.325		2.06	2.33	2.04
		2.315	2.395		2.03	2.17	2
		2.18	2.33		2.28	2.32	1.79
		2.12	2.16		2.315	1.915	2.22
*values represent technical replicates from all biological replicates
