# Supplementary material for: The mini-IDLE 3D biomimetic culture assay enables interrogation of mechanisms governing muscle stem cell quiescence and niche repopulation
Source: eLife. 2022 Dec 20;11:e81738. doi: 10.7554/eLife.81738 (PMC9904761; doi:10.7554/eLife.81738)
Supplement: Figure 1—source data 1. — Data for subpanels separated into tabs. [file elife-81738-fig1-data1.xlsx]

## Sheet: Fig. 1D
Day	SAA coverage (%)							Nuclear fusion index (%)
2	24.0455	24.1295	28.399	39.0193				19.3862	12.3988	30.155
5	54.94	69.7292	75.921	66.45	56.9817			93.6394	89.3853	93.6752	94.4144	79.4338
10	65.242	81.019	67.086	61.4263	68.8513			92.4608	94.0001	96.709	94.2166	78.7419	80.2819
14	60.678	72.927	69.0313	70.4433	67.5613			71.8805	88.0669	91.1186	86.5557	82.0282
16	74.6563	63.0592	68.9293	69.8723				80.426	94.6355	88.3275
18	50.0285	53.0593	64.9683	53.8763				96.5487	90.0484	86.0252	82.5294
*values represent biological replicates

## Sheet: Fig. 1E
Day	OD (490nm)
2	0.600767	0.881233	0.892333	0.7704
5	0.531467	0.930367	0.650933	0.7854
10	1.03957	1.17487	0.916433
14	0.5574	0.929067	0.617267	0.9677
16	0.901845	0.934133	0.644667	0.6729
18	0.6311	0.3608	0.195867
*values represent biological replicates
