# Supplementary material for: The mini-IDLE 3D biomimetic culture assay enables interrogation of mechanisms governing muscle stem cell quiescence and niche repopulation
Source: eLife. 2022 Dec 20;11:e81738. doi: 10.7554/eLife.81738 (PMC9904761; doi:10.7554/eLife.81738)
Supplement: Figure 2—figure supplement 1—source data 1. — Data for subpanels separated into tabs. [file elife-81738-fig2-figsupp1-data1.xlsx]

## Sheet: Fig2. S1C
	1 DPE
Percentage Pax7+	90.4737
	100
	95.3846
	90.1961
	91.7526
	96.7213
	94.5946
	93.75
	91.3793
	92.5926
	94.0299
*values represent technical replicates from all biological replicates
