# Supplementary material for: The mini-IDLE 3D biomimetic culture assay enables interrogation of mechanisms governing muscle stem cell quiescence and niche repopulation
Source: eLife. 2022 Dec 20;11:e81738. doi: 10.7554/eLife.81738 (PMC9904761; doi:10.7554/eLife.81738)
Supplement: Figure 2—source data 1. — Data for subpanels separated into tabs. [file elife-81738-fig2-data1.xlsx]

## Sheet: Fig. 2D
Days post-engraftment	200 MuSCs															500 MuSCs															1500 MuSCs															2500 MuSCs
1	0.671463	0.57554	0.28777	1.82254	2.30216	2.39808	1.82254	2.48993	0.671463	0.767386	0.383693					3.26139	2.86331	5.7554	6.23501	4.41247	4.89209	5.46763	7.0024								13.6211	6.52278	7.96163	7.76978	7.48201	10.0432	8.22062									18.6331	11.7986	17.5779	20.5276
3	2.39808	1.6307	1.6307	5.94724	4.1247	4.60432	3.26139	2.01439	2.78177	2.11031	0.959233	1.43885				3.16547	2.20624	4.89209	6.33094	5.27578	4.22062	6.42686	2.20624	6.04317							11.7026	16.9784	7.57794	10.6475	5.46763	10.7434	8.15348	4.98801	7.79616							14.5084	16.6187	7.96163	12.9496
7	6.52278	3.64508	7.96163	11.223	8.15348	5.65947	3.93285	7.38609	4.41247	2.39808	1.247	3.06954				6.54916	5.65947	4.50839	5.43885	10.7434	4.70024	5.97602	6.16787	7.38609							4.98801	8.2494	4.41247	4.41247	4.22062	5.3717	7.4	5	7.0024	12.2782	3.35731					8.27818	11.8945	9.78417	9.59233
*values represent technical replicates from all biological replicates
[truncated: 5 more columns]
