# Supplementary material for: The mini-IDLE 3D biomimetic culture assay enables interrogation of mechanisms governing muscle stem cell quiescence and niche repopulation
Source: eLife. 2022 Dec 20;11:e81738. doi: 10.7554/eLife.81738 (PMC9904761; doi:10.7554/eLife.81738)
Supplement: Figure 3—figure supplement 1—source data 1. — Data for subpanels separated into tabs. [file elife-81738-fig3-figsupp1-data1.xlsx]

## Sheet: Fig3. S1B
	Percentagr Calcr+
1 DPE	100	75	83.3333	88.4298	69.2308	68.75	77.6471	68
3 DPE	20.6897	16.6667	12	19.883	19.3878	16.9139	15.0641
7 DPE	30.3571	14.8148	11.4865	10.7438	17.3554	13.3333	11.1111	13.4615	9.21053	9.31677	8.69565	12.5	18.5185	8.27068	1.29032
*values represent technical replicates from all biological replicates
