# Supplementary material for: The mini-IDLE 3D biomimetic culture assay enables interrogation of mechanisms governing muscle stem cell quiescence and niche repopulation
Source: eLife. 2022 Dec 20;11:e81738. doi: 10.7554/eLife.81738 (PMC9904761; doi:10.7554/eLife.81738)
Supplement: Figure 3—figure supplement 2—source data 1. — Data for subpanels separated into tabs. [file elife-81738-fig3-figsupp2-data1.xlsx]

## Sheet: Fig3. S2A
	Control	PSS	2.4% BaCl
SAA coverage	45.012	68.55	20.8
	61.329	82.762	21.526
	62.312	73.45	42.624
	45.691	62.147	20.829
	63.916	56.175	15.0582
	55.933	48.031	10.4712
	70.353	59.536	24.583
	60.395		8.194
			17.392
*values represent technical replicates from all biological replicates

## Sheet: Fig3. S2B
	Control	PSS	2.4% BaCl
DAPI/YFP/Pax7+ cells / mm2	4.75929	6.54916	4.16547
	5.19345	5.65947	6.20624
	6.29472	5.50839	4.89209
	4.75929	5.43885	6.33094
	5.39583	8.74341	5.27578
	5.28409	8.70024	5.22062
	4.80928	4.97602	6.42686
		6.16787	3.70624
		6.38609	6.04317
*values represent technical replicates from all biological replicates
