# Supplementary material for: The mini-IDLE 3D biomimetic culture assay enables interrogation of mechanisms governing muscle stem cell quiescence and niche repopulation
Source: eLife. 2022 Dec 20;11:e81738. doi: 10.7554/eLife.81738 (PMC9904761; doi:10.7554/eLife.81738)
Supplement: Figure 3—figure supplement 3—source data 1. — Data for subpanels separated into tabs. [file elife-81738-fig3-figsupp3-data1.xlsx]

## Sheet: Fig3. S3C
	EdU-																		EdU+
200 cells	71.4286	60	60	50	50	62.5	33.3333	25	57.1429	73.3333	66.6667								28.5714	40	40	50	37.5	66.6667	75	42.8571	26.6667	33.3333
500 cells	82.7586	77.7778	44.4444	72.7273	55	81.3953	80	59.2593	58.3333	81.25	70	63.6364	77.4194	71.4286	69.5652				17.2414	22.2222	55.5556	27.2727	45	18.6047	20	40.7407	41.6667	18.75	30	36.3636	22.5806	28.5714	30.4348
1500 cells	81.8182	84.375	96.4286	91.1111	88.8889	77.7778	85.7143	87.0968	91.875	88.6792	89.0533	84.466	78.7234	55.3571	66.6667	84			18.1818	15.625	3.57143	8.88889	11.1111	22.2222	14.2857	12.9032	8.125	11.3208	10.9467	15.534	15.534	21.2766	44.6429	33.3333
2500 cells	92.6829	100	82.7586	79.1667	82.5397	84.375	75.5814	86.4407	94.6429	81.1765	80	83.3333	85.2273						7.31707	0	17.2414	20.8333	17.4603	15.625	24.4186	13.5593	5.35714	18.8235	20	16.6667	14.7727
*values represent technical replicates from all biological replicates

## Sheet: Fig3. S3D
	200 cells	500 cells	1500 cells	2500 cells
YFP coverage	4.98478	4.9045	8.4174	23.899
	11.3416	5.71997	6.44894	20.8337
	3.70488	3.07758	11.4364	20.8319
	7.0647	7.67153	5.44618	11.0657
	3.84659	10.8476	7.89984	11.62
	3.75839	7.81865	6.94607	12.8735
	0.802384	14.4777	18.0993	11.9472
	1.63698	7.09744	23.5404	14.7405
	2.84297	10.1172	12.7409	16.7181
	2.647		9.26481
	4.17595		9.67108
	6.10778		27.7473
*values represent technical replicates from all biological replicates
