# Supplementary material for: The mini-IDLE 3D biomimetic culture assay enables interrogation of mechanisms governing muscle stem cell quiescence and niche repopulation
Source: eLife. 2022 Dec 20;11:e81738. doi: 10.7554/eLife.81738 (PMC9904761; doi:10.7554/eLife.81738)
Supplement: Figure 3—source data 1. — Data for subpanels separated into tabs. [file elife-81738-fig3-data1.xlsx]

## Sheet: Fig. 3B
	c-FOS-											c-FOS+
1 DPE	16.3934	6.18557	15.1899	24.7525	42.029	32.2034	28	20.6897	30			83.6066	93.8144	84.8101	75.2475	57.971	67.7966	72	79.3103	70
3 DPE	60	66.6667	73.6842	62.9518	75.3906	52.0833	65.3846	88.2353	78			40	33.3333	26.3158	37.0482	24.6094	47.9167	34.6154	11.7647	22
7 DPE	80.3419	88.5	82.4176	77.7027	66.7857	65.4545	80.7692	87.5	78.9474			19.6581	11.5	17.5824	22.2973	33.2143	34.5455	19.2308	12.5	21.0526
*values represent technical replicates from all biological replicates

## Sheet: Fig. 3C
	Ki67-												Ki67+
1 DPE	97.5	96	93.3673	96.8182	97.0833	92.1429	96.1953	93.5	96.073	97.5837			2.5	4	6.63265	3.18182	2.91667	7.85714	3.80471	6.5	3.92698	2.41628
3 DPE	52.1569	75.2308	77.381	79.0909	79.5238	53.3333	59.5192	58.4849	49.0603	59.5192	49.0603		47.8431	24.7692	22.619	20.9091	20.4762	46.6667	40.4808	41.5151	50.9397	40.4808	50.9397
7 DPE	85.3725	87.2667	91.6667	89.3333	87.7778	91.1429	89.421	89.9996	94.8607	85.2215	88.9936		14.6275	12.7333	8.33333	10.6667	12.2222	8.85714	10.579	10.0004	5.13928	14.7785	11.0064
*values represent technical replicates from all biological replicates

## Sheet: Fig. 3E
	EdU-																	EdU+
7 DPE	82.7586	77.7778	44.4444	72.7273	55	81.3953	80	59.2593	58.3333	81.25	70	63.6364	77.4194	71.4286	69.5652			17.2414	22.2222	55.5556	27.2727	45	18.6047	20	40.7407	41.6667	18.75	30	36.3636	22.5806	28.5714	30.4348
*values represent technical replicates from all biological replicates

## Sheet: Fig. 3G
	Ki67-																					Ki67+
PSS	82.5	76.5306	80.5104	73.2143	67.6471	77.1429	80.2632	82.8794	73.1481	75.9312	80.6289	66.6667	75.7143	81.25	74.359	73.5294						17.5	23.4694	19.4896	26.7857	32.3529	22.8571	19.7368	17.1206	26.8519	24.0688	19.3711	33.3333	24.2857	18.75	25.641	26.4706
2.4% BaCl	52.3256	44.6429	53.5294	39.521	36.1702	45	42.8571	44.7826	54.1812	54.845	39.267	60	31.25	56.1404	63.1579	64.2857	66.6667	44.4444				47.6744	55.3571	46.4706	60.479	63.8298	55	57.1429	55.2174	45.8188	45.155	60.733	40	68.75	43.8596	36.8421	35.7143	33.3333	55.5556
*values represent technical replicates from all biological replicates
