# Supplementary material for: The mini-IDLE 3D biomimetic culture assay enables interrogation of mechanisms governing muscle stem cell quiescence and niche repopulation
Source: eLife. 2022 Dec 20;11:e81738. doi: 10.7554/eLife.81738 (PMC9904761; doi:10.7554/eLife.81738)
Supplement: Figure 4—figure supplement 1—source data 1. — Data for subpanels separated into tabs. [file elife-81738-fig4-figsupp1-data1.xlsx]

## Sheet: Fig4. S1B
	Day 5	Day 0
YFP coverage	8.8062	19.143
	15.2432	8.8218
	10.7462	21.8714
	2.19	18.4638
	19.7288	18.2766
	13.8662	22.8472
	9.918	21.1562
	4.6332	16.7812
	0.457	42.6518
	22.2792	29.2442
	16.6142	28.1463
	12.7554
	16.266
	14.6964
	8.7324
*values represent technical replicates from all biological replicates
