# Supplementary material for: The mini-IDLE 3D biomimetic culture assay enables interrogation of mechanisms governing muscle stem cell quiescence and niche repopulation
Source: eLife. 2022 Dec 20;11:e81738. doi: 10.7554/eLife.81738 (PMC9904761; doi:10.7554/eLife.81738)
Supplement: Figure 4—source data 1. — Data for subpanels separated into tabs. [file elife-81738-fig4-data1.xlsx]

## Sheet: Fig. 4B
Days post-engraftment	2D
1	3.12477	5.59552	2.90677	4.59044	3.50385	5.02749	6.23501	5.08393	1.38351
3	4.72349	6.46755	3.19744	8.39457	9.40583	7.30573	9.3834	12.6619	15.4436	7.65541
7	1.8894	1.52605	1.67139	1.05296	1.95403	2.49178	5.7554	2.20624	0.553403
*values represent technical replicates from all biological replicates
	2D only
Ki67-	32.7925
Ki67+	67.2075
*values represent average from all replicates

## Sheet: Fig. 4C
Days post-engraftment	Day 5
1	2.01439	7.09832	3.64508	5.08393	6.23501	2.30216	2.494	2.78177	9.68825
3	6.13909	1.82254	4.02878	7.19424	4.89209	4.22062	2.20624	4.79616	6.6307
7	6.81055	4.60432	7.48201	5.46763	2.20624	4.45458	5.23649	5.68987	4.56891
*values represent technical replicates from all biological replicates
	Day 5 engraftment
Ki67-	89.096
Ki67+	10.904
*values represent average from all replicates

## Sheet: Fig. 4D
Days post-engraftment	Day 0
1	2.01439	2.58993	4.22062	3.26139	4.22062	3.26139
3	3.74101	1.91847	4.02878	4.02878
7	0	0.0959233	1.15108	0.479616	2.39808	1.6307
*values represent technical replicates from all biological replicates
	day 0
Ki67-	12.7248
Ki67+	87.2752
*values represent average from all replicates

## Sheet: Fig. 4E
Days post-engraftment	ECM only
1	2.01439	2.58993	5.03859	4.50286	3.49583	3.39693
3	3.74101	1.91847	1.20582	3.50564	2.30684	2.08594
7	0.0959233	0	0.0959233	1.0485	0.486039	0
*values represent technical replicates from all biological replicates
	ECM only
Ki67-	25.9533
Ki67+	74.0467
*values represent average from all replicates

## Sheet: Fig. 4F
Days post-engraftment	2D+myotubes
1	3.85146	2.54342	1.81673	0.799361	2.1074	7.42926	6.01918	8.72902	4.27818	4.86811	4.02878	4.31655	3.87382	4.60432	4.79616
3	3.01417	3.63346	4.06947	4.41247	7.67386	0	3.90647	3.45324	4.79616	6.13909	1.56798	4.31655	2.02915	4.31655
7	8.13894	4.43282	4.21481	2.39808	0.57554	0.191847	4.60432	0	2.20624	0.959233	3.50489	4.50839	1.84468
*values represent technical replicates from all biological replicates
	2d+myo
Ki67-	15.8426
Ki67+	84.1574
*values represent average from all replicates
