# Supplementary material for: The mini-IDLE 3D biomimetic culture assay enables interrogation of mechanisms governing muscle stem cell quiescence and niche repopulation
Source: eLife. 2022 Dec 20;11:e81738. doi: 10.7554/eLife.81738 (PMC9904761; doi:10.7554/eLife.81738)
Supplement: Figure 5—figure supplement 1—source data 1. — Data for subpanels separated into tabs. [file elife-81738-fig5-figsupp1-data1.xlsx]

## Sheet: Fig5. S1B
	2D	2D+myotubes	3D+myotubes
Max/min feret diameter	2.42494	2.50371	5.05144
	2.29138	2.16203	5.07242
	2.38662	3.59275	4.04082
	3.1002	3.25836	4.80613
	2.4507	3.36758	4.15291
	2.6659	3.39759	3.91496
	2.35342	3.27398	4.12853
	3.00591	3.88996	4.39779
	3.68316		4.28657
			3.7144
			4.19899
			4.11565
			4.38273
			6.31609
*values represent technical replicates from all biological replicates

## Sheet: Fig5. S1C
	2D	2D+myotubes	3D+myotubes
Nuclear Eccentricity	0.638137	0.786443	0.915134
	0.641787	0.693251	0.880272
	0.643166	0.777408	0.863308
	0.600472	0.709539	0.874692
	0.649978	0.811542	0.894383
	0.687814	0.817509	0.851244
	0.655757	0.855225	0.849354
	0.639172	0.81584	0.866392
	0.803189		0.763917
			0.798907
			0.790199
			0.763821
			0.780004
			0.718653
*values represent technical replicates from all biological replicates
