# Supplementary material for: The mini-IDLE 3D biomimetic culture assay enables interrogation of mechanisms governing muscle stem cell quiescence and niche repopulation
Source: eLife. 2022 Dec 20;11:e81738. doi: 10.7554/eLife.81738 (PMC9904761; doi:10.7554/eLife.81738)
Supplement: Figure 5—figure supplement 2—source data 1. — Data for subpanels separated into tabs. [file elife-81738-fig5-figsupp2-data1.xlsx]

## Sheet: Fig5. S2C
Manual Counting	Cellprofiler
0	0		*values represent individual images
1	1
1	1
2	2
1	1
0	0
0	0
1	2
1	1
1	0
2	2
1	1
0	0
0	0
1	2
0	0
0	0
0	0
0	0
1	0
2	2
1	1
1	1
2	2
4	4
4	4
0	1
1	1
0	0
1	1
0	0
1	1
1	1
0	0
0	0
3	3
0	0
0	0
0	0
1	2
3	3
4	4
5	5
1	1
1	1
4	6
0	1
0	0
2	2
0	0
2	2
0	0
3	3
0	0
2	2
1	1
0	0
0	1
5	5
0	0
0	0
14	10
1	1
0	0
0	0
0	0
3	3
2	2
0	0
4	5
1	0
9	10
6	6
6	8
15	18
10	11
10	10
6	9
6	6
8	8
12	11
4	4
4	4
7	7
1	0
5	5
0	0
0	0
3	1
4	2
0	0
4	4
2	0
1	1
7	5
5	5
0	0
0	0
10	8
1	1
2	1
0	0
0	1
1	0
0	0
2	2
0	0
0	0
1	1
4	4
0	0
0	0
0	0
1	1
0	0
8	8
1	0
6	6
1	0
2	2
14	14
7	10
17	17
7	7
10	10
