# Supplementary material for: The mini-IDLE 3D biomimetic culture assay enables interrogation of mechanisms governing muscle stem cell quiescence and niche repopulation
Source: eLife. 2022 Dec 20;11:e81738. doi: 10.7554/eLife.81738 (PMC9904761; doi:10.7554/eLife.81738)
Supplement: Figure 5—figure supplement 3—source data 1. — Data for subpanels separated into tabs. [file elife-81738-fig5-figsupp3-data1.xlsx]

## Sheet: Fig5. S3A
1DPE	Pax7+/MyoD-	Max/min feret diameter	Eccentricity		Pax7+/MyoD+	Max/min feret diameter	Eccentricity			3DPE	Pax7+/MyoD-	Max/min feret diameter	Eccentricity		Pax7+/MyoD+	Max/min feret diameter	Eccentricity			7DPE	Pax7+/MyoD-	Max/min feret diameter	Eccentricity		Pax7+/MyoD+	Max/min feret diameter	Eccentricity
		4.20472	0.936521			1.94606	0.640859					1.86212	0.787855			2.42226	0.90751					1.99473	0.897037			3.09504	0.685204
		2.43659	0.917907			1.49712	0.731628					3.00008	0.902578			3.57741	0.968192					15.9484	0.959789			2.31686	0.898568
		2.3968	0.269316			1.08444	0.366731					1.06364	0.465533			4.16328	0.957449					7.55644	0.97384			4.08945	0.975229		*Values represent individual cells
		2.73825	0.898995			2.45578	0.887849					1.32391	0.290346			1.68211	0.802574					2.13153	0.89969			2.65757	0.925567
		1.31281	0.520798			4.6444	0.96413					1.27383	0.440983			2.12254	0.919032					1.72976	0.851318			1.84186	0.857628
		1.50677	0.220759			1.64859	0.918002					1.60941	0.821224			1.2132	0.534072					4.60273	0.937811			2.68713	0.952873
		2.08288	0.86753			2.86273	0.867506					2.53642	0.76189			1.18718	0.463189					4.58791	0.927027			1.71591	0.693777
		3.16507	0.929444			1.29928	0.616843					13.6134	0.973787			2.48003	0.887379					3.68492	0.854741			2.00336	0.838702
		2.12897	0.882208			1.39311	0.585994					4.07981	0.69226			3.92636	0.827243					2.44529	0.595318			2.99375	0.868147
		1.12674	0.856022			3.12308	0.728678					2.46276	0.908359			5.80321	0.921466					3.67151	0.851335			3.60679	0.965151
		1.19154	0.444707			1.58386	0.977068					4.30285	0.872679			3.2441	0.860235					4.86215	0.887415			4.72936	0.982976
		2.2656	0.875386			1.52069	0.637803					2.54553	0.923175			5.69122	0.905952					1.43415	0.817285			2.30782	0.917748
		1.70775	0.929542			1.39069	0.659265					1.29962	0.605128			1.5852	0.712654					2.65369	0.949142			1.35168	0.422673
		2.29269	0.886533			1.15996	0.552807					2.56891	0.862299			1.46388	0.863936					1.85629	0.938161			3.1588	0.76626
		1.34057	0.792905			1.8317	0.678857					1.54421	0.703323			1.31832	0.658168					3.77726	0.782825			4.70326	0.776976
		1.30507	0.789319			2.56562	0.926239					5.64486	0.960128			1.86126	0.767952					1.27702	0.730235			2.00122	0.567518
		2.89617	0.890908			1.66186	0.93826					3.92466	0.943359			1.44265	0.609537					1.75762	0.940576			4.30059	0.924582
		1.27245	0.7169			3.44995	0.92876					3.32224	0.619022			1.32572	0.597494					2.06035	0.796616			4.38533	0.830743
		3.24771	0.895064			2.76555	0.954814					2.14076	0.927678			1.28362	0.576217					3.2599	0.939253			4.86281	0.81352
		2.5588	0.958085			1.05559	0.87154					4.82031	0.989286			2.2896	0.851351					6.61305	0.777096			4.99142	0.83795
		1.09432	0.288105			1.38951	0.831122					3.02665	0.405054			3.52706	0.965468					6.70417	0.920638			5.49128	0.892098
		1.65745	0.752701			5.88619	0.967056					4.50931	0.933481			1.56568	0.419715					12.0482	0.904923			2.34873	0.797158
		1.32368	0.744373			1.43962	0.642103					1.90814	0.818917			1.67844	0.706815					16.6015	0.950076			3.08741	0.814976
		1.29289	0.417111			1.48843	0.605052					2.73498	0.932983			7.20629	0.802986					2.72647	0.845098			4.22946	0.851238
		1.44983	0.46825			1.30276	0.887522					1.47635	0.547355			1.63733	0.939793					2.15551	0.83597			2.29816	0.763224
		3.40161	0.933593			2.23818	0.887316					2.34194	0.737901			1.66112	0.679704					2.84887	0.813723			3.18059	0.762911
		1.46181	0.607331			1.29411	0.533237					1.88425	0.769438			2.71402	0.594026					3.94159	0.923798			1.56364	0.580516
		1.24401	0.622943			2.47872	0.953427					1.78778	0.776931			2.77987	0.940934					2.79721	0.96327			1.559	0.675012
		2.62711	0.820739			3.5033	0.897462					3.56339	0.936605			2.4932	0.891348					8.937	0.69837			3.24533	0.978362
		5.21805	0.971474			3.65563	0.964933					1.52415	0.775793			3.64671	0.949255					2.41079	0.826318			3.8425	0.913214
		1.19977	0.581436			1.74539	0.762183					3.43812	0.896621			1.89304	0.780966					4.4242	0.800902			1.9436	0.933506
		2.13565	0.839605			2.43827	0.85485					3.03356	0.926499			2.19794	0.807777					2.99608	0.938136			1.76186	0.683499
		1.32061	0.858839			1.74465	0.681769					4.4743	0.970465			3.99892	0.963494					9.35002	0.895181			2.43566	0.842527
		1.09921	0.357068			2.09836	0.710775					2.32991	0.890813			2.19551	0.831789					1.6409	0.839667			2.11136	0.60949
		1.15858	0.441438			2.0718	0.849475					2.56233	0.8915			4.25556	0.960165					12.2885	0.967358			1.9782	0.847196
		2.19796	0.849827			1.408	0.871192					1.79606	0.828197			2.02034	0.86251					9.93198	0.952045			1.7868	0.961895
		3.25711	0.63892			1.93764	0.643671					3.84297	0.93206			4.08378	0.69291					6.64455	0.82713			2.67372	0.903432
		1.30014	0.754747			2.6471	0.900147					2.03843	0.796502			6.88226	0.879293					2.95374	0.937041			4.98588	0.914452
		2.39069	0.789803			1.36656	0.494071					2.46518	0.833547			1.26648	0.631221					10.2815	0.934541			1.96557	0.852041
		2.46411	0.919515			2.66597	0.949836					2.90886	0.925244			4.28344	0.970098					11.4733	0.906669			1.77941	0.741184
		1.49724	0.886654			2.01867	0.762139					2.03179	0.793439			1.27454	0.970765					9.14578	0.918955			2.63468	0.941695
		2.12876	0.549557			2.53714	0.89894					2.02914	0.840782			1.35647	0.642298					4.04285	0.983669			1.76244	0.826955
		1.35339	0.533425			2.05348	0.903199					2.68985	0.907719			3.94863	0.894531					5.41315	0.736712			2.82854	0.918001
		1.48353	0.688374			2.38421	0.871513					2.46661	0.830076			2.55125	0.930334					4.2488	0.952412			1.71254	0.643618
		1.24804	0.620153			1.44508	0.877428					4.94	0.950354			4.4832	0.978423					5.50112	0.921594			3.30657	0.970711
		5.95804	0.981262			4.53494	0.951644					1.19737	0.246539			4.42286	0.946329					5.5676	0.903576
		1.44488	0.754954			3.68891	0.851009					1.29696	0.622417			3.3343	0.953678					1.59775	0.864693
		1.85105	0.768505			1.8623	0.828309					7.96281	0.975863			1.24459	0.763512					2.93486	0.910824
		1.42982	0.75882			1.42352	0.733736					5.30689	0.884758			2.59841	0.92665					4.45494	0.90679
		1.17121	0.280957									5.249	0.958099			3.59426	0.983735					8.03339	0.985054
		1.07279	0.301567									5.65882	0.947446			5.20959	0.662304					5.35702	0.894516
		3.12255	0.892616									1.13333	0.531023			1.56761	0.8483					2.26895	0.825616
		1.30922	0.694309									1.13696	0.292084			2.91128	0.944879					4.10834	0.813507
		2.78552	0.904453									1.23791	0.591922			3.00235	0.833416					1.75925	0.793059
		3.66142	0.945685									1.94494	0.751019			1.35817	0.623105					2.73728	0.804066
		3.44168	0.946386									5.12117	0.977241			2.57665	0.853544					4.73186	0.917203
		2.7657	0.893224									5.82001	0.922942			2.94942	0.865845					2.42858	0.858268
		1.79892	0.754295									1.19648	0.69904			4.81623	0.780827					10.5025	0.923127
		1.71506	0.759976									3.29018	0.967412			1.46333	0.979069					2.41822	0.854402
		1.36341	0.684435									5.85651	0.838373			3.23614	0.638151					2.74107	0.862499
		2.51034	0.531763									2.70233	0.718072			3.56453	0.924936					5.12487	0.815455
		1.29284	0.26194									2.41999	0.772028			6.56534	0.985823					9.13901	0.902963
		1.19151	0.337068									3.14167	0.954387			6.8832	0.939039					14.8497	0.977949
		4.92003	0.95266									3.80695	0.914401			3.61467	0.864277					17.6194	0.962035
		1.93013	0.8798									1.48495	0.382477			4.45595	0.874392					6.05475	0.986639
		2.54153	0.738398									1.2783	0.567677			2.0398	0.580365					1.97618	0.83531
		2.65658	0.856591									2.22679	0.917612			3.26495	0.911789					9.81777	0.951347
		4.72344	0.969544									1.54686	0.766951			2.91942	0.86047					6.31365	0.936403
		3.05484	0.922212									1.22756	0.568131			3.21193	0.921576					1.63308	0.947724
		5.55785	0.934563									1.12955	0.453379			1.78584	0.965165					5.33621	0.849809
		2.13914	0.833882									1.98676	0.959959			1.0984	0.467982					2.22383	0.748566
		2.62243	0.835728									2.52387	0.872224			3.28922	0.8662					7.62877	0.916276
		1.1951	0.547776									2.30655	0.573297			6.79458	0.832782					2.10941	0.751775
		1.19875	0.856432									3.05192	0.822712			3.85061	0.801103					6.81649	0.837452
		1.42227	0.774171									2.38895	0.900471			1.90136	0.883031					8.59089	0.924081
		1.8213	0.369391									1.66456	0.733841			5.35522	0.959611					4.67947	0.868109
		1.19477	0.478024									1.7302	0.83659			1.68589	0.742646					3.19575	0.892665
		1.10468	0.330354									4.49589	0.848546			2.28161	0.809925					2.77428	0.902708
		4.38254	0.906733									2.37998	0.882762			1.46859	0.819903					1.81808	0.815962
		2.20852	0.905957									2.10189	0.624323			2.77851	0.979681					2.21718	0.843056
		1.9143	0.869439									3.68557	0.974998			3.5533	0.752344					3.71553	0.816099
		1.97778	0.85574									3.30854	0.882346			4.61971	0.845548					2.75397	0.886211
		2.72259	0.903027									1.51623	0.958494			1.57182	0.530855					6.66255	0.907575
		1.63731	0.70094									1.44655	0.501065			1.34412	0.740556					3.71316	0.844836
		1.48227	0.748086									1.32644	0.641169			2.06906	0.600473					6.50204	0.848408
		1.75489	0.778028									1.61527	0.65263			1.40661	0.698845					8.45079	0.914237
		1.11417	0.351504									1.60222	0.53787			2.78572	0.948533					3.45758	0.9071
		2.2252	0.854252									1.40902	0.588172			2.03346	0.784643					5.69699	0.762245
		1.97249	0.621499									1.7669	0.739744			1.16691	0.422557					2.12465	0.973958
		1.34672	0.625284									1.48312	0.819431			1.16494	0.52915					6.38583	0.827398
		2.82806	0.803514									2.47108	0.862144			1.3399	0.643445					6.201	0.85562
		1.18341	0.526175									1.33406	0.885483			2.80153	0.863667					12.0985	0.903305
		2.09088	0.804911									1.8696	0.756131			3.38391	0.802471					5.61745	0.84865
		1.36097	0.609615									1.23436	0.675376			1.40796	0.688075					8.94565	0.876072
		1.22716	0.353491									11.8281	0.93351			3.84848	0.875837					4.18237	0.88651
		1.31039	0.595388									2.91078	0.731209			2.79008	0.586896					14.9511	0.939729
		1.64941	0.675671									5.36783	0.886686			2.87839	0.790065					3.784	0.951045
		1.37203	0.535389									2.45192	0.955192			3.6811	0.947985					6.93931	0.868401
		1.6758	0.230501									1.70317	0.642295			4.78326	0.915867					4.1894	0.571899
		1.74281	0.80186									5.03715	0.91578			1.17841	0.844348					7.33785	0.879385
		1.18184	0.468393									1.60261	0.818575			4.36133	0.795887					4.01856	0.869962
		1.57383	0.752286									2.65795	0.80949			1.57633	0.685144					3.43017	0.831671
		1.87159	0.78003									2.31588	0.841314			2.09053	0.937727					3.15853	0.888447
		1.25519	0.430166									3.63966	0.830775			2.35536	0.84716					3.10665	0.865865
		1.44904	0.765146									1.35542	0.810037			3.30999	0.907694					5.10901	0.790064
		1.33253	0.755125									1.76118	0.642238			1.40028	0.62372					7.37565	0.902432
		2.12189	0.79288									2.84826	0.936751			1.64476	0.946946					12.5946	0.963468
		1.41585	0.516809									2.64392	0.854373			2.76505	0.883672					5.80345	0.908
		2.03717	0.902039									4.65448	0.96639			2.59289	0.796167					5.38706	0.795864
		1.93879	0.891049									4.1586	0.963533			7.56546	0.856904					3.92365	0.619235
		3.20506	0.926971									4.60037	0.827007			2.12913	0.697171					2.72199	0.860464
		2.89784	0.616546									1.47266	0.819464			1.63184	0.720929					1.54073	0.938608
		5.77071	0.895537									2.9686	0.886819			1.10018	0.330823					8.59484	0.9471
		2.20124	0.844547									2.79863	0.920122			3.87895	0.870222					4.43748	0.957585
		2.02982	0.735227									1.89909	0.648443			2.62678	0.490409					3.11544	0.79092
		2.25027	0.957639									1.27278	0.700549			1.66243	0.535035					3.43503	0.922928
		2.37259	0.709414									4.06099	0.90305			1.59934	0.730765					3.04742	0.91335
		2.76101	0.891098									3.9754	0.808548			1.40091	0.570817					1.84427	0.881239
		1.63011	0.40537									2.45443	0.937618			2.6577	0.690214					9.12586	0.994532
		1.35628	0.401174									6.02258	0.944919			4.73679	0.876584					13.7375	0.948761
		1.33929	0.393355									3.88116	0.967844			5.80552	0.841731					8.93949	0.945601
		1.71801	0.63631									8.45776	0.96281			1.87889	0.630683					4.9995	0.852563
		3.87101	0.939408									1.20746	0.625412			1.09835	0.383576					4.9207	0.941251
		1.4715	0.646857									3.83751	0.89402			1.14031	0.409768					10.3996	0.935485
		2.68893	0.904844									1.35723	0.449821			2.12215	0.76689					5.79282	0.945136
		1.15554	0.355036									3.64942	0.93158			1.54028	0.686811					2.57635	0.951624
		2.63999	0.883539									4.85151	0.874936			1.83554	0.953713					2.98671	0.948668
		1.49155	0.566919									1.67108	0.852755			2.26072	0.927109					3.38034	0.963473
		1.80563	0.813652									1.62195	0.788504			1.50868	0.795393					1.82509	0.933121
		2.16291	0.868978									1.86812	0.727237			1.53544	0.512909					3.66596	0.974312
		1.41323	0.74698									1.6746	0.876406			1.9587	0.689553					4.23407	0.980161
		3.97013	0.965593									1.27696	0.612506			1.34094	0.731365					4.40466	0.979547
		2.9245	0.882983									1.81189	0.563169			1.66458	0.824909					1.52053	0.78538
		2.33998	0.847935									2.99861	0.73549			5.08386	0.538294					2.58514	0.929785
		3.98426	0.94164									2.85545	0.835316			1.58905	0.836343					2.95768	0.926273
		1.31703	0.844505									2.99231	0.914399			1.79246	0.630201					3.57779	0.95586
		1.63039	0.535881									1.96575	0.794081			3.00365	0.955382					3.61305	0.772529
		1.72572	0.411121									1.69911	0.663406			1.44274	0.92415					2.77949	0.935554
		2.3991	0.846333									3.84189	0.719966			1.90505	0.974974					12.3824	0.969681
		1.72393	0.747231									6.3598	0.711305			1.55748	0.548267					3.02848	0.963852
		1.2457	0.351654									1.36574	0.62189			1.49235	0.437807					6.1536	0.940599
		1.14342	0.438242									1.46708	0.814753			5.91967	0.910653					1.9596	0.882928
		3.69584	0.911158									1.97911	0.903578			2.13006	0.891164					3.10875	0.792314
		1.78449	0.920204									5.76877	0.945241			4.5046	0.978213					3.9813	0.975309
		2.51946	0.868669									2.17986	0.702694			1.4452	0.559706					3.68902	0.971633
		2.76162	0.855972									4.31222	0.982303			1.81916	0.878849					1.65939	0.548085
		2.45434	0.812435									1.6527	0.647116			4.31311	0.819777					2.81136	0.512157
		1.09588	0.458651									1.49867	0.838941			2.12127	0.899693					2.05409	0.908243
		1.61111	0.769625									2.84673	0.903269			1.88017	0.879299					3.04904	0.850831
		1.26642	0.534206									2.93624	0.715447			1.64296	0.908894					5.10747	0.884611
		2.95222	0.935818									2.60734	0.920292			3.21129	0.9245					2.18694	0.970743
		1.56893	0.621229									3.63566	0.795013			2.98212	0.953412					4.79315	0.942141
		1.60934	0.750955									2.11472	0.777154			1.96635	0.832725					2.38191	0.785672
		2.29962	0.887731									2.92559	0.909141			2.82807	0.924624					6.23564	0.86631
		1.16698	0.781258									2.68663	0.802908			2.16646	0.86508					4.33871	0.929944
		1.1397	0.439445									4.39587	0.857391			2.45822	0.849973					3.22988	0.969143
		3.89635	0.96887									4.77715	0.910049			2.13156	0.812335					2.68012	0.9338
		2.49193	0.883729									3.13246	0.887617			1.31147	0.470706					11.6742	0.9804
		3.47519	0.889444									2.69738	0.878976			2.61662	0.866751					2.60256	0.787392
		4.11139	0.950289									4.56335	0.894431			2.87298	0.960053					4.45452	0.958123
		1.32577	0.29963									4.31491	0.911141			2.85629	0.842633					2.14677	0.898965
		1.56394	0.467985									1.56	0.792423			10.0729	0.979664					2.67696	0.931957
		2.53583	0.89185									1.7766	0.811803			1.49599	0.730527					6.28047	0.656526
		2.26353	0.837414									2.76638	0.846499			2.13231	0.875845					5.74098	0.880785
		3.4244	0.931945									2.0347	0.794743			2.17803	0.853844					3.7126	0.706377
		1.62325	0.546978									1.3937	0.468174			4.99456	0.973437					7.36479	0.923702
		1.20985	0.48572									3.31	0.920723			5.65754	0.85638					2.54752	0.800314
		2.63203	0.894957									2.81029	0.906299			2.36362	0.941379					9.8073	0.979118
		1.56772	0.90197									2.83084	0.696176			1.73936	0.770529					4.49708	0.645035
		2.58101	0.790754									4.2718	0.963953			3.73706	0.905614					5.9291	0.956782
		1.13638	0.271408									3.25902	0.937349			2.02093	0.750644					8.34185	0.940029
		2.19355	0.87065									4.72161	0.889111			1.25543	0.697992					3.91198	0.984537
		1.74009	0.828796									3.77467	0.937949			1.42583	0.741052					4.08683	0.896194
		1.2766	0.540901									2.69243	0.876919			6.15737	0.831765					1.63153	0.509886
		2.66084	0.91701									10.3497	0.948292			7.96709	0.923112					2.85649	0.899978
		1.67628	0.787601									4.14844	0.933813			2.56344	0.778883					3.3291	0.955635
		2.7948	0.905724									4.23858	0.92969			3.56944	0.961929					5.75996	0.938462
		1.3509	0.715615									1.40052	0.710307			2.4407	0.752277					3.14206	0.655809
		2.92321	0.93849									1.60951	0.827527			3.27951	0.756924					11.3203	0.873739
		1.87787	0.932257									6.66962	0.884876			2.26929	0.951719					1.4955	0.836969
		1.44292	0.647805									3.39485	0.861183			1.66834	0.812004					4.29736	0.839636
		1.14742	0.315372									3.34549	0.904541			1.30985	0.94532					9.03902	0.905221
		2.28683	0.891612									2.29579	0.671059			2.51027	0.732026					5.58381	0.914915
		1.33617	0.668879									2.78514	0.787687			2.75108	0.649306					10.4776	0.960095
		1.93077	0.854638									1.80083	0.521576			2.99675	0.909676					18.9122	0.936723
		2.39747	0.909275									1.36426	0.458203			2.23184	0.811406					7.25842	0.920328
		1.78952	0.836397									4.4023	0.933273			1.65266	0.512924					4.60693	0.908045
		2.00416	0.883281									5.88176	0.88564			2.09904	0.971268					3.37083	0.677739
		1.98307	0.820939									3.35703	0.979571			4.87337	0.947574					2.76196	0.774384
		2.85281	0.923777									4.44066	0.9615			2.61895	0.948612					1.68471	0.556457
		1.6644	0.816071									1.14533	0.690442			1.38407	0.864172					8.0441	0.817543
		1.72232	0.826395									2.75475	0.822986			1.5755	0.774118					2.14596	0.650425
		2.17264	0.85352									7.79095	0.915397			1.25065	0.343519					7.89575	0.834444
		2.37047	0.865121									6.56247	0.88317			2.29747	0.771825					5.0396	0.867564
		2.15354	0.924903									4.81306	0.941374			1.49549	0.371704					2.54104	0.862415
		1.56702	0.915972									7.3907	0.681887			2.18342	0.743206					2.16649	0.934584
		1.59834	0.874094									1.70649	0.91893			1.74949	0.718884					2.43966	0.794444
		3.6675	0.961169									4.16325	0.588946			2.98776	0.882954					1.66567	0.717602
		2.59143	0.870938									2.77701	0.707727			1.41598	0.467025					3.92057	0.714564
		2.2492	0.86615									3.68297	0.611789			1.08147	0.834733					3.70386	0.895775
		2.17386	0.833291									4.93578	0.853587			1.42933	0.354536					1.30257	0.532292
		1.45734	0.955494									3.58566	0.959944			1.39418	0.667347					4.68898	0.902681
		3.86984	0.95149									4.47058	0.766952			2.25386	0.785547					8.74299	0.969638
		2.37647	0.906678									4.01653	0.956377			1.87217	0.685736					7.14828	0.908088
		2.74958	0.915254									3.98412	0.946087			2.98758	0.928603					7.24746	0.88474
		1.84296	0.971543									5.74092	0.962747			3.46032	0.97551					1.93422	0.592351
		3.23408	0.947053									3.24559	0.893091			1.53887	0.559036					4.55912	0.897243
		1.55395	0.886504									1.61245	0.676749			3.79982	0.955223					3.21227	0.815086
		2.43686	0.8991									1.60979	0.734761			1.87997	0.720038					4.44299	0.695207
		2.07861	0.861917									2.61446	0.806924			2.37178	0.738519					3.98286	0.977042
		1.60494	0.669154									3.70511	0.924787			1.71759	0.826308					1.25896	0.765718
		2.21234	0.877934									2.04983	0.893962			2.88141	0.862511					13.5352	0.953391
		2.96225	0.925711									1.25993	0.844052			5.99933	0.810303					1.40266	0.796323
		3.18447	0.894204									1.32361	0.867677			5.25174	0.888783					5.21837	0.922368
		3.23471	0.948187									1.61635	0.794161			1.83152	0.616173					10.5071	0.890805
		1.38735	0.386898									1.80896	0.908404			3.92339	0.907612					8.87474	0.942063
		2.51884	0.917712									2.54807	0.886836			6.48564	0.887036					5.83804	0.818191
		2.41751	0.876211									5.44851	0.7595			5.99509	0.951193					13.6391	0.928635
		2.38678	0.938287									3.26473	0.94953			2.94324	0.180123					6.20787	0.955575
		2.67245	0.938242									4.00632	0.744494			5.82434	0.846087					4.15547	0.728159
		2.32366	0.946122									4.91253	0.971122			10.4074	0.863468					2.1234	0.464609
		2.98461	0.946033									6.86896	0.982378			3.78085	0.805244					5.30131	0.745921
		2.45747	0.879321									2.02946	0.965045			1.47132	0.96429					11.4043	0.860569
		1.53166	0.880145									5.74788	0.925633			1.09692	0.282395					9.41561	0.913414
		2.075	0.887446									13.9991	0.961609			6.06086	0.809968					3.48789	0.631351
		1.71353	0.897112									3.92746	0.820991			3.26789	0.801009					15.0705	0.960146
		3.01266	0.8276									3.73834	0.911933			6.64025	0.722199					2.2433	0.718616
		1.85294	0.932215									5.08862	0.929615			2.25434	0.641221					2.94183	0.804062
		1.98028	0.796795									1.86802	0.834578			2.9925	0.937968					9.61581	0.9533
		2.04818	0.837989									2.34983	0.836844			6.68462	0.976581					13.6738	0.995048
		2.27545	0.922806									1.2275	0.94779			4.50346	0.926246					9.15025	0.961601
		3.01534	0.931802									5.8627	0.905507			2.42046	0.8348					4.39094	0.907265
		1.26795	0.671374									4.66494	0.976271			8.39816	0.867753					5.77816	0.809709
		2.55563	0.88832									1.75357	0.696816			6.43545	0.971457					5.29999	0.73984
		1.98437	0.727882									5.33894	0.979852			3.93566	0.964495					6.11363	0.888803
		2.49633	0.912389									1.81525	0.591313			1.4792	0.703698					4.41085	0.817369
		1.77099	0.811425									4.93293	0.922013			7.15793	0.960678					5.07416	0.733366
		2.97122	0.939482									4.05091	0.943935			1.73441	0.805358					3.80229	0.909798
		1.83489	0.827037									3.56272	0.838819			2.91917	0.928431					4.50276	0.817699
		1.62553	0.650387									1.81339	0.769969			2.10699	0.849371					8.12481	0.982819
		2.20732	0.847292									1.42523	0.765222			2.45958	0.844824					5.65444	0.957682
		2.91336	0.934215									1.91251	0.899678			1.34931	0.756552					9.87803	0.921918
		2.15309	0.922717									5.82981	0.96092			5.64887	0.556565					9.03662	0.925915
		1.98823	0.878919									6.83991	0.895841			6.02887	0.957807					6.51274	0.957818
		2.24682	0.938008									2.58348	0.693537			2.17001	0.896733					6.06399	0.954574
		3.45254	0.940097									6.5828	0.956235			3.99262	0.95967					7.76101	0.922583
		4.25165	0.949937									3.89788	0.824584			2.59049	0.828532					3.34969	0.86978
		1.7397	0.834875									4.7544	0.906052			2.4242	0.867223					3.9918	0.774316
		2.47011	0.855774									2.95297	0.980125			1.82514	0.895399					4.34235	0.932878
		1.53787	0.685912									3.29739	0.839564			5.61023	0.815166					5.12929	0.674253
		2.77531	0.897626									1.28744	0.653066			4.74754	0.969825					2.61172	0.916707
		1.40463	0.737335									1.64228	0.914614			2.26906	0.88505					1.79799	0.628354
		1.59837	0.814144									3.74664	0.825911			1.94246	0.871497					2.99043	0.925781
		1.31576	0.664888									1.39421	0.761269			2.39249	0.872252					5.19589	0.895635
		3.17421	0.954779									1.53029	0.382904			4.03545	0.953728					3.1633	0.959298
		2.58398	0.902484									4.42602	0.960986			2.39432	0.607727					4.92101	0.925269
		2.29465	0.901239									4.89079	0.940001			3.2307	0.858535					4.99342	0.985096
		2.7791	0.84865									3.36381	0.798536			4.32169	0.979083					1.83568	0.725252
		1.24516	0.675577									2.53355	0.478702			2.85442	0.882425					5.33023	0.877529
		2.03095	0.828127									1.653	0.718693			1.96544	0.863731					2.45927	0.9385
		2.41975	0.881825									3.97336	0.936852			2.78465	0.94088					3.8336	0.771701
		2.77262	0.924286									1.72628	0.625947			2.17634	0.898481					6.39243	0.915958
		2.47722	0.945833									2.90166	0.696362			3.62286	0.991055					5.84846	0.952525
		1.79973	0.84471									4.95434	0.658371			2.06268	0.882849					2.79055	0.912165
		1.23429	0.860538									2.33391	0.978137			1.66448	0.740756					1.19779	0.948208
		2.7316	0.931819									5.46612	0.801823			2.485	0.97289					4.90901	0.965316
		1.78081	0.842649									1.7856	0.776422			1.69056	0.750814					2.91305	0.725201
		1.8548	0.852233									1.54696	0.690696			1.18535	0.599207					2.62264	0.855773
		3.00961	0.958176									3.41918	0.865661			4.38352	0.83953					1.99907	0.689797
		2.95921	0.969224									2.16999	0.782331									1.41653	0.878691
		2.63881	0.934055									3.48771	0.805188									5.86874	0.944976
		2.20063	0.939584									2.3434	0.91618									3.82314	0.882448
		1.68165	0.834603									1.19153	0.291661									3.70393	0.774988
		2.36686	0.922239									3.20408	0.794653									2.77377	0.968649
		2.1373	0.874826									1.74201	0.823412									2.00062	0.907933
		1.7199	0.810884									3.87091	0.821007									11.0555	0.980156
		1.43425	0.945666									1.76189	0.862978									2.87906	0.928224
		3.39009	0.697787									1.66413	0.607879									5.50028	0.861567
		1.37685	0.684087									1.80643	0.880938									7.88856	0.942966
		1.27617	0.617554									4.54923	0.953001									5.34862	0.926032
		1.30564	0.665856									2.34582	0.973343									3.45275	0.810027
		2.08999	0.911348									5.68743	0.948627									9.81109	0.923197
		1.14433	0.516868									3.27416	0.556344									2.96822	0.742178
		3.05093	0.935934									2.25915	0.502051									3.22837	0.674113
		2.07223	0.826333									3.71989	0.706578									6.86892	0.950746
		2.2864	0.869427									2.51076	0.858864									1.86715	0.731429
		1.70817	0.814445									1.60731	0.842579									4.95478	0.975051
		2.85916	0.911412									3.38348	0.928726									4.01993	0.991186
		3.59138	0.963502									3.88594	0.936669									5.94335	0.881301
		2.18528	0.897644									5.4084	0.892911									7.36856	0.886433
		2.1511	0.929873									1.50988	0.920686									2.61556	0.898854
		2.19874	0.870427									2.8063	0.95579									5.50766	0.960373
		1.48333	0.947127									3.56656	0.864571									2.77464	0.81274
		1.79352	0.9257									4.08287	0.624077									7.54408	0.88573
		1.64292	0.907877									7.63762	0.962338									7.53268	0.82728
		2.38526	0.865929									2.61979	0.457546									1.31124	0.97445
		2.0601	0.941494									3.97516	0.939956									5.24428	0.637938
		2.98585	0.888394									1.98072	0.854432									5.44865	0.9459
		2.13421	0.88267									3.36257	0.822062									4.05073	0.913911
		3.14933	0.944113									2.39366	0.930352									2.27607	0.620497
		1.72892	0.81678									1.52686	0.748144									3.59344	0.926978
		1.38702	0.9831									3.15262	0.887567									6.44133	0.989977
		1.16799	0.623164									3.04699	0.814014									4.63191	0.927331
		2.84447	0.892634									5.32941	0.915958									1.91626	0.785766
		2.33257	0.86632									3.35157	0.73156									3.51085	0.966901
		1.951	0.831142									1.47525	0.647011									11.0996	0.991257
		3.39171	0.973091									4.46927	0.713371									13.705	0.983503
		1.82607	0.925059									2.14738	0.546956									9.13537	0.931489
		2.36484	0.788888									2.6681	0.907554									5.96608	0.978218
		1.78973	0.87253									4.3852	0.955759									3.15923	0.931379
		2.20745	0.727039									3.46068	0.926477									13.0572	0.994005
		1.48241	0.934258									6.13346	0.972781									3.50587	0.917269
		2.1084	0.878216									9.39946	0.904798									1.19908	0.862977
		2.17385	0.830723									5.12626	0.885429									3.96791	0.840311
		2.66928	0.96912									5.26951	0.875102									5.6092	0.93948
		2.55568	0.936952									4.03147	0.866248									5.41861	0.847897
		3.41684	0.711194									1.97114	0.784333									3.66268	0.901231
		1.83245	0.84546									5.15979	0.897212									4.48097	0.907183
		1.9194	0.78568									5.8415	0.957115									2.87025	0.83956
		2.54329	0.0868078									2.96633	0.903671									5.65675	0.98632
		2.14524	0.851423									6.02376	0.96371									3.4603	0.525504
		1.83203	0.791392									3.27494	0.952171									3.15541	0.950743
		1.34191	0.632245									4.14337	0.923664									3.49856	0.710801
		3.3857	0.939594									4.51594	0.944415									5.41267	0.868604
		1.39856	0.816076									4.52059	0.862643									2.17701	0.956347
		1.29662	0.763886									4.90592	0.846002									2.17765	0.959664
		1.66779	0.822074									1.49289	0.758854									10.9598	0.92491
		1.33998	0.715931									3.95191	0.969184									3.89346	0.907145
		2.0981	0.873138									1.67647	0.893208									17.2721	0.949518
		1.6179	0.815409									2.02531	0.934811									3.14542	0.872457
		2.8285	0.921324									4.72541	0.805565									9.83161	0.861317
		1.38348	0.553056									1.30138	0.853273									4.00005	0.99424
		4.05352	0.970179									4.12929	0.908742									2.34808	0.937081
		1.72404	0.929321									7.48144	0.844439									1.41901	0.614208
		2.07878	0.929029									7.5113	0.867173									1.79136	0.705558
		2.53341	0.921									2.5629	0.981173									3.54285	0.987632
		1.60795	0.744545									1.72015	0.656516									4.10043	0.908724
		1.19435	0.602383									5.78617	0.786074									1.43796	0.576622
		1.22301	0.599275									5.83598	0.730199									3.1969	0.820824
		1.76901	0.78778									5.1834	0.961797									4.81976	0.803432
		1.3361	0.767708									5.30079	0.93987									4.28773	0.965087
		1.94244	0.81878									4.43858	0.9077									4.05928	0.857461
		2.90679	0.933645									2.68981	0.989743									3.72219	0.980294
		1.72854	0.884139									2.25956	0.840797									4.68711	0.978356
		1.56688	0.943015									3.13213	0.899478									4.39534	0.915225
		3.67465	0.929531									2.8955	0.844747									4.66922	0.980032
		1.93244	0.76318									5.9313	0.945396									12.1774	0.967634
		2.37675	0.915818									4.26968	0.904408									2.91361	0.989228
		4.26499	0.955934									2.61908	0.806186									1.98455	0.647051
		2.84613	0.846022									2.33574	0.916997									10.4288	0.774439
		1.41715	0.708173									4.02954	0.785225									10.4465	0.940251
		3.48567	0.94951									4.96245	0.684284									6.99533	0.991828
		1.7365	0.806276									2.61247	0.931218									4.43224	0.965546
		1.98534	0.922609									3.64018	0.923813									3.2947	0.958527
		1.63178	0.875107									7.5281	0.974568									5.75118	0.804552
		1.89676	0.556865									3.48402	0.912875									4.37443	0.827742
		1.62513	0.792183									1.63569	0.710239									6.72759	0.95915
		4.38041	0.972253									4.37732	0.866598									1.90745	0.88979
		1.09608	0.415441									2.76193	0.916213									4.21055	0.893658
		2.10275	0.756309									3.86895	0.942714									6.33013	0.842733
		3.49602	0.955438									2.19013	0.918793									5.15561	0.860271
		1.21814	0.427578									1.95888	0.506833									6.99041	0.923667
		4.08418	0.952615									3.61173	0.886359									5.63221	0.681917
		5.37325	0.883194									1.82915	0.727564									1.9781	0.882565
		1.23714	0.582831									8.77764	0.980127									3.81926	0.956595
		1.1161	0.209354									2.27797	0.90955									9.61987	0.937508
		1.52219	0.592114									7.54115	0.828046									9.37796	0.619597
		1.51858	0.803879									2.61685	0.850247									9.77884	0.992875
		2.39503	0.897136									1.55428	0.864745									2.88863	0.972237
		1.34082	0.703821									3.41085	0.765373									12.6904	0.827064
		2.52582	0.890162									2.69482	0.886328									3.56759	0.975292
		3.33968	0.958903									4.32196	0.962903									7.72558	0.986099
		1.19144	0.641556									5.95371	0.954312									5.41379	0.946942
		2.82609	0.927743									3.24276	0.945972									6.06298	0.925005
		1.94212	0.939322									4.2813	0.967554									11.9329	0.891864
		3.99336	0.926229									5.9824	0.938148									5.03684	0.901679
		1.85555	0.779242									8.48391	0.979002									9.31575	0.877178
		1.83307	0.795114									2.65847	0.642969									4.27297	0.970174
		2.66593	0.922935									3.51556	0.952233									5.2055	0.907394
		3.27385	0.978802									2.36271	0.880326									9.70531	0.983601
		2.51972	0.910054									5.47849	0.963613									6.62307	0.837778
		2.9195	0.875847									2.29728	0.87621									2.19168	0.971769
		2.07143	0.89409									2.03903	0.811979									5.18226	0.934449
		2.72828	0.913038									1.45081	0.916205									2.51534	0.887314
		3.28799	0.960286									1.59014	0.622364									3.50857	0.930381
		2.74398	0.918959									2.99296	0.892055									2.38052	0.9352
		2.1118	0.908718									1.22396	0.528885									3.74533	0.868488
		1.62703	0.757734									1.50579	0.654714									3.14769	0.885741
		1.08044	0.23086									1.2709	0.661111									9.24858	0.722016
		3.43009	0.957093									1.12408	0.380488									8.50599	0.882548
		1.44203	0.628454									2.99755	0.870376									3.5914	0.932193
		1.63966	0.817897									7.2883	0.967728									2.55055	0.824014
		2.26431	0.959672									4.74407	0.940808									6.11437	0.981343
		2.99	0.89966									3.21733	0.793577									7.08192	0.910623
		2.14192	0.939661									3.95864	0.808569									3.22056	0.895592
		1.39846	0.518828									1.32392	0.653481									4.48018	0.973437
		1.96765	0.83034									1.50711	0.767061									2.10977	0.951055
		3.52924	0.946089									3.41385	0.931805									5.74418	0.924057
		2.92716	0.919913									4.05978	0.953722									3.1674	0.962409
		2.84363	0.892676									4.23325	0.910792									3.58291	0.953453
		1.90773	0.838796									5.59116	0.89545									2.19596	0.773848
		1.86579	0.751125									7.25413	0.971241									4.37699	0.961126
		2.58851	0.916728									2.25164	0.871561									4.42208	0.931043
		2.6191	0.916045									1.29233	0.685369									1.93676	0.894241
		3.12066	0.938499									1.34314	0.761622									5.6247	0.97572
		3.10292	0.935955									4.31223	0.972078									3.59685	0.825103
		2.92362	0.933587									1.32615	0.503937									5.12904	0.924628
		3.69095	0.943772									2.83263	0.852502									3.337	0.935926
		3.64853	0.945249									3.65843	0.901377									3.42695	0.847615
		3.94357	0.957558									5.67709	0.959478									6.19089	0.887898
		1.12088	0.289987									4.94421	0.8285									1.12794	0.949287
		1.61399	0.535794									3.55486	0.894231									4.87121	0.945151
		1.14705	0.324801									1.82927	0.596046									11.9697	0.904326
		3.00034	0.888246									5.79194	0.958033									3.82743	0.79485
		2.41216	0.883363									4.48787	0.261103									5.5695	0.926541
		1.27082	0.845118									4.80804	0.928092									3.16203	0.816259
		1.51763	0.683649									6.37388	0.908107									9.66326	0.825224
		1.38056	0.731589									3.14949	0.861336									5.83403	0.95537
		2.29172	0.891659									2.48869	0.876247									5.11255	0.963835
		1.58915	0.862824									2.20715	0.937879									6.61734	0.843831
		1.78316	0.698916									6.03564	0.937065									3.66228	0.859562
		2.14149	0.924401									1.57553	0.54668									2.16401	0.428484
		1.32543	0.930524									1.15401	0.483238									1.60615	0.861784
		3.07608	0.9474									2.44544	0.76251									4.3105	0.887341
		4.64819	0.944664									2.40825	0.697722									6.58503	0.938948
		3.55382	0.959129									3.33167	0.876275									19.7328	0.993578
		3.38526	0.954741									8.44924	0.965711									7.57824	0.934704
		2.94101	0.886402									4.16134	0.912766									3.75766	0.971095
		2.54834	0.970497									1.48788	0.865607									16.9025	0.980143
		2.17206	0.926141									6.6983	0.969806									7.49901	0.889281
		3.02368	0.869301									5.5286	0.892415									1.75431	0.815566
		1.24581	0.595306									2.48418	0.921656									1.57008	0.974454
		1.17342	0.522184									2.96513	0.912106									2.20689	0.889968
		1.14875	0.59781									3.77011	0.948625									1.69232	0.869536
		3.74064	0.893821									6.98687	0.912276									9.6119	0.961937
		1.45348	0.656843									3.40526	0.84927									2.55804	0.988646
		1.27947	0.440894									3.23763	0.881397									15.0788	0.906364
		2.03228	0.731651									8.01275	0.932368									5.93222	0.974664
		2.27736	0.667053									4.96382	0.901704									10.9152	0.976659
		1.42502	0.397538									3.80718	0.710625									4.1452	0.878838
		1.65267	0.867979									3.36766	0.612851									4.08914	0.970126
		3.66799	0.639083									1.35625	0.95633									6.74949	0.959652
		1.97166	0.862053									3.8388	0.915242									3.37247	0.97778
		1.60267	0.891447									5.05642	0.79987									3.81582	0.942277
		1.47688	0.751031									2.51999	0.964885									3.09755	0.916649
		1.67872	0.8658									7.28213	0.924036									18.3425	0.983947
		2.95183	0.816041									2.86415	0.91711									10.7255	0.987092
		2.29935	0.91625									1.9853	0.870402									3.76128	0.985388
		1.73059	0.760459									2.99251	0.926299									15.4329	0.952723
		1.6211	0.793537									5.39173	0.967769									4.43258	0.889162
		2.34762	0.93313									2.32381	0.769464									3.71132	0.897586
		1.11104	0.411018									8.44421	0.967755									5.5912	0.932257
		2.01779	0.867497									1.65511	0.359648									3.54368	0.958293
		1.23827	0.599128									3.4307	0.356193									8.82306	0.926013
		2.23397	0.722026									1.88715	0.614981									6.05194	0.900431
		1.53375	0.751358									3.02273	0.640681									12.1718	0.920882
		1.6886	0.376319									6.78792	0.912597									4.90691	0.938546
		2.08472	0.804146									2.97566	0.86981									2.41801	0.819275
		1.64656	0.69926									1.36004	0.477442									5.5952	0.977938
		1.66747	0.868053									2.46207	0.760086									6.1897	0.977773
		1.40789	0.750305									2.19187	0.302593									2.37642	0.953506
		1.22373	0.571524									1.49051	0.748319									1.52559	0.873587
		1.55738	0.673567									7.51028	0.915738									1.67496	0.753838
		1.30169	0.614398									2.29131	0.662212									6.16069	0.896727
		2.28274	0.819059									4.86139	0.927785									3.77315	0.819802
		2.19161	0.563927									1.78661	0.953133									2.25243	0.673821
		4.3341	0.977292									3.19559	0.789639									6.38811	0.902443
		2.35702	0.861174									12.6457	0.513065									5.41812	0.96055
		2.02903	0.771967									2.95834	0.85023									5.98372	0.819071
		2.88643	0.939981									1.62191	0.830943									1.86284	0.88011
		1.78241	0.840079									4.39821	0.958566									5.14634	0.968092
		2.34433	0.887646									3.22821	0.773911									1.58304	0.678742
		1.58395	0.815917									2.83647	0.860669									5.82229	0.979642
		1.31363	0.678391									4.504	0.939733									2.45775	0.806515
		2.22428	0.758866									3.62527	0.8672									3.18801	0.808212
		2.02585	0.602008									6.36602	0.934285									3.83764	0.93784
		2.01912	0.842223									3.33382	0.643495									4.82787	0.986766
		2.22367	0.886188									1.43628	0.730487									5.20662	0.90617
		1.28434	0.569074									4.27625	0.83477									8.47455	0.939408
		1.37661	0.602532									3.5307	0.826463									3.96093	0.596577
		3.07948	0.780283									6.07764	0.853141									10.1254	0.966556
		1.22011	0.572524									4.17332	0.891445									9.46164	0.922934
		4.25135	0.944482									5.11941	0.869879									5.26792	0.94734
		1.13978	0.440799									2.73607	0.658516									1.79648	0.931534
		3.33004	0.946701									2.84917	0.777926									1.71407	0.897551
		3.78319	0.91511									3.35773	0.856693									5.13019	0.944463
		1.20602	0.565269									3.62112	0.898516									5.20811	0.952462
		2.45368	0.690952									5.79875	0.90853									2.32894	0.939294
		1.66208	0.812274									3.76699	0.977875									3.97116	0.857163
		1.12179	0.651003									4.19859	0.976737									1.43742	0.912692
		1.36486	0.67284									3.06306	0.822021									2.7635	0.867359
		2.50278	0.927531									2.86989	0.835386									2.83939	0.876859
		1.28611	0.692714									3.72346	0.948151									3.8922	0.97757
		1.17281	0.61629									3.11721	0.618618									3.25947	0.944638
		1.99857	0.870506									12.3102	0.954897									4.21144	0.973499
		2.39783	0.947294									4.38697	0.900498									3.09853	0.959698
		1.71031	0.750911									4.69803	0.944836									3.96	0.937825
		1.88435	0.633304									1.52692	0.823318									2.4894	0.883637
		1.19852	0.796057									7.20812	0.953524									4.20397	0.967171
		2.17078	0.730056									6.06978	0.935483									3.63581	0.966549
		1.26281	0.5533									4.5468	0.951373									2.7284	0.913872
		1.47631	0.381239									3.97477	0.932772									4.50346	0.95904
		2.47998	0.907365									2.93102	0.864057									1.56702	0.732558
		3.11558	0.942503									4.11856	0.919917									2.71298	0.945851
		2.86539	0.902685									5.71822	0.97212									4.77139	0.977533
		1.16996	0.443693									4.25103	0.706526									3.8224	0.917975
		3.68961	0.933561									1.51446	0.913046									4.89687	0.96491
		1.07981	0.34101									4.52722	0.960395									4.6466	0.970166
		1.10455	0.293487									3.0602	0.916226									2.80931	0.949979
		1.20452	0.578287									6.50176	0.899148									6.47892	0.942065
		1.57915	0.856102									3.5593	0.963629									3.59452	0.963355
		1.68021	0.772593									8.32654	0.966011									4.00008	0.949144
		2.25118	0.76204									5.29206	0.809903									3.34066	0.908779
		1.1494	0.378998									3.31319	0.877806									3.62589	0.953678
		1.27624	0.571668									3.77939	0.94047									3.42112	0.957063
		2.69813	0.899923									4.01357	0.950581									4.34749	0.978077
		1.17984	0.48398									3.79928	0.934749									3.41379	0.923925
		4.04543	0.952613									2.70345	0.819245									4.41858	0.955988
		2.21552	0.67106									7.14493	0.970017									4.21054	0.960814
		2.43176	0.845546									1.5057	0.63223									5.26145	0.940803
		1.26109	0.666958									5.80523	0.96499									5.28775	0.981444
		2.86339	0.900919									5.01878	0.758177									4.51988	0.964912
		3.45433	0.901289									1.1737	0.876934									2.50705	0.93415
		1.70184	0.602591									5.42464	0.960118									6.54253	0.958622
		2.91909	0.625897									3.38799	0.929438									5.51488	0.971624
		1.17677	0.587932									4.34855	0.657431									2.97445	0.904126
		1.41495	0.533272									7.42072	0.936146									1.6821	0.736662
		1.51544	0.697989									1.45302	0.854387									4.28001	0.827294
		1.45468	0.576199									5.37454	0.9429									2.07807	0.764811
		1.20332	0.534115									5.10405	0.919227									3.74691	0.963739
		1.21288	0.755895									4.97763	0.913782									7.71308	0.873144
		2.59013	0.889195									8.14273	0.930421									1.70699	0.937327
		3.54842	0.943007									5.35568	0.9533									10.6824	0.962929
		1.7658	0.733988									3.2287	0.530363									2.97136	0.963212
		2.13143	0.87646									2.43915	0.566601									3.4819	0.876316
		3.74592	0.968192									10.4142	0.969885									4.19898	0.984126
		1.7372	0.356952									8.22581	0.962607									3.03925	0.906903
		1.31313	0.640679									6.30315	0.908427									18.5536	0.96779
		1.43937	0.598453									2.55986	0.762322									7.36663	0.899486
		1.136	0.389505									1.98312	0.566426									5.54233	0.869387
		3.15965	0.902336									6.21688	0.955804									4.01984	0.798033
		1.58902	0.577497									5.50103	0.902743									3.60016	0.914031
		4.40093	0.976203									4.90778	0.92952									2.66134	0.892311
		2.00177	0.914761									9.98826	0.954318									2.26455	0.844006
		1.48528	0.889709									6.72239	0.753231									1.97723	0.694634
		1.10398	0.344836									1.49436	0.76076									2.15496	0.684545
		4.34537	0.957649									2.65785	0.820862									4.23685	0.900191
		4.28867	0.934889									1.44531	0.644933									5.22564	0.858498
		2.30578	0.671975									3.98809	0.933436									3.56951	0.929391
		1.20325	0.851068									3.20904	0.870188									2.16387	0.947485
		1.62102	0.718207									4.39531	0.659891									2.88684	0.852703
		1.89982	0.886565									1.49677	0.889565									4.23057	0.873251
		4.92942	0.970884									3.39924	0.905936									2.83408	0.666475
		3.32758	0.934826									1.61205	0.79502									2.53102	0.878375
		1.32522	0.742424									1.61069	0.484374									5.66465	0.866183
		2.22771	0.855532									2.48244	0.850038									5.65214	0.935072
		1.75501	0.473837									7.15405	0.80381									1.29734	0.9171
		2.60975	0.928801									1.31617	0.674983									6.69713	0.965996
		3.04389	0.90384									4.00125	0.912693									1.78405	0.889023
		1.34151	0.813516									1.56197	0.733906									5.79816	0.883059
		1.49226	0.344405									4.05655	0.846087									3.65752	0.950346
		3.98297	0.958681									3.44719	0.720398									6.43411	0.969596
		3.05355	0.915477									7.84137	0.972272									2.50009	0.930875
		1.40698	0.787637									7.928	0.951303									5.13439	0.684799
		1.93551	0.758877									2.16776	0.891762									3.77185	0.978944
		2.73966	0.884683									5.61144	0.946234									1.64626	0.833241
		2.78617	0.855471									5.5629	0.93603									4.13532	0.85123
		1.62491	0.7352									6.74217	0.921948									8.41214	0.975761
		4.02921	0.948976									2.01384	0.715948									5.6678	0.91145
		1.61609	0.392677									7.06216	0.849639									1.65342	0.805713
		2.34449	0.962992									5.21452	0.935241									1.78852	0.723084
		1.29573	0.579704									3.22479	0.962926									3.07485	0.859823
		1.50196	0.720554									3.24788	0.902271									2.14478	0.945045
		4.04876	0.950579									1.83462	0.804596									2.65386	0.925263
		2.39061	0.949884									3.05375	0.969817									1.64702	0.97062
		1.2821	0.515886									4.83511	0.981911									3.0882	0.959099
		5.21422	0.97038									5.33449	0.971654									6.3457	0.959795
		1.61284	0.556121									3.72137	0.876908									2.26212	0.916691
		3.10395	0.938153									2.5354	0.914049									3.90406	0.85992
		3.06576	0.9633									2.46003	0.56484									1.28205	0.881546
		1.15765	0.591057									2.35957	0.910599									7.52252	0.949673
		1.24343	0.539984									7.17061	0.80219									1.56061	0.87536
		2.19014	0.801459									1.72385	0.949754									2.21583	0.658614
		1.50882	0.743738									11.9025	0.865045									5.33432	0.897981
		1.37713	0.728533									5.48556	0.746617									6.23873	0.909158
		1.62269	0.685326									1.45316	0.954896									4.67484	0.983113
		2.42449	0.733584									2.95471	0.72121									6.56169	0.886859
		2.0573	0.848143									7.01365	0.957978									11.0891	0.965386
		3.39361	0.914471									10.1618	0.984825									1.92678	0.928965
		2.40611	0.873522									1.97113	0.627898									2.32732	0.980098
		1.62813	0.681168									9.44789	0.962582									4.44782	0.888193
		1.11201	0.427707									6.81594	0.965918									7.11166	0.968436
		2.75154	0.877728									7.93034	0.903957									3.74013	0.9242
		1.61801	0.718352									4.03534	0.958601									8.06486	0.884069
		1.84057	0.856918									4.45363	0.732551									1.88317	0.899911
		2.05051	0.902892									4.67052	0.953154									4.9146	0.887362
		1.2012	0.603193									4.63962	0.911598									3.74386	0.904983
		5.22919	0.964263									5.94619	0.815228									4.66207	0.995948
		4.8514	0.968514									3.23827	0.942635									5.51833	0.982689
		2.10831	0.694514									2.6728	0.784811									3.33105	0.952157
		2.59549	0.913584									8.67764	0.98547									2.37704	0.853537
		2.06125	0.717819									9.00413	0.937859									8.82755	0.975634
		2.49521	0.879256									6.07505	0.830387									2.2338	0.75039
		1.40546	0.797831									3.10415	0.930121									1.90723	0.905949
		3.38197	0.904652									2.15495	0.862265									3.40014	0.951053
		2.97909	0.9263									1.9625	0.681875									2.83282	0.912464
		4.06069	0.970789									2.77032	0.929212									1.97835	0.675413
		1.62987	0.556523									6.95281	0.911985									6.61731	0.918118
		2.37932	0.907366									7.11115	0.97489									6.09548	0.991091
		3.96633	0.930155									3.00935	0.963454									1.46609	0.957857
		1.51603	0.767449									6.23449	0.714437									2.13848	0.731104
		1.79811	0.390402									1.7703	0.660261									1.46326	0.854233
		3.31841	0.919504									4.72399	0.915024									1.42953	0.67301
		1.2662	0.520711									9.13491	0.918553									3.76555	0.956163
		1.22063	0.678391									4.79969	0.900871									7.64746	0.983334
		2.86922	0.865618									4.75167	0.900801									2.87369	0.879759
		2.78377	0.958523									7.2963	0.884087									1.41303	0.777508
		6.08615	0.973323									2.7624	0.946726									2.17394	0.942439
		2.9232	0.911538									8.8875	0.927148									1.90082	0.886674
		1.48311	0.793875									2.45179	0.812141									13.047	0.947187
		4.26768	0.965962									4.80045	0.889145									1.56178	0.961703
		1.72236	0.776808									7.4111	0.836307									2.51127	0.936445
		2.36846	0.913871									6.72746	0.970296									4.89694	0.965715
		3.20779	0.941622									5.6933	0.955837									2.86218	0.961221
		1.45991	0.791166									1.18689	0.611858									15.2785	0.991989
		1.09919	0.323298									2.27717	0.707303									9.92613	0.956715
		1.14501	0.514801									4.53094	0.952622									8.25099	0.979962
		3.51296	0.901534									6.55225	0.824416									6.82561	0.97455
		2.10431	0.738215									5.18277	0.943671									6.64367	0.495023
		2.93685	0.834633									4.67681	0.974777									4.2207	0.970305
		2.13418	0.860565									3.98937	0.904555									1.53813	0.857558
		2.3083	0.864086									3.94766	0.952312									8.09954	0.990025
		1.6751	0.496855									5.18351	0.957255									13.8663	0.973496
		1.57623	0.723079									5.7528	0.934842									1.86733	0.665834
		3.34073	0.913443									5.49107	0.979886									2.59022	0.952799
		2.12931	0.907113									2.52097	0.914706									2.51989	0.903172
		4.27461	0.944357									4.41966	0.883986									4.61096	0.841789
		1.86472	0.718951									2.69346	0.936274									2.41161	0.569207
		1.27512	0.930668									4.39455	0.968165									3.35643	0.939609
		1.24948	0.663665									4.07516	0.924527									2.92112	0.976017
		2.29845	0.809593									5.95274	0.861183									3.93527	0.665499
		1.1826	0.414303									3.49243	0.913502									5.37736	0.62666
		2.81193	0.938867									4.30412	0.92432									1.47447	0.754371
		2.91833	0.934358									5.36956	0.973725									4.98021	0.742802
		1.44874	0.751247									3.45256	0.875436									1.58509	0.88811
		2.31691	0.796029									3.03727	0.772391									1.27915	0.612919
		3.3491	0.943341									3.01134	0.929917									1.67969	0.873287
		1.25293	0.58556									3.37079	0.910205									5.35236	0.980646
		1.25838	0.670767									2.10545	0.778133									2.28484	0.85038
		2.6019	0.764393									1.3738	0.178965									2.08695	0.882795
		1.59622	0.778707									7.20026	0.961647									1.51365	0.865964
		1.51619	0.53074									2.02202	0.894075									1.89737	0.957296
		1.40084	0.557182									6.88605	0.964966									2.52343	0.942452
		1.7043	0.612669									6.60747	0.955339									3.02611	0.686312
		1.24047	0.51442									4.42191	0.913553									4.96952	0.950186
		1.41414	0.458057									1.34354	0.77895									6.31189	0.980558
		3.98788	0.938883									1.49166	0.557051									4.18076	0.962259
		1.19197	0.939162									5.37015	0.943641									3.84509	0.941526
		1.15175	0.153067									4.98985	0.950311									8.32697	0.692907
		1.35519	0.665808									3.50959	0.901724									1.36661	0.648676
		2.40897	0.892067									4.87177	0.932666									2.27897	0.926372
		1.89641	0.822075									1.47353	0.557432									8.56757	0.959938
		3.76152	0.932979									1.86948	0.594948									1.30749	0.674321
		2.35867	0.849728									7.35827	0.929303									1.58999	0.695442
		1.10838	0.219834									4.2284	0.969054									2.22104	0.933058
		1.42829	0.63559									4.95562	0.955555									7.25865	0.994357
		2.35012	0.923918									5.1286	0.976401									2.60105	0.949183
		1.18206	0.716624									6.12614	0.978829									2.41135	0.851916
		1.61845	0.675511									3.6853	0.954561									8.366	0.973013
		3.04542	0.890666									5.22851	0.894431									1.24348	0.837527
		4.95234	0.927918									3.05453	0.932229									1.68721	0.651422
		1.59057	0.714877									3.45579	0.527384									4.64396	0.983074
		1.77059	0.896231									2.05061	0.974281									4.65724	0.988763
		2.9157	0.92001									2.99834	0.90832									3.11895	0.639198
		1.5268	0.356381									2.07996	0.863255
		1.20644	0.530886									8.53184	0.886068
		4.90828	0.968644									1.73019	0.796299
		2.81064	0.830173									2.79614	0.534976
		3.33492	0.908696									3.8748	0.868739
		2.52241	0.887824									2.40458	0.879243
		1.39644	0.683489									2.34365	0.80288
		3.96907	0.966536									7.59175	0.919571
		1.32278	0.5821									2.95447	0.871979
		2.67488	0.868922									1.53791	0.79927
		1.6403	0.819555									2.34088	0.969663
		1.26035	0.816572									7.73748	0.977005
		1.85705	0.633643									3.95822	0.966587
		1.53076	0.848773									1.46654	0.883501
		1.08386	0.863148									1.40209	0.954654
		2.11195	0.879506									3.43572	0.742565
		1.19398	0.775466									2.96019	0.91733
		1.46657	0.771111									3.97402	0.945331
		2.59048	0.91677									5.06536	0.942477
		2.89444	0.929802									4.56686	0.951364
		1.37219	0.629191									3.48544	0.933603
		2.25362	0.871068									2.4608	0.590649
		1.32393	0.727133									1.86437	0.870271
		1.41523	0.811692									4.91378	0.94507
		1.23316	0.473317									6.59299	0.962313
		1.58995	0.395397									3.84337	0.892331
		4.38488	0.934554									1.32628	0.699478
		1.37272	0.671503									5.30728	0.969799
		3.81749	0.919889									1.4726	0.661431
		1.10969	0.44056									1.92455	0.82358
		1.24878	0.504965									5.86572	0.935633
		1.99121	0.741221									1.3589	0.697359
		1.21429	0.621007									2.57894	0.965446
		1.71476	0.838824									2.52323	0.880426
		2.48356	0.858833									4.24245	0.946619
		1.44611	0.725881									5.62483	0.951535
		1.15357	0.572402									2.12565	0.920999
		3.56249	0.939973
		1.6059	0.768499
		2.12372	0.840429
		1.50085	0.716936
		3.71632	0.948305
		1.45353	0.614523
		2.01913	0.740997
		3.239	0.904952
		2.49807	0.780287
		1.86427	0.836654
		1.34618	0.404878
		1.29212	0.893933
		1.42163	0.64537
		1.66581	0.504918
		2.11965	0.907649
		2.25472	0.757947
		1.49249	0.77148
		2.84662	0.82218
		2.86228	0.897601
		1.21839	0.473672
		1.29341	0.927811
		1.44224	0.666478
		1.1145	0.503381
		1.34146	0.783946
		1.34165	0.792074
		1.99586	0.841445
		2.25656	0.880638
		2.10699	0.849371
		2.45958	0.844824
		4.80045	0.889145
		7.4111	0.836307
		6.72746	0.970296
		5.6933	0.955837
		1.18689	0.611858
		2.27717	0.707303
		1.34931	0.756552
		4.53094	0.952622
		6.55225	0.824416
		5.18277	0.943671
		4.67681	0.974777
		3.98937	0.904555
		3.94766	0.952312
		5.64887	0.556565
		5.18351	0.957255
		5.7528	0.934842
		5.49107	0.979886
		2.52097	0.914706
		4.41966	0.883986
		2.69346	0.936274
		4.39455	0.968165
		4.07516	0.924527
		6.02887	0.957807
		5.95274	0.861183
		7.11115	0.97489
		3.49243	0.913502
		4.30412	0.92432
		2.17001	0.896733
		5.36956	0.973725
		3.45256	0.875436
		3.99262	0.95967
		3.03727	0.772391
		3.01134	0.929917
		3.37079	0.910205
		2.10545	0.778133
		1.3738	0.178965
		2.4242	0.867223
		2.02202	0.894075
		6.88605	0.964966
		6.60747	0.955339
		4.42191	0.913553
		1.34354	0.77895
		1.82514	0.895399
		1.49166	0.557051
		5.37015	0.943641
		4.98985	0.950311
		3.50959	0.901724
		4.87177	0.932666
		1.47353	0.557432
		5.61023	0.815166
		1.86948	0.594948
		7.35827	0.929303
		4.2284	0.969054
		4.95562	0.955555
		5.1286	0.976401
		6.12614	0.978829
		3.6853	0.954561
		5.22851	0.894431
		3.05453	0.932229
		3.45579	0.527384
		2.05061	0.974281
		2.99834	0.90832
		2.07996	0.863255
		8.53184	0.886068
		1.73019	0.796299
		2.79614	0.534976
		3.8748	0.868739
		2.40458	0.879243
		2.34365	0.80288
		4.74754	0.969825
		2.26906	0.88505
		7.59175	0.919571
		2.95447	0.871979
		1.53791	0.79927
		1.94246	0.871497
		2.34088	0.969663
		7.73748	0.977005
		2.39249	0.872252
		3.95822	0.966587
		1.46654	0.883501
		4.03545	0.953728
		2.39432	0.607727
		1.40209	0.954654
		3.43572	0.742565
		2.96019	0.91733
		3.97402	0.945331
		5.06536	0.942477
		4.56686	0.951364
		3.2307	0.858535
		4.32169	0.979083
		3.48544	0.933603
		2.4608	0.590649
		7.20026	0.961647
		1.86437	0.870271
		2.85442	0.882425
		4.91378	0.94507
		1.96544	0.863731
		6.59299	0.962313
		3.84337	0.892331
		1.32628	0.699478
		5.30728	0.969799
		1.4726	0.661431
		2.78465	0.94088
		2.17634	0.898481
		3.62286	0.991055
		2.06268	0.882849
		1.92455	0.82358
		1.66448	0.740756
		5.86572	0.935633
		1.3589	0.697359
		2.57894	0.965446
		2.52323	0.880426
		2.485	0.97289
		4.24245	0.946619
		1.69056	0.750814
		1.18535	0.599207
		4.38352	0.83953
		5.62483	0.951535
		2.12565	0.920999

## Sheet: Fig5. S3C
	Max/min feret diameter			Eccentricity				Max/min feret diameter			Eccentricity
3 DPE	Pax7+ MyoD-	Pax7+ MyoD+		Pax7+ MyoD-	Pax7+ MyoD+		7 DPE	Pax7+ MyoD-	Pax7+ MyoD+		Pax7+ MyoD-	Pax7+ MyoD+
	2.91175	2.63654		0.894472	0.798032			5.44372	2.68982		0.880968	0.836446
	3.46147	3.63244		0.873737	0.751333			5.43885	1.84186		0.860554	0.857628
	2.33122	3.13404		0.857901	0.810819			5.77684	2.20152		0.918368	0.823325
	2.94216	3.242		0.835677	0.811361			3.06494	2.86797		0.938927	0.800667
	3.02242	2.5952		0.787981	0.796283			3.86689	2.30782		0.847978	0.857748
	2.89449	2.90135		0.835354	0.781718			5.28872	3.75951		0.853292	0.762948
	3.66267	2.69903		0.838149	0.781786			5.3284	3.51158		0.892174	0.768283
	3.71225	4.07405		0.820871	0.808962			3.94311	3.00433		0.944228	0.860005
	4.60735	2.03948		0.870621	0.809263			4.27036	2.05884		0.890275	0.836611
	3.80601	3.42383		0.810801	0.84919			4.13031	2.61588		0.872074	0.84411
	3.71619	2.45061		0.873558	0.846273			3.87555			0.827609
	3.28053			0.8902
*values represent technical replicates from all biological replicates
