# Supplementary material for: The mini-IDLE 3D biomimetic culture assay enables interrogation of mechanisms governing muscle stem cell quiescence and niche repopulation
Source: eLife. 2022 Dec 20;11:e81738. doi: 10.7554/eLife.81738 (PMC9904761; doi:10.7554/eLife.81738)
Supplement: Figure 5—figure supplement 4—source data 1. — Data for subpanels separated into tabs. [file elife-81738-fig5-figsupp4-data1.xlsx]

## Sheet: Fig5. S4B
Days post-engraftment	Control										+Y-27632
1	13.9089	10.3597	8.63309	16.4029	5.65947	5.7554	3.83693				16.4988	8.82494	14.2926	13.8561	15.5156	12.9496	11.0312	5.85132	6.04317
3	19.5444	9.59233	20.9113	11.7026	0.671463	7.29017	8.34532	7.0024			9.8801	8.72902	15.4436	20.3237	9.40048	19.8561	2.68585	12.3741	7.48201
7	6.52278	11.3189	13.8129	7.38609	11.7026	3.35731	9.8801	6.61871	4.70024		2.58993	4.79616	9.8801	12.6619	7.57794	9.11271	11.9185	5.46763	3.45324
*values represent technical replicates from all biological replicates

## Sheet: Fig5. S4C
	1	3	7		1	3	7
Days post-engraftment	93.6066	40	33.0358	5	85.3919	22.0055	8.9479
	93.8144	33.3333	10.125		70.1626	34.8366	13.0162		% c-FOS+
	80.8101	36.3158	23.6752		76.7656	37.9583	13.9627
	73.2475	37.0482	16.8576		56.4429	17.0175	20.3896
	67.971	24.6094	24.6544		82.4692	27.451	40.8631
	77.7966	47.9167	17.3953		50.5651	22.9412	21.5476
*values represent technical replicates from all biological replicates

## Sheet: Fig5. S4D
Days post-engraftment	1	3	7		1	3	7
	6.2069	22.7273	2.94118		10.4651	5.82524	7.40741
	1.85185	17	4.23729		13.0435	3.2967	10		% MyoD
	14.4444	19.2661	4.16667		10.7383	19.8758	9.70874
	12.2807	26.3934	24.6753		8.69565	5.30303	3.78788
	5.08475	28.5714	13.1148		15.9323	12.2449	6.32911
	10	40.7895	17.1429		14.8148	12.5604	5.26316
	4	26.4368	17.4757		14.7826	10.7143	5
		53.4247	14.4928		6.55738	9.30233	7.01754
			12.2449		10.2222	11.5385	8.33333
*values represent technical replicates from all biological replicates
