# Supplementary material for: The mini-IDLE 3D biomimetic culture assay enables interrogation of mechanisms governing muscle stem cell quiescence and niche repopulation
Source: eLife. 2022 Dec 20;11:e81738. doi: 10.7554/eLife.81738 (PMC9904761; doi:10.7554/eLife.81738)
Supplement: Figure 5—figure supplement 5—source data 1. — Data for subpanels separated into tabs. [file elife-81738-fig5-figsupp5-data1.xlsx]

## Sheet: Fig5. S5A
	Max/min feret diameter (bin upper limit)	1 DPE				3 DPE				7 DPE
		Control	Y-27632			Control	Y-27632			Control	Y-27632
	1	0	0			0	0			0	0		*values represent percentage for each bin (biological replicates combined)
	1.25	21.6216	15.6972			4.22535	0.690846			4.98084	2.84281
	1.5	18.9189	15.2988			11.2676	3.79965			7.53512	5.35117
	1.75	11.5616	8.9243			11.8712	5.00864			6.25798	5.35117
	2	9.75976	9.48207			10.5634	6.39033			5.23627	6.52174
	2.25	10.6607	7.33068			9.75855	5.69948			4.85313	4.34783
	2.5	5.10511	7.56972			4.82897	5.87219			5.23627	5.18395
	2.75	4.35435	4.62151			5.93561	4.83592			6.25798	3.51171
	3	2.85285	4.7012			4.62777	4.31779			5.36398	4.68227
	3.25	2.7027	4.22311			5.4326	4.66321			3.83142	3.67893
	3.5	2.7027	3.34661			4.02414	4.31779			3.06513	3.84615
	3.75	2.4024	2.47012			2.41449	3.7133			1.78799	1.50502
	4	1.8018	3.34661			2.8169	3.62694			3.06513	3.17726
	4.25	1.5015	2.62948			1.81087	3.45423			2.55428	3.34448
	4.5	1.05105	2.15139			2.31388	2.76339			3.06513	2.67559
	4.75	1.05105	1.91235			1.91147	3.36788			2.80971	3.84615
	5	0.15015	0.956175			1.50905	3.62694			2.55428	2.84281
	5.25	0.45045	0.956175			1.00604	2.9361			1.91571	3.34448
	5.5	0.3003	0.557769			0.905433	2.15889			3.19285	2.84281
	5.75	0	0.876494			0.905433	1.89983			1.78799	3.01003
	6	0	0.557769			1.10664	2.15889			1.91571	2.34114
	6.25	0.45045	0.557769			1.30785	2.41796			1.66028	1.33779
	6.5	0	0.239044			0.503018	1.5544			1.14943	1.67224
	6.75	0.15015	0.159363			1.00604	1.72712			2.04342	2.00669
	7	0	0.557769			0.804829	1.12263			1.27714	2.34114
	7.25	0.15015	0.159363			0.402414	1.38169			1.02171	1.50502
	7.5	0	0.318725			0.301811	1.64076			1.91571	1.17057
	7.75	0	0.0796813			0.905433	1.5544			1.14943	1.17057
	8	0.15015	0.0796813			0.503018	1.12263			0.893997	1.17057
	8.25	0.15015	0			0.704225	1.03627			0.510856	1.33779
	8.5	0	0.0796813			0.301811	0.777202			0.63857	1.33779
	8.75	0	0			0.402414	1.72712			1.14943	1.00334
	9	0	0.159363			0.201207	0.777202			0.383142	1.00334
	9.25	0	0			0.301811	0.949914			0.63857	0.668896
	9.5	0	0			0.201207	0.690846			0.510856	0.668896
	9.75	0	0			0.402414	0.345423			0.383142	0.334448
	10	0	0			0.402414	0.604491			0.766284	0.334448
	10.25	0	0			0.201207	0.172712			0.63857	0.334448
	10.5	0	0			0.402414	0.259067			0.893997	0.668896
	10.75	0	0			0.201207	0.259067			0.510856	0.501672
	11	0	0			0.201207	0.690846			0.383142	0.501672
	11.25	0	0			0	0.259067			0.510856	0.501672
	11.5	0	0			0.100604	0.518135			0.383142	0.501672
	11.75	0	0			0	0.431779			0	0.167224
	12	0	0			0.201207	0.345423			0.127714	0.167224
	12.25	0	0			0	0.172712			0.383142	0.334448
	12.5	0	0			0	0.431779			0.510856	0.167224
	12.75	0	0			0	0.259067			0.63857	0.334448
	13	0	0			0.301811	0.259067			0	0.167224
	13.25	0	0			0	0.172712			0.255428	0.167224
	13.5	0	0			0	0.259067			0	0.167224
	13.75	0	0			0.100604	0.0863558			0.255428	0.167224
	14	0	0			0.100604	0			0	0.334448
	14.25	0	0			0	0			0.255428	0
	14.5	0	0			0	0.172712			0	0.167224
	14.75	0	0			0	0.172712			0.127714	0
	15	0	0			0	0.172712			0.127714	0
	15.25	0	0			0	0.0863558			0	0.334448
	15.5	0	0			0.100604	0			0.127714	0
	15.75	0	0			0	0			0.127714	0
	16	0	0			0	0.0863558			0	0.167224
	16.25	0	0			0	0			0	0
	16.5	0	0			0	0			0	0
	16.75	0	0			0.100604	0			0.127714	0.334448
	17	0	0			0	0			0	0
	17.25	0	0			0	0			0	0.167224
	17.5	0	0			0	0			0	0
	17.75	0	0			0	0			0	0
	18	0	0			0	0			0.127714	0
	18.25	0	0			0	0			0	0
	18.5	0	0			0	0			0	0
	18.75	0	0			0	0			0	0
	19	0	0			0	0			0	0
	19.25	0	0			0	0			0	0
	19.5	0	0			0.100604	0			0	0.167224
	19.75	0	0			0	0			0	0
	20	0	0			0	0			0	0

## Sheet: Fig5. S5B
Max/min feret diameter		Pax7+ MyoD-															Pax7+ MyoD+
1 DPE	Control	1.96795	1.92306	1.99987	1.97052	2.55231	2.18245	2.28957									1.49687	1.32977	1.56957	1.69707	2.24466	2.32779
	+Y-27632	2.3997	2.86696	2.52831	2.58969	1.97549	2.59277	2.70854	2.32709	1.93686							2.46941	3.05904	2.79983	3.04171	2.25005	2.33983	2.07069	2.2386	2.37175
3 DPE	Control	3.32572	2.84572	3.16719	3.45316	1.74883	3.91129	4.19639	3.49065								2.71878	2.08381	2.15319	2.30333	1.47755	2.30912	2.7334	3.41624
	+Y-27632	4.01202	4.14806	5.04936	4.33732	4.02837	4.83808	4.0808	4.96222	5.84502							3.30872	2.83272	3.19015	4.44065	3.2551	5.22379	2.92845	3.78499	5.6751
7 DPE	Control	4.96828	4.24984	4.45452	4.48371	5.06108	4.92066	4.1614	4.09362	5.33045							1.20625	1.5671	1.61783	3.60375	2.96644	3.62149	2.81317	1.9633	1.49846
	+Y-27632	4.24783	4.86928	3.8893	5.23692	4.92021	4.35521	4.65678	5.96955	4.62849							4.84297	3.19781	3.08989	3.96162	2.00691	2.55498	3.61806	1.92593

## Sheet: Fig5. S5C
Nuclear eccentricity		Pax7+ MyoD-															Pax7+ MyoD+
1 DPE	Control	0.709762	0.714753	0.704381	0.688399	0.842809	0.776399	0.671502									0.61317	0.488025	0.677302	0.641763	0.837547	0.710719
	+Y-27632	0.706047	0.757344	0.738043	0.728625	0.614148	0.718388	0.750001	0.752291	0.674828							0.710765	0.761152	0.77613	0.72275	0.594732	0.668029	0.653059	0.663932	0.720316
3 DPE	Control	0.804018	0.771319	0.784459	0.876266	0.723537	0.846234	0.786261	0.785953								0.785023	0.676322	0.753901	0.758827	0.704582	0.749674	0.617457	0.741864
	+Y-27632	0.836574	0.824188	0.857561	0.831779	0.82253	0.848234	0.823425	0.864984	0.861219							0.736715	0.881948	0.801302	0.822461	0.753521	0.849549	0.921171	0.84313	0.897472
7 DPE	Control	0.813809	0.835745	0.811301	0.817412	0.825453	0.788953	0.821274	0.790063	0.863951							0.793434	0.765353	0.71154	0.702231	0.701111	0.747284	0.802423	0.718322	0.681933
	+Y-27632	0.743063	0.785748	0.764535	0.786568	0.810827	0.807951	0.783849	0.823457	0.825969							0.752069	0.72204	0.743225	0.83755	0.800048	0.859172	0.900167	0.727256

## Sheet: Fig5. S5E
Mean branches/MuSC		Pax7+ MyoD-															Pax7+ MyoD+
1 DPE	Control	0.269231	0.333333	0.209677	0.146067	0.162162	1.0566	0.64									0.0526316	0.142857	0.0588235	0.111111	0.166667	0.8125	0.181818
	+Y-27632	0.632075	0.426471	0.405941	0.803922	0.801587	0.847059	0.494949	1.75385	0.674419							0.47619	0.266667	0.607143	0.65625	0.915789	1		0.333333	0.5	0.769231
3 DPE	Control	1.91026	1.23077	1.97126	1.69444	1	2.5625	1.77778	2.15385								1.90909	1	1.71053	1.47368	0.5	1.44828	1.33333	1.5
	+Y-27632	3.02083	2.08333	2.23276	1.7438	2.48235	1.50556	1.72222	3.69231	1.50556							3.75	1.75	2.41379	1.72727	2	2.92	2.5	2.77778	1.66667
7 DPE	Control	3.40351	4.40741	4.53636	2.70968	3.2451	2.55882	2.07407	2.03636	2.58974							1	3	3.5	2.75	1.92308	3.28571	3.07692	1.06667	0.454545
	+Y-27632	3.24242	4.03509	3.79808	2.70796	3.79104	3.21591	4.73684	3.89091	4.16667							2.66667	6	4.77778	4	4.44444	3	4	2.66667

## Sheet: Fig5. S5F
Mean skeleton length/MuSC		Pax7+ MyoD-															Pax7+ MyoD+
1 DPE	Control	55.0053	54.8984	57.7715	60.2511	169.209	174.819	82.0262									34.4984	38.0273	25.9834	35.5649	64.9366	124.417	30.2772
	+Y-27632	79.3377	80.24	74.4638	103.461	82.5428	113.493	90.9784	139.324	79.8126							75.7393	112.07	91.4575	109.515	95.8519	117.526	62.4337	73.7696	92.9526
3 DPE	Control	283.005	196.066	303.915	288.13	89.5624	245.7	269.004	302.722								239.041	114.002	176.812	176.624	86.2696	174.226	210.649	233.417
	+Y-27632	402.847	367.072	416.408	340.616	255.932	246.525	315.798	307.041	246.525							483.756	220.365	404.976	259.308	271.13	244.182	444.462	321.636	236.869
7 DPE	Control	621.337	549.337	580.223	507.173	471.356	564.967	320.147	385.786	383.804							212.341	418.289	311.136	499.496	259.373	484.574	352.908	145.179	183.197
	+Y-27632	322.82	540.167	465.363	463.424	420.091	438.498	583.456	573.84	312.174							301.918	603.646	357.11	674.557	438.174	247.001	197.431	375.009	292.054
