# Supplementary material for: The mini-IDLE 3D biomimetic culture assay enables interrogation of mechanisms governing muscle stem cell quiescence and niche repopulation
Source: eLife. 2022 Dec 20;11:e81738. doi: 10.7554/eLife.81738 (PMC9904761; doi:10.7554/eLife.81738)
Supplement: Figure 5—source data 1. — Data for subpanels separated into tabs. [file elife-81738-fig5-data1.xlsx]

## Sheet: Fig. 5C
1 DPE		Max/Min Feret Diameter	Eccentricity		3 DPE		Max/Min Feret Diameter	Eccentricity		7 DPE		Max/Min Feret Diameter	Eccentricity
		4.20472	0.936521				1.86212	0.787855				1.99473	0.897037
		1.07805	0.313188				3.00008	0.902578				15.9484	0.959789
		2.43659	0.917907				2.42226	0.90751				3.09504	0.685204
		2.3968	0.269316				1.06364	0.465533				7.55644	0.97384		*Values represent individual cells
		2.73825	0.898995				1.32391	0.290346				2.13153	0.89969
		1.31281	0.520798				1.27383	0.440983				1.72976	0.851318
		1.50677	0.220759				1.60941	0.821224				4.60273	0.937811
		2.08288	0.86753				2.53642	0.76189				4.58791	0.927027
		3.16507	0.929444				3.57741	0.968192				3.68492	0.854741
		2.12897	0.882208				4.16328	0.957449				2.44529	0.595318
		1.06144	0.487728				4.07981	0.69226				3.67151	0.851335
		1.12674	0.856022				2.46276	0.908359				4.86215	0.887415
		1.19154	0.444707				4.30285	0.872679				1.43415	0.817285
		2.2656	0.875386				2.54553	0.923175				2.65369	0.949142
		1.70775	0.929542				1.29962	0.605128				1.85629	0.938161
		2.29269	0.886533				2.56891	0.862299				3.77726	0.782825
		1.34057	0.792905				1.54421	0.703323				1.27702	0.730235
		1.30507	0.789319				1.68211	0.802574				1.75762	0.940576
		2.89617	0.890908				5.64486	0.960128				2.31686	0.898568
		1.27245	0.7169				3.92466	0.943359				2.06035	0.796616
		3.24771	0.895064				2.12254	0.919032				3.2599	0.939253
		2.5588	0.958085				3.32224	0.619022				4.08945	0.975229
		1.09432	0.288105				2.14076	0.927678				6.61305	0.777096
		1.65745	0.752701				4.82031	0.989286				6.70417	0.920638
		1.32368	0.744373				3.02665	0.405054				12.0482	0.904923
		1.29289	0.417111				4.50931	0.933481				16.6015	0.950076
		1.44983	0.46825				1.90814	0.818917				2.72647	0.845098
		3.40161	0.933593				2.73498	0.932983				2.15551	0.83597
		1.46181	0.607331				1.47635	0.547355				2.84887	0.813723
		1.24401	0.622943				2.34194	0.737901				3.94159	0.923798
		2.62711	0.820739				1.2132	0.534072				2.79721	0.96327
		5.21805	0.971474				1.18718	0.463189				8.937	0.69837
		1.19977	0.581436				1.88425	0.769438				2.41079	0.826318
		2.13565	0.839605				1.78778	0.776931				4.4242	0.800902
		1.32061	0.858839				2.48003	0.887379				2.99608	0.938136
		1.09921	0.357068				3.56339	0.936605				2.65757	0.925567
		1.15858	0.441438				3.92636	0.827243				9.35002	0.895181
		2.19796	0.849827				1.52415	0.775793				1.6409	0.839667
		3.25711	0.63892				5.80321	0.921466				12.2885	0.967358
		1.30014	0.754747				3.43812	0.896621				9.93198	0.952045
		2.39069	0.789803				3.03356	0.926499				1.84186	0.857628
		2.46411	0.919515				4.4743	0.970465				6.64455	0.82713
		1.49724	0.886654				2.32991	0.890813				2.95374	0.937041
		2.12876	0.549557				2.56233	0.8915				10.2815	0.934541
		1.35339	0.533425				3.2441	0.860235				11.4733	0.906669
		1.48353	0.688374				5.69122	0.905952				9.14578	0.918955
		1.24804	0.620153				1.5852	0.712654				4.04285	0.983669
		5.95804	0.981262				1.46388	0.863936				5.41315	0.736712
		1.44488	0.754954				1.79606	0.828197				4.2488	0.952412
		1.85105	0.768505				1.31832	0.658168				5.50112	0.921594
		1.42982	0.75882				3.84297	0.93206				5.50981	0.935476
		1.17121	0.280957				2.03843	0.796502				5.5676	0.903576
		1.07279	0.301567				2.46518	0.833547				1.59775	0.864693
		3.12255	0.892616				2.90886	0.925244				2.93486	0.910824
		1.30922	0.694309				2.03179	0.793439				4.45494	0.90679
		2.78552	0.904453				2.02914	0.840782				8.03339	0.985054
		3.66142	0.945685				2.68985	0.907719				5.35702	0.894516
		3.44168	0.946386				1.86126	0.767952				2.26895	0.825616
		2.7657	0.893224				1.44265	0.609537				4.10834	0.813507
		1.79892	0.754295				2.46661	0.830076				1.75925	0.793059
		1.71506	0.759976				4.94	0.950354				2.73728	0.804066
		1.36341	0.684435				1.19737	0.246539				4.73186	0.917203
		2.51034	0.531763				1.29696	0.622417				2.42858	0.858268
		1.29284	0.26194				7.96281	0.975863				10.5025	0.923127
		1.19151	0.337068				5.30689	0.884758				2.41822	0.854402
		4.92003	0.95266				5.249	0.958099				2.74107	0.862499
		1.93013	0.8798				5.65882	0.947446				5.12487	0.815455
		2.54153	0.738398				1.13333	0.531023				9.13901	0.902963
		2.65658	0.856591				1.13696	0.292084				14.8497	0.977949
		4.72344	0.969544				1.23791	0.591922				17.6194	0.962035
		3.05484	0.922212				1.94494	0.751019				6.05475	0.986639
		5.55785	0.934563				5.12117	0.977241				1.97618	0.83531
		2.13914	0.833882				5.82001	0.922942				9.81777	0.951347
		2.62243	0.835728				1.19648	0.69904				6.31365	0.936403
		1.1951	0.547776				3.29018	0.967412				1.63308	0.947724
		1.19875	0.856432				5.85651	0.838373				5.33621	0.849809
		1.42227	0.774171				2.70233	0.718072				2.22383	0.748566
		1.8213	0.369391				2.41999	0.772028				7.62877	0.916276
		1.19477	0.478024				3.14167	0.954387				2.68713	0.952873
		1.10468	0.330354				3.80695	0.914401				2.10941	0.751775
		4.38254	0.906733				1.48495	0.382477				6.81649	0.837452
		2.20852	0.905957				1.2783	0.567677				8.59089	0.924081
		1.9143	0.869439				2.22679	0.917612				4.67947	0.868109
		1.97778	0.85574				1.54686	0.766951				3.19575	0.892665
		2.72259	0.903027				1.22756	0.568131				2.77428	0.902708
		1.63731	0.70094				1.12955	0.453379				1.81808	0.815962
		1.48227	0.748086				1.98676	0.959959				1.71591	0.693777
		1.75489	0.778028				2.52387	0.872224				2.21718	0.843056
		1.11417	0.351504				2.30655	0.573297				3.71553	0.816099
		2.2252	0.854252				3.05192	0.822712				2.75397	0.886211
		1.97249	0.621499				2.38895	0.900471				6.66255	0.907575
		1.34672	0.625284				1.66456	0.733841				3.71316	0.844836
		2.82806	0.803514				1.32572	0.597494				6.50204	0.848408
		1.18341	0.526175				1.7302	0.83659				8.45079	0.914237
		2.09088	0.804911				1.28362	0.576217				3.45758	0.9071
		1.36097	0.609615				4.49589	0.848546				5.69699	0.762245
		1.22716	0.353491				2.2896	0.851351				2.12465	0.973958
		1.31039	0.595388				2.37998	0.882762				6.38583	0.827398
		1.64941	0.675671				3.52706	0.965468				6.201	0.85562
		1.37203	0.535389				1.56568	0.419715				12.0985	0.903305
		1.6758	0.230501				13.6134	0.973787				5.61745	0.84865
		1.74281	0.80186				2.10189	0.624323				9.1618	0.873233
		1.18184	0.468393				3.68557	0.974998				8.94565	0.876072
		1.57383	0.752286				1.67844	0.706815				4.18237	0.88651
		1.87159	0.78003				3.30854	0.882346				14.9511	0.939729
		1.25519	0.430166				1.51623	0.958494				3.784	0.951045
		1.44904	0.765146				1.44655	0.501065				6.93931	0.868401
		1.33253	0.755125				1.32644	0.641169				4.1894	0.571899
		2.12189	0.79288				1.61527	0.65263				7.33785	0.879385
		1.41585	0.516809				1.60222	0.53787				4.01856	0.869962
		2.03717	0.902039				1.40902	0.588172				3.43017	0.831671
		1.93879	0.891049				1.7669	0.739744				3.15853	0.888447
		3.20506	0.926971				1.48312	0.819431				3.10665	0.865865
		2.89784	0.616546				2.47108	0.862144				5.10901	0.790064
		5.77071	0.895537				1.33406	0.885483				7.37565	0.902432
		2.20124	0.844547				1.8696	0.756131				12.5946	0.963468
		2.02982	0.735227				1.23436	0.675376				5.80345	0.908
		2.25027	0.957639				7.20629	0.802986				5.38706	0.795864
		2.37259	0.709414				1.63733	0.939793				3.92365	0.619235
		2.76101	0.891098				1.66112	0.679704				2.72199	0.860464
		1.63011	0.40537				11.8281	0.93351				1.54073	0.938608
		2.36907	0.837526				2.71402	0.594026				8.59484	0.9471
		1.35628	0.401174				2.91078	0.731209				4.43748	0.957585
		1.33929	0.393355				2.77987	0.940934				3.11544	0.79092
		1.71801	0.63631				5.36783	0.886686				3.43503	0.922928
		3.87101	0.939408				2.4932	0.891348				3.04742	0.91335
		1.4715	0.646857				3.64671	0.949255				1.84427	0.881239
		2.68893	0.904844				2.45192	0.955192				9.12586	0.994532
		1.15554	0.355036				1.70317	0.642295				13.7375	0.948761
		2.63999	0.883539				5.03715	0.91578				8.93949	0.945601
		1.49155	0.566919				1.89304	0.780966				4.9995	0.852563
		1.80563	0.813652				1.60261	0.818575				4.9207	0.941251
		2.16291	0.868978				2.65795	0.80949				10.3996	0.935485
		1.41323	0.74698				2.19794	0.807777				5.79282	0.945136
		3.97013	0.965593				2.31588	0.841314				2.57635	0.951624
		2.9245	0.882983				3.63966	0.830775				2.98671	0.948668
		2.33998	0.847935				3.99892	0.963494				3.38034	0.963473
		3.98426	0.94164				2.19551	0.831789				1.82509	0.933121
		1.31703	0.844505				4.25556	0.960165				3.66596	0.974312
		1.63039	0.535881				2.02034	0.86251				4.23407	0.980161
		1.72572	0.411121				4.08378	0.69291				4.40466	0.979547
		2.3991	0.846333				1.35542	0.810037				1.52053	0.78538
		1.72393	0.747231				1.76118	0.642238				2.58514	0.929785
		1.2457	0.351654				6.88226	0.879293				2.95768	0.926273
		1.14342	0.438242				2.84826	0.936751				3.57779	0.95586
		3.69584	0.911158				1.26648	0.631221				3.61305	0.772529
		1.78449	0.920204				2.64392	0.854373				2.77949	0.935554
		2.51946	0.868669				4.65448	0.96639				12.3824	0.969681
		2.76162	0.855972				4.1586	0.963533				3.02848	0.963852
		2.45434	0.812435				8.01275	0.932368				6.1536	0.940599
		1.09588	0.458651				4.28344	0.970098				1.9596	0.882928
		1.61111	0.769625				4.60037	0.827007				3.10875	0.792314
		1.26642	0.534206				1.27454	0.970765				3.9813	0.975309
		2.95222	0.935818				1.35647	0.642298				3.68902	0.971633
		1.56893	0.621229				3.94863	0.894531				1.65939	0.548085
		1.60934	0.750955				1.47266	0.819464				2.81136	0.512157
		2.29962	0.887731				2.55125	0.930334				2.05409	0.908243
		1.16698	0.781258				4.4832	0.978423				3.04904	0.850831
		1.1397	0.439445				4.42286	0.946329				2.00336	0.838702
		3.89635	0.96887				3.3343	0.953678				5.10747	0.884611
		2.49193	0.883729				1.24459	0.763512				2.18694	0.970743
		3.47519	0.889444				2.59841	0.92665				2.99375	0.868147
		4.11139	0.950289				3.59426	0.983735				4.79315	0.942141
		1.32577	0.29963				5.20959	0.662304				2.38191	0.785672
		1.56394	0.467985				2.9686	0.886819				6.23564	0.86631
		2.53583	0.89185				2.79863	0.920122				4.33871	0.929944
		2.26353	0.837414				1.56761	0.8483				3.22988	0.969143
		3.4244	0.931945				2.91128	0.944879				2.68012	0.9338
		1.62325	0.546978				3.00235	0.833416				11.6742	0.9804
		1.20985	0.48572				1.89909	0.648443				2.60256	0.787392
		2.63203	0.894957				1.35817	0.623105				4.45452	0.958123
		1.56772	0.90197				2.57665	0.853544				3.60679	0.965151
		2.58101	0.790754				2.94942	0.865845				2.14677	0.898965
		1.13638	0.271408				4.81623	0.780827				4.72936	0.982976
		2.19355	0.87065				1.46333	0.979069				2.30782	0.917748
		1.74009	0.828796				1.27278	0.700549				2.67696	0.931957
		1.2766	0.540901				3.23614	0.638151				1.35168	0.422673
		2.66084	0.91701				4.06099	0.90305				3.1588	0.76626
		1.67628	0.787601				3.56453	0.924936				6.28047	0.656526
		2.7948	0.905724				8.44421	0.967755				5.74098	0.880785
		1.3509	0.715615				6.56534	0.985823				4.70326	0.776976
		2.92321	0.93849				6.8832	0.939039				3.7126	0.706377
		1.87787	0.932257				3.61467	0.864277				7.36479	0.923702
		1.44292	0.647805				3.9754	0.808548				2.54752	0.800314
		1.14742	0.315372				4.45595	0.874392				9.8073	0.979118
		2.28683	0.891612				2.0398	0.580365				4.49708	0.645035
		1.33617	0.668879				3.26495	0.911789				2.00122	0.567518
		1.93077	0.854638				2.45443	0.937618				5.9291	0.956782
		2.39747	0.909275				2.91942	0.86047				8.34185	0.940029
		1.78952	0.836397				3.21193	0.921576				3.91198	0.984537
		2.00416	0.883281				1.78584	0.965165				4.08683	0.896194
		1.98307	0.820939				6.02258	0.944919				5.40907	0.95234
		2.85281	0.923777				3.88116	0.967844				1.63153	0.509886
		1.6644	0.816071				8.45776	0.96281				2.85649	0.899978
		1.72232	0.826395				1.20746	0.625412				3.3291	0.955635
		2.17264	0.85352				3.83751	0.89402				5.75996	0.938462
		2.37047	0.865121				1.35723	0.449821				3.14206	0.655809
		2.15354	0.924903				3.64942	0.93158				11.3203	0.873739
		1.56702	0.915972				4.85151	0.874936				1.4955	0.836969
		1.59834	0.874094				1.0984	0.467982				4.29736	0.839636
		3.6675	0.961169				1.67108	0.852755				9.03902	0.905221
		2.59143	0.870938				3.28922	0.8662				4.30059	0.924582
		2.2492	0.86615				6.79458	0.832782				5.58381	0.914915
		2.17386	0.833291				3.85061	0.801103				10.4776	0.960095
		1.45734	0.955494				1.62195	0.788504				18.9122	0.936723
		3.86984	0.95149				1.86812	0.727237				7.25842	0.920328
		2.37647	0.906678				1.6746	0.876406				6.14766	0.950881
		2.74958	0.915254				1.27696	0.612506				4.60693	0.908045
		1.84296	0.971543				1.81189	0.563169				8.78558	0.923496
		3.23408	0.947053				2.99861	0.73549				3.37083	0.677739
		1.55395	0.886504				2.85545	0.835316				2.76196	0.774384
		2.43686	0.8991				2.99231	0.914399				1.68471	0.556457
		2.07861	0.861917				1.90136	0.883031				8.0441	0.817543
		1.60494	0.669154				1.96575	0.794081				2.14596	0.650425
		2.21234	0.877934				5.35522	0.959611				7.89575	0.834444
		2.96225	0.925711				1.69911	0.663406				5.0396	0.867564
		3.18447	0.894204				3.84189	0.719966				2.54104	0.862415
		3.23471	0.948187				6.3598	0.711305				2.16649	0.934584
		1.38735	0.386898				1.68589	0.742646				2.43966	0.794444
		2.51884	0.917712				1.36574	0.62189				1.66567	0.717602
		2.41751	0.876211				2.28161	0.809925				3.92057	0.714564
		2.38678	0.938287				1.46708	0.814753				3.70386	0.895775
		2.67245	0.938242				1.97911	0.903578				1.30257	0.532292
		2.32366	0.946122				1.46859	0.819903				4.68898	0.902681
		2.98461	0.946033				2.77851	0.979681				8.74299	0.969638
		2.45747	0.879321				5.76877	0.945241				7.14828	0.908088
		1.53166	0.880145				3.5533	0.752344				7.24746	0.88474
		2.075	0.887446				2.17986	0.702694				1.93422	0.592351
		1.71353	0.897112				4.61971	0.845548				4.55912	0.897243
		3.01266	0.8276				1.57182	0.530855				4.38533	0.830743
		1.85294	0.932215				1.34412	0.740556				3.21227	0.815086
		1.98028	0.796795				4.31222	0.982303				4.44299	0.695207
		2.04818	0.837989				2.06906	0.600473				3.98286	0.977042
		2.27545	0.922806				1.6527	0.647116				1.25896	0.765718
		3.01534	0.931802				1.40661	0.698845				13.5352	0.953391
		1.26795	0.671374				2.78572	0.948533				1.40266	0.796323
		2.55563	0.88832				2.03346	0.784643				5.21837	0.922368
		1.98437	0.727882				1.16691	0.422557				10.5071	0.890805
		2.49633	0.912389				1.16494	0.52915				8.87474	0.942063
		1.77099	0.811425				1.3399	0.643445				5.83804	0.818191
		2.97122	0.939482				2.80153	0.863667				13.6391	0.928635
		1.83489	0.827037				3.38391	0.802471				6.20787	0.955575
		1.62553	0.650387				1.49867	0.838941				4.15547	0.728159
		2.20732	0.847292				1.40796	0.688075				2.1234	0.464609
		2.91336	0.934215				2.84673	0.903269				5.30131	0.745921
		2.15309	0.922717				3.84848	0.875837				11.4043	0.860569
		1.98823	0.878919				2.93624	0.715447				9.41561	0.913414
		2.24682	0.938008				2.60734	0.920292				3.48789	0.631351
		3.45254	0.940097				3.63566	0.795013				15.0705	0.960146
		4.25165	0.949937				2.11472	0.777154				2.2433	0.718616
		1.7397	0.834875				2.79008	0.586896				2.94183	0.804062
		2.47011	0.855774				2.92559	0.909141				9.61581	0.9533
		1.53787	0.685912				2.87839	0.790065				13.6738	0.995048
		2.77531	0.897626				3.6811	0.947985				9.15025	0.961601
		1.40463	0.737335				4.78326	0.915867				4.39094	0.907265
		1.59837	0.814144				2.68663	0.802908				5.77816	0.809709
		1.31576	0.664888				4.39587	0.857391				5.29999	0.73984
		3.17421	0.954779				4.77715	0.910049				6.11363	0.888803
		2.58398	0.902484				3.13246	0.887617				4.41085	0.817369
		2.29465	0.901239				2.69738	0.878976				5.07416	0.733366
		2.7791	0.84865				4.56335	0.894431				4.86281	0.81352
		1.24516	0.675577				4.31491	0.911141				3.80229	0.909798
		2.03095	0.828127				1.56	0.792423				4.50276	0.817699
		2.41975	0.881825				1.7766	0.811803				8.12481	0.982819
		2.77262	0.924286				2.76638	0.846499				5.65444	0.957682
		2.47722	0.945833				2.0347	0.794743				9.87803	0.921918
		1.79973	0.84471				1.17841	0.844348				4.99142	0.83795
		1.23429	0.860538				4.36133	0.795887				9.03662	0.925915
		2.7316	0.931819				1.57633	0.685144				6.51274	0.957818
		1.78081	0.842649				2.09053	0.937727				6.06399	0.954574
		1.8548	0.852233				1.3937	0.468174				7.76101	0.922583
		3.00961	0.958176				3.31	0.920723				3.34969	0.86978
		2.95921	0.969224				2.35536	0.84716				5.49128	0.892098
		2.63881	0.934055				3.30999	0.907694				3.9918	0.774316
		2.20063	0.939584				2.81029	0.906299				4.34235	0.932878
		1.68165	0.834603				2.83084	0.696176				5.12929	0.674253
		2.36686	0.922239				4.2718	0.963953				2.61172	0.916707
		2.1373	0.874826				3.25902	0.937349				1.79799	0.628354
		1.7199	0.810884				4.72161	0.889111				2.99043	0.925781
		1.43425	0.945666				3.77467	0.937949				5.19589	0.895635
		3.39009	0.697787				2.69243	0.876919				3.1633	0.959298
		1.37685	0.684087				10.3497	0.948292				4.92101	0.925269
		1.27617	0.617554				4.14844	0.933813				4.99342	0.985096
		1.30564	0.665856				4.23858	0.92969				1.83568	0.725252
		2.08999	0.911348				1.40028	0.62372				5.33023	0.877529
		1.14433	0.516868				1.40052	0.710307				2.45927	0.9385
		3.05093	0.935934				1.60951	0.827527				3.8336	0.771701
		2.07223	0.826333				6.66962	0.884876				6.39243	0.915958
		2.2864	0.869427				3.39485	0.861183				5.84846	0.952525
		1.70817	0.814445				3.34549	0.904541				2.79055	0.912165
		2.85916	0.911412				2.29579	0.671059				1.19779	0.948208
		3.59138	0.963502				1.64476	0.946946				4.90901	0.965316
		2.18528	0.897644				2.78514	0.787687				2.91305	0.725201
		2.1511	0.929873				1.80083	0.521576				2.62264	0.855773
		2.19874	0.870427				1.36426	0.458203				1.99907	0.689797
		1.48333	0.947127				2.76505	0.883672				1.41653	0.878691
		1.79352	0.9257				4.4023	0.933273				5.86874	0.944976
		1.64292	0.907877				5.88176	0.88564				2.34873	0.797158
		2.38526	0.865929				3.35703	0.979571				3.82314	0.882448
		2.0601	0.941494				4.44066	0.9615				3.70393	0.774988
		2.36907	0.870201				1.14533	0.690442				2.77377	0.968649
		2.98585	0.888394				2.75475	0.822986				2.00062	0.907933
		2.13421	0.88267				7.79095	0.915397				11.0555	0.980156
		3.14933	0.944113				6.56247	0.88317				3.08741	0.814976
		1.72892	0.81678				4.81306	0.941374				6.65063	0.939727
		1.38702	0.9831				4.504	0.939733				2.87906	0.928224
		1.16799	0.623164				7.3907	0.681887				5.50028	0.861567
		2.84447	0.892634				1.70649	0.91893				4.22946	0.851238
		2.33257	0.86632				4.16325	0.588946				7.88856	0.942966
		1.951	0.831142				2.59289	0.796167				5.34862	0.926032
		3.39171	0.973091				2.77701	0.707727				6.71022	0.836829
		1.82607	0.925059				3.68297	0.611789				3.45275	0.810027
		2.36484	0.788888				4.93578	0.853587				9.81109	0.923197
		1.78973	0.87253				3.58566	0.959944				2.96822	0.742178
		2.20745	0.727039				4.47058	0.766952				3.22837	0.674113
		1.48241	0.934258				4.01653	0.956377				6.86892	0.950746
		2.1084	0.878216				3.98412	0.946087				1.86715	0.731429
		2.17385	0.830723				5.74092	0.962747				4.95478	0.975051
		2.66928	0.96912				2.59049	0.828532				2.29816	0.763224
		2.55568	0.936952				3.24559	0.893091				4.01993	0.991186
		3.41684	0.711194				1.61245	0.676749				5.94335	0.881301
		1.83245	0.84546				7.56546	0.856904				7.36856	0.886433
		1.9194	0.78568				1.60979	0.734761				2.61556	0.898854
		2.54329	0.0868078				2.61446	0.806924				5.50766	0.960373
		2.14524	0.851423				3.70511	0.924787				2.77464	0.81274
		1.83203	0.791392				2.04983	0.893962				7.54408	0.88573
		1.34191	0.632245				1.25993	0.844052				3.18059	0.762911
		3.3857	0.939594				2.12913	0.697171				5.44097	0.947881
		1.39856	0.816076				1.63184	0.720929				7.53268	0.82728
		1.29662	0.763886				1.10018	0.330823				1.31124	0.97445
		1.66779	0.822074				3.87895	0.870222				5.24428	0.637938
		1.33998	0.715931				1.32361	0.867677				5.44865	0.9459
		2.0981	0.873138				2.62678	0.490409				1.56364	0.580516
		1.6179	0.815409				1.66243	0.535035				4.05073	0.913911
		2.8285	0.921324				1.61635	0.794161				1.559	0.675012
		1.38348	0.553056				1.59934	0.730765				3.24533	0.978362
		4.05352	0.970179				1.40091	0.570817				3.8425	0.913214
		1.72404	0.929321				1.80896	0.908404				2.27607	0.620497
		2.07878	0.929029				2.54807	0.886836				3.59344	0.926978
		2.53341	0.921				5.44851	0.7595				6.44133	0.989977
		1.60795	0.744545				2.6577	0.690214				4.63191	0.927331
		1.19435	0.602383				3.26473	0.94953				1.91626	0.785766
		1.22301	0.599275				4.73679	0.876584				3.51085	0.966901
		1.76901	0.78778				4.00632	0.744494				11.0996	0.991257
		1.3361	0.767708				5.80552	0.841731				13.705	0.983503
		1.94244	0.81878				4.91253	0.971122				9.13537	0.931489
		2.90679	0.933645				6.86896	0.982378				5.96608	0.978218
		1.72854	0.884139				2.02946	0.965045				3.15923	0.931379
		1.56688	0.943015				5.74788	0.925633				13.0572	0.994005
		3.67465	0.929531				13.9991	0.961609				3.50587	0.917269
		1.93244	0.76318				1.87889	0.630683				1.19908	0.862977
		2.37675	0.915818				3.92746	0.820991				3.96791	0.840311
		4.26499	0.955934				3.73834	0.911933				5.6092	0.93948
		2.84613	0.846022				1.09835	0.383576				5.41861	0.847897
		1.41715	0.708173				1.14031	0.409768				3.66268	0.901231
		3.48567	0.94951				2.12215	0.76689				4.48097	0.907183
		1.7365	0.806276				5.08862	0.929615				2.87025	0.83956
		1.98534	0.922609				1.54028	0.686811				5.65675	0.98632
		1.63178	0.875107				1.86802	0.834578				3.4603	0.525504
		1.89676	0.556865				1.83554	0.953713				3.15541	0.950743
		1.62513	0.792183				2.34983	0.836844				3.49856	0.710801
		4.38041	0.972253				1.2275	0.94779				5.41267	0.868604
		1.09608	0.415441				5.8627	0.905507				2.17701	0.956347
		2.10275	0.756309				4.66494	0.976271				2.17765	0.959664
		3.49602	0.955438				1.75357	0.696816				10.9598	0.92491
		1.21814	0.427578				5.33894	0.979852				3.89346	0.907145
		4.08418	0.952615				1.81525	0.591313				17.2721	0.949518
		5.37325	0.883194				2.26072	0.927109				3.14542	0.872457
		1.23714	0.582831				4.52722	0.960395				9.83161	0.861317
		1.1161	0.209354				1.50868	0.795393				1.9436	0.933506
		1.52219	0.592114				4.93293	0.922013				4.00005	0.99424
		1.51858	0.803879				1.53544	0.512909				2.34808	0.937081
		2.39503	0.897136				1.9587	0.689553				8.09356	0.859302
		1.34082	0.703821				4.05091	0.943935				1.76186	0.683499
		2.52582	0.890162				3.56272	0.838819				2.43566	0.842527
		3.33968	0.958903				1.81339	0.769969				1.41901	0.614208
		1.19144	0.641556				1.42523	0.765222				1.79136	0.705558
		2.82609	0.927743				1.91251	0.899678				3.54285	0.987632
		1.94212	0.939322				5.82981	0.96092				4.10043	0.908724
		3.99336	0.926229				6.83991	0.895841				1.43796	0.576622
		1.85555	0.779242				1.34094	0.731365				2.11136	0.60949
		1.83307	0.795114				1.66458	0.824909				3.1969	0.820824
		2.66593	0.922935				2.58348	0.693537				4.81976	0.803432
		3.27385	0.978802				5.08386	0.538294				1.9782	0.847196
		2.51972	0.910054				1.58905	0.836343				4.28773	0.965087
		2.9195	0.875847				1.79246	0.630201				4.05928	0.857461
		2.07143	0.89409				3.00365	0.955382				3.72219	0.980294
		2.72828	0.913038				6.5828	0.956235				4.68711	0.978356
		3.28799	0.960286				3.89788	0.824584				4.39534	0.915225
		2.74398	0.918959				4.7544	0.906052				4.66922	0.980032
		2.1118	0.908718				2.95297	0.980125				12.1774	0.967634
		1.62703	0.757734				3.29739	0.839564				1.7868	0.961895
		1.08044	0.23086				1.28744	0.653066				2.91361	0.989228
		3.43009	0.957093				1.64228	0.914614				1.98455	0.647051
		1.44203	0.628454				3.74664	0.825911				10.4288	0.774439
		1.63966	0.817897				1.39421	0.761269				5.42109	0.948733
		2.26431	0.959672				1.53029	0.382904				10.4465	0.940251
		2.99	0.89966				4.42602	0.960986				6.99533	0.991828
		2.14192	0.939661				1.44274	0.92415				4.43224	0.965546
		1.39846	0.518828				1.90505	0.974974				3.2947	0.958527
		1.96765	0.83034				4.89079	0.940001				5.75118	0.804552
		3.52924	0.946089				3.36381	0.798536				4.37443	0.827742
		2.92716	0.919913				2.53355	0.478702				6.72759	0.95915
		2.84363	0.892676				1.55748	0.548267				1.90745	0.88979
		1.90773	0.838796				1.653	0.718693				2.67372	0.903432
		1.86579	0.751125				1.49235	0.437807				4.21055	0.893658
		2.58851	0.916728				3.97336	0.936852				6.33013	0.842733
		2.6191	0.916045				5.91967	0.910653				5.15561	0.860271
		3.12066	0.938499				1.72628	0.625947				6.99041	0.923667
		3.10292	0.935955				2.90166	0.696362				5.63221	0.681917
		2.92362	0.933587				4.95434	0.658371				1.9781	0.882565
		3.69095	0.943772				2.33391	0.978137				3.81926	0.956595
		3.64853	0.945249				5.46612	0.801823				9.61987	0.937508
		3.94357	0.957558				2.13006	0.891164				9.37796	0.619597
		1.12088	0.289987				1.7856	0.776422				9.77884	0.992875
		1.61399	0.535794				1.54696	0.690696				2.88863	0.972237
		1.14705	0.324801				3.41918	0.865661				12.6904	0.827064
		3.00034	0.888246				2.16999	0.782331				3.56759	0.975292
		2.41216	0.883363				3.48771	0.805188				7.72558	0.986099
		1.27082	0.845118				2.3434	0.91618				5.41379	0.946942
		1.51763	0.683649				1.19153	0.291661				6.06298	0.925005
		1.38056	0.731589				3.20408	0.794653				11.9329	0.891864
		2.29172	0.891659				1.74201	0.823412				5.03684	0.901679
		1.58915	0.862824				3.87091	0.821007				9.31575	0.877178
		1.78316	0.698916				1.76189	0.862978				4.27297	0.970174
		2.14149	0.924401				1.66413	0.607879				5.2055	0.907394
		1.32543	0.930524				1.80643	0.880938				9.70531	0.983601
		3.07608	0.9474				4.5046	0.978213				6.62307	0.837778
		4.64819	0.944664				4.54923	0.953001				2.19168	0.971769
		3.55382	0.959129				2.34582	0.973343				5.18226	0.934449
		3.38526	0.954741				5.68743	0.948627				2.51534	0.887314
		2.94101	0.886402				3.27416	0.556344				3.50857	0.930381
		2.54834	0.970497				1.4452	0.559706				2.38052	0.9352
		2.17206	0.926141				2.25915	0.502051				3.74533	0.868488
		3.02368	0.869301				3.71989	0.706578				3.14769	0.885741
		1.24581	0.595306				2.51076	0.858864				9.24858	0.722016
		1.17342	0.522184				1.60731	0.842579				8.50599	0.882548
		1.14875	0.59781				3.38348	0.928726				3.5914	0.932193
		3.74064	0.893821				1.81916	0.878849				2.55055	0.824014
		1.45348	0.656843				3.88594	0.936669				6.11437	0.981343
		1.27947	0.440894				5.4084	0.892911				7.08192	0.910623
		1.15244	0.549981				1.50988	0.920686				3.22056	0.895592
		2.03228	0.731651				4.31311	0.819777				4.48018	0.973437
		2.27736	0.667053				2.12127	0.899693				2.10977	0.951055
		1.42502	0.397538				1.88017	0.879299				5.74418	0.924057
		1.65267	0.867979				1.64296	0.908894				3.1674	0.962409
		3.66799	0.639083				2.8063	0.95579				3.58291	0.953453
		1.97166	0.862053				3.56656	0.864571				2.19596	0.773848
		1.60267	0.891447				4.08287	0.624077				4.37699	0.961126
		1.47688	0.751031				7.63762	0.962338				4.42208	0.931043
		1.67872	0.8658				2.61979	0.457546				1.93676	0.894241
		2.95183	0.816041				3.21129	0.9245				5.6247	0.97572
		2.29935	0.91625				3.97516	0.939956				3.59685	0.825103
		1.73059	0.760459				2.98212	0.953412				5.12904	0.924628
		1.6211	0.793537				1.98072	0.854432				3.337	0.935926
		2.34762	0.93313				3.36257	0.822062				3.42695	0.847615
		1.11104	0.411018				2.39366	0.930352				6.19089	0.887898
		2.01779	0.867497				1.52686	0.748144				1.12794	0.949287
		1.23827	0.599128				3.15262	0.887567				4.87121	0.945151
		2.23397	0.722026				3.04699	0.814014				11.9697	0.904326
		1.53375	0.751358				5.32941	0.915958				3.82743	0.79485
		1.6886	0.376319				3.35157	0.73156				6.35002	0.976706
		2.08472	0.804146				1.47525	0.647011				5.5695	0.926541
		1.64656	0.69926				1.96635	0.832725				3.16203	0.816259
		1.66747	0.868053				4.46927	0.713371				9.66326	0.825224
		1.40789	0.750305				2.82807	0.924624				5.83403	0.95537
		1.22373	0.571524				2.14738	0.546956				5.11255	0.963835
		1.55738	0.673567				2.16646	0.86508				6.61734	0.843831
		1.30169	0.614398				2.45822	0.849973				3.66228	0.859562
		2.28274	0.819059				2.13156	0.812335				2.16401	0.428484
		2.19161	0.563927				2.6681	0.907554				1.60615	0.861784
		4.3341	0.977292				4.3852	0.955759				4.3105	0.887341
		2.35702	0.861174				3.46068	0.926477				6.58503	0.938948
		2.02903	0.771967				6.13346	0.972781				19.7328	0.993578
		2.88643	0.939981				9.39946	0.904798				7.57824	0.934704
		1.78241	0.840079				5.12626	0.885429				3.75766	0.971095
		2.34433	0.887646				5.26951	0.875102				16.9025	0.980143
		1.58395	0.815917				8.14273	0.930421				7.49901	0.889281
		1.31363	0.678391				4.03147	0.866248				1.75431	0.815566
		2.22428	0.758866				1.97114	0.784333				1.57008	0.974454
		2.02585	0.602008				5.15979	0.897212				2.20689	0.889968
		2.01912	0.842223				5.8415	0.957115				1.69232	0.869536
		2.22367	0.886188				2.96633	0.903671				9.6119	0.961937
		1.28434	0.569074				6.02376	0.96371				2.55804	0.988646
		1.37661	0.602532				3.27494	0.952171				8.208	0.939839
		3.07948	0.780283				1.31147	0.470706				4.98588	0.914452
		1.22011	0.572524				4.14337	0.923664				15.0788	0.906364
		4.25135	0.944482				4.51594	0.944415				5.93222	0.974664
		1.13978	0.440799				4.52059	0.862643				10.9152	0.976659
		3.33004	0.946701				4.90592	0.846002				4.1452	0.878838
		3.78319	0.91511				1.49289	0.758854				4.08914	0.970126
		1.20602	0.565269				3.95191	0.969184				6.74949	0.959652
		2.45368	0.690952				1.67647	0.893208				3.37247	0.97778
		1.66208	0.812274				2.02531	0.934811				3.81582	0.942277
		1.12179	0.651003				4.72541	0.805565				3.09755	0.916649
		1.36486	0.67284				2.61662	0.866751				18.3425	0.983947
		2.50278	0.927531				1.30138	0.853273				10.7255	0.987092
		1.28611	0.692714				4.12929	0.908742				3.76128	0.985388
		1.17281	0.61629				10.4142	0.969885				15.4329	0.952723
		1.99857	0.870506				7.48144	0.844439				4.43258	0.889162
		2.39783	0.947294				7.5113	0.867173				3.71132	0.897586
		1.71031	0.750911				2.5629	0.981173				5.5912	0.932257
		1.88435	0.633304				1.72015	0.656516				3.54368	0.958293
		1.19852	0.796057				5.78617	0.786074				8.82306	0.926013
		2.17078	0.730056				5.83598	0.730199				6.05194	0.900431
		1.26281	0.5533				5.1834	0.961797				12.1718	0.920882
		1.47631	0.381239				2.87298	0.960053				4.90691	0.938546
		2.47998	0.907365				5.30079	0.93987				2.41801	0.819275
		3.11558	0.942503				4.43858	0.9077				5.5952	0.977938
		2.86539	0.902685				2.68981	0.989743				6.1897	0.977773
		1.16996	0.443693				2.25956	0.840797				2.37642	0.953506
		3.68961	0.933561				3.13213	0.899478				1.52559	0.873587
		1.07981	0.34101				2.85629	0.842633				1.67496	0.753838
		1.10455	0.293487				2.8955	0.844747				6.16069	0.896727
		1.20452	0.578287				5.9313	0.945396				3.77315	0.819802
		1.57915	0.856102				4.26968	0.904408				2.25243	0.673821
		1.68021	0.772593				10.0729	0.979664				6.38811	0.902443
		2.25118	0.76204				2.61908	0.806186				5.41812	0.96055
		1.1494	0.378998				2.33574	0.916997				5.98372	0.819071
		1.27624	0.571668				4.02954	0.785225				1.86284	0.88011
		2.69813	0.899923				4.96245	0.684284				5.14634	0.968092
		1.17984	0.48398				2.61247	0.931218				1.58304	0.678742
		4.04543	0.952613				3.64018	0.923813				5.82229	0.979642
		2.21552	0.67106				7.5281	0.974568				2.45775	0.806515
		2.43176	0.845546				3.48402	0.912875				1.96557	0.852041
		1.26109	0.666958				1.63569	0.710239				3.18801	0.808212
		2.86339	0.900919				4.37732	0.866598				3.83764	0.93784
		3.45433	0.901289				1.49599	0.730527				4.82787	0.986766
		1.70184	0.602591				2.76193	0.916213				5.20662	0.90617
		2.91909	0.625897				3.86895	0.942714				8.47455	0.939408
		1.17677	0.587932				2.19013	0.918793				3.96093	0.596577
		1.41495	0.533272				2.13231	0.875845				10.1254	0.966556
		1.51544	0.697989				1.95888	0.506833				9.46164	0.922934
		1.45468	0.576199				3.61173	0.886359				5.26792	0.94734
		1.20332	0.534115				1.82915	0.727564				1.79648	0.931534
		1.21288	0.755895				2.17803	0.853844				1.71407	0.897551
		2.59013	0.889195				8.77764	0.980127				5.13019	0.944463
		3.54842	0.943007				4.99456	0.973437				5.20811	0.952462
		1.7658	0.733988				2.27797	0.90955				2.32894	0.939294
		2.13143	0.87646				7.54115	0.828046				3.97116	0.857163
		3.74592	0.968192				2.61685	0.850247				1.43742	0.912692
		1.7372	0.356952				1.55428	0.864745				2.7635	0.867359
		1.31313	0.640679				3.41085	0.765373				2.83939	0.876859
		1.43937	0.598453				2.69482	0.886328				3.8922	0.97757
		1.136	0.389505				4.32196	0.962903				3.25947	0.944638
		3.15965	0.902336				5.95371	0.954312				4.21144	0.973499
		1.58902	0.577497				3.24276	0.945972				3.09853	0.959698
		4.40093	0.976203				4.2813	0.967554				3.96	0.937825
		2.00177	0.914761				5.9824	0.938148				2.4894	0.883637
		1.06144	0.544729				5.65754	0.85638				4.20397	0.967171
		1.48528	0.889709				8.48391	0.979002				3.63581	0.966549
		1.10398	0.344836				2.65847	0.642969				2.7284	0.913872
		4.34537	0.957649				3.51556	0.952233				4.50346	0.95904
		4.28867	0.934889				2.36271	0.880326				1.56702	0.732558
		2.30578	0.671975				5.47849	0.963613				2.71298	0.945851
		1.20325	0.851068				2.36362	0.941379				4.77139	0.977533
		1.62102	0.718207				1.73936	0.770529				3.8224	0.917975
		1.89982	0.886565				2.29728	0.87621				4.89687	0.96491
		4.92942	0.970884				3.73706	0.905614				4.6466	0.970166
		3.32758	0.934826				2.03903	0.811979				2.80931	0.949979
		1.32522	0.742424				1.45081	0.916205				6.47892	0.942065
		2.22771	0.855532				1.59014	0.622364				3.59452	0.963355
		1.75501	0.473837				2.99296	0.892055				4.00008	0.949144
		2.60975	0.928801				1.22396	0.528885				3.34066	0.908779
		3.04389	0.90384				1.50579	0.654714				3.62589	0.953678
		1.34151	0.813516				1.2709	0.661111				3.42112	0.957063
		1.49226	0.344405				1.12408	0.380488				4.34749	0.978077
		3.98297	0.958681				2.02093	0.750644				3.41379	0.923925
		3.05355	0.915477				2.99755	0.870376				4.41858	0.955988
		1.40698	0.787637				7.2883	0.967728				4.21054	0.960814
		1.93551	0.758877				4.74407	0.940808				5.26145	0.940803
		2.73966	0.884683				3.21733	0.793577				5.28775	0.981444
		2.78617	0.855471				3.95864	0.808569				4.51988	0.964912
		1.62491	0.7352				1.25543	0.697992				2.50705	0.93415
		4.02921	0.948976				1.32392	0.653481				6.54253	0.958622
		1.61609	0.392677				1.50711	0.767061				1.77941	0.741184
		2.34449	0.962992				3.41385	0.931805				5.51488	0.971624
		1.29573	0.579704				4.05978	0.953722				2.97445	0.904126
		1.50196	0.720554				4.23325	0.910792				1.6821	0.736662
		4.04876	0.950579				5.59116	0.89545				4.28001	0.827294
		2.39061	0.949884				7.25413	0.971241				2.07807	0.764811
		1.2821	0.515886				1.42583	0.741052				3.74691	0.963739
		5.21422	0.97038				2.25164	0.871561				7.71308	0.873144
		1.61284	0.556121				1.29233	0.685369				1.70699	0.937327
		3.10395	0.938153				1.34314	0.761622				10.6824	0.962929
		3.06576	0.9633				4.31223	0.972078				2.97136	0.963212
		1.15765	0.591057				1.32615	0.503937				3.4819	0.876316
		1.24343	0.539984				2.83263	0.852502				4.19898	0.984126
		2.19014	0.801459				3.65843	0.901377				3.03925	0.906903
		1.50882	0.743738				5.67709	0.959478				18.5536	0.96779
		1.37713	0.728533				4.94421	0.8285				7.36663	0.899486
		1.62269	0.685326				3.55486	0.894231				5.54233	0.869387
		2.42449	0.733584				1.82927	0.596046				4.01984	0.798033
		2.0573	0.848143				6.15737	0.831765				3.60016	0.914031
		3.39361	0.914471				7.96709	0.923112				2.66134	0.892311
		2.40611	0.873522				5.79194	0.958033				2.26455	0.844006
		1.62813	0.681168				4.48787	0.261103				1.97723	0.694634
		1.11201	0.427707				2.56344	0.778883				2.15496	0.684545
		2.75154	0.877728				4.80804	0.928092				4.23685	0.900191
		1.61801	0.718352				3.56944	0.961929				5.22564	0.858498
		1.84057	0.856918				6.37388	0.908107				3.56951	0.929391
		2.05051	0.902892				3.14949	0.861336				2.16387	0.947485
		1.2012	0.603193				2.48869	0.876247				2.88684	0.852703
		5.22919	0.964263				2.20715	0.937879				4.23057	0.873251
		4.8514	0.968514				6.03564	0.937065				2.83408	0.666475
		2.10831	0.694514				1.57553	0.54668				2.53102	0.878375
		2.59549	0.913584				1.15401	0.483238				5.66465	0.866183
		2.06125	0.717819				2.4407	0.752277				5.65214	0.935072
		2.49521	0.879256				2.44544	0.76251				2.63468	0.941695
		1.40546	0.797831				2.40825	0.697722				1.76244	0.826955
		3.38197	0.904652				3.33167	0.876275				1.29734	0.9171
		2.97909	0.9263				8.44924	0.965711				6.69713	0.965996
		4.06069	0.970789				4.16134	0.912766				1.78405	0.889023
		1.62987	0.556523				1.48788	0.865607				5.79816	0.883059
		2.37932	0.907366				3.27951	0.756924				3.65752	0.950346
		3.96633	0.930155				6.6983	0.969806				6.43411	0.969596
		1.51603	0.767449				2.26929	0.951719				2.50009	0.930875
		1.79811	0.390402				5.5286	0.892415				5.13439	0.684799
		3.31841	0.919504				1.66834	0.812004				3.77185	0.978944
		1.2662	0.520711				2.48418	0.921656				1.64626	0.833241
		1.22063	0.678391				1.30985	0.94532				4.13532	0.85123
		2.86922	0.865618				2.96513	0.912106				8.41214	0.975761
		2.78377	0.958523				3.77011	0.948625				5.6678	0.91145
		6.08615	0.973323				6.98687	0.912276				1.65342	0.805713
		2.9232	0.911538				3.40526	0.84927				1.78852	0.723084
		1.48311	0.793875				3.23763	0.881397				3.07485	0.859823
		4.26768	0.965962				2.51027	0.732026				2.14478	0.945045
		1.72236	0.776808				2.75108	0.649306				2.65386	0.925263
		2.36846	0.913871				2.99675	0.909676				1.64702	0.97062
		3.20779	0.941622				4.96382	0.901704				3.0882	0.959099
		1.45991	0.791166				2.23184	0.811406				6.3457	0.959795
		1.07805	0.452279				3.80718	0.710625				2.26212	0.916691
		1.09919	0.323298				3.36766	0.612851				3.90406	0.85992
		1.14501	0.514801				1.65266	0.512924				1.28205	0.881546
		3.51296	0.901534				1.35625	0.95633				7.52252	0.949673
		2.10431	0.738215				3.8388	0.915242				1.56061	0.87536
		2.93685	0.834633				2.09904	0.971268				2.21583	0.658614
		2.13418	0.860565				5.05642	0.79987				5.33432	0.897981
		2.3083	0.864086				2.51999	0.964885				6.23873	0.909158
		1.6751	0.496855				4.87337	0.947574				4.67484	0.983113
		1.57623	0.723079				7.28213	0.924036				6.56169	0.886859
		3.34073	0.913443				2.61895	0.948612				11.0891	0.965386
		2.12931	0.907113				2.86415	0.91711				1.92678	0.928965
		4.27461	0.944357				1.38407	0.864172				2.82854	0.918001
		1.86472	0.718951				1.9853	0.870402				2.32732	0.980098
		1.27512	0.930668				2.99251	0.926299				4.44782	0.888193
		1.24948	0.663665				1.5755	0.774118				7.11166	0.968436
		2.29845	0.809593				1.25065	0.343519				1.71254	0.643618
		1.1826	0.414303				2.29747	0.771825				3.74013	0.9242
		2.81193	0.938867				1.49549	0.371704				8.06486	0.884069
		2.91833	0.934358				2.18342	0.743206				1.88317	0.899911
		1.44874	0.751247				5.39173	0.967769				4.9146	0.887362
		2.31691	0.796029				2.32381	0.769464				3.74386	0.904983
		3.3491	0.943341				1.74949	0.718884				4.66207	0.995948
		1.25293	0.58556				2.98776	0.882954				5.51833	0.982689
		1.25838	0.670767				1.41598	0.467025				3.33105	0.952157
		2.6019	0.764393				1.65511	0.359648				2.37704	0.853537
		1.59622	0.778707				1.08147	0.834733				8.82755	0.975634
		1.51619	0.53074				3.4307	0.356193				2.2338	0.75039
		1.40084	0.557182				1.42933	0.354536				1.90723	0.905949
		1.7043	0.612669				1.88715	0.614981				3.40014	0.951053
		1.24047	0.51442				1.39418	0.667347				2.83282	0.912464
		1.41414	0.458057				2.25386	0.785547				8.16582	0.86573
		3.98788	0.938883				3.02273	0.640681				1.97835	0.675413
		1.19197	0.939162				6.78792	0.912597				6.61731	0.918118
		1.15175	0.153067				2.97566	0.86981				6.09548	0.991091
		1.35519	0.665808				1.36004	0.477442				1.46609	0.957857
		2.40897	0.892067				2.46207	0.760086				2.13848	0.731104
		1.89641	0.822075				2.19187	0.302593				1.46326	0.854233
		3.76152	0.932979				1.87217	0.685736				1.42953	0.67301
		2.35867	0.849728				1.49051	0.748319				3.76555	0.956163
		1.10838	0.219834				7.51028	0.915738				7.64746	0.983334
		1.42829	0.63559				2.29131	0.662212				2.87369	0.879759
		2.35012	0.923918				2.98758	0.928603				1.41303	0.777508
		1.18206	0.716624				4.86139	0.927785				2.17394	0.942439
		1.61845	0.675511				3.46032	0.97551				1.90082	0.886674
		3.04542	0.890666				1.78661	0.953133				13.047	0.947187
		4.95234	0.927918				3.19559	0.789639				1.56178	0.961703
		1.59057	0.714877				12.6457	0.513065				2.51127	0.936445
		1.77059	0.896231				1.53887	0.559036				4.89694	0.965715
		2.9157	0.92001				3.79982	0.955223				2.86218	0.961221
		1.5268	0.356381				2.95834	0.85023				15.2785	0.991989
		1.20644	0.530886				1.62191	0.830943				9.92613	0.956715
		4.90828	0.968644				1.87997	0.720038				8.25099	0.979962
		2.81064	0.830173				2.37178	0.738519				6.82561	0.97455
		3.33492	0.908696				4.39821	0.958566				6.64367	0.495023
		2.52241	0.887824				3.22821	0.773911				4.2207	0.970305
		1.39644	0.683489				2.83647	0.860669				1.53813	0.857558
		3.96907	0.966536				1.71759	0.826308				8.09954	0.990025
		1.32278	0.5821				3.62527	0.8672				13.8663	0.973496
		2.67488	0.868922				6.36602	0.934285				1.86733	0.665834
		1.6403	0.819555				3.33382	0.643495				2.59022	0.952799
		1.26035	0.816572				1.43628	0.730487				2.51989	0.903172
		1.85705	0.633643				4.27625	0.83477				4.61096	0.841789
		1.53076	0.848773				3.5307	0.826463				2.41161	0.569207
		1.08386	0.863148				6.07764	0.853141				3.35643	0.939609
		2.11195	0.879506				4.17332	0.891445				2.92112	0.976017
		1.19398	0.775466				5.11941	0.869879				3.93527	0.665499
		1.46657	0.771111				2.73607	0.658516				5.37736	0.62666
		2.59048	0.91677				2.84917	0.777926				3.30657	0.970711
		2.89444	0.929802				3.35773	0.856693				1.47447	0.754371
		1.37219	0.629191				3.62112	0.898516				4.98021	0.742802
		2.25362	0.871068				5.79875	0.90853				1.58509	0.88811
		1.32393	0.727133				3.76699	0.977875				1.27915	0.612919
		1.41523	0.811692				4.19859	0.976737				1.67969	0.873287
		1.23316	0.473317				3.06306	0.822021				5.35236	0.980646
		1.58995	0.395397				2.86989	0.835386				2.28484	0.85038
		4.38488	0.934554				3.72346	0.948151				2.08695	0.882795
		1.37272	0.671503				3.11721	0.618618				1.51365	0.865964
		3.81749	0.919889				12.3102	0.954897				1.89737	0.957296
		1.10969	0.44056				4.38697	0.900498				2.52343	0.942452
		1.24878	0.504965				4.69803	0.944836				3.02611	0.686312
		1.99121	0.741221				1.52692	0.823318				4.96952	0.950186
		1.21429	0.621007				7.20812	0.953524				6.31189	0.980558
		1.71476	0.838824				6.06978	0.935483				4.18076	0.962259
		2.48356	0.858833				4.5468	0.951373				3.84509	0.941526
		1.44611	0.725881				3.97477	0.932772				8.32697	0.692907
		1.15357	0.572402				2.93102	0.864057				1.36661	0.648676
		3.56249	0.939973				4.11856	0.919917				2.27897	0.926372
		1.6059	0.768499				5.71822	0.97212				8.56757	0.959938
		2.12372	0.840429				4.25103	0.706526				1.30749	0.674321
		1.50085	0.716936				2.88141	0.862511				1.58999	0.695442
		3.71632	0.948305				1.51446	0.913046				2.22104	0.933058
		1.45353	0.614523				5.99933	0.810303				7.25865	0.994357
		2.01913	0.740997				3.0602	0.916226				2.60105	0.949183
		3.239	0.904952				6.50176	0.899148				2.41135	0.851916
		2.49807	0.780287				3.5593	0.963629				8.366	0.973013
		1.86427	0.836654				8.32654	0.966011				1.24348	0.837527
		1.34618	0.404878				5.25174	0.888783				1.68721	0.651422
		1.29212	0.893933				1.83152	0.616173				4.64396	0.983074
		1.42163	0.64537				5.29206	0.809903				4.65724	0.988763
		1.66581	0.504918				3.31319	0.877806				3.11895	0.639198
		2.11965	0.907649				3.77939	0.94047
		2.25472	0.757947				4.01357	0.950581
		1.49249	0.77148				3.79928	0.934749
		2.84662	0.82218				2.70345	0.819245
		2.86228	0.897601				7.14493	0.970017
		1.21839	0.473672				1.5057	0.63223
		1.29341	0.927811				5.80523	0.96499
		1.44224	0.666478				5.01878	0.758177
		1.1145	0.503381				3.92339	0.907612
		1.34146	0.783946				1.1737	0.876934
		1.34165	0.792074				5.42464	0.960118
		1.99586	0.841445				3.38799	0.929438
		2.25656	0.880638				4.34855	0.657431
		1.15244	0.272618				7.42072	0.936146
		1.94606	0.640859				1.45302	0.854387
		1.49712	0.731628				5.37454	0.9429
		1.08444	0.366731				5.10405	0.919227
		2.45578	0.887849				4.97763	0.913782
		4.6444	0.96413				6.48564	0.887036
		1.64859	0.918002				5.35568	0.9533
		2.86273	0.867506				3.2287	0.530363
		1.29928	0.616843				2.43915	0.566601
		1.39311	0.585994				5.99509	0.951193
		3.12308	0.728678				8.22581	0.962607
		1.58386	0.977068				6.30315	0.908427
		1.52069	0.637803				2.94324	0.180123
		1.39069	0.659265				2.55986	0.762322
		1.15996	0.552807				5.82434	0.846087
		1.8317	0.678857				1.98312	0.566426
		2.56562	0.926239				6.21688	0.955804
		1.66186	0.93826				5.50103	0.902743
		3.44995	0.92876				4.90778	0.92952
		2.76555	0.954814				9.98826	0.954318
		1.05559	0.87154				6.72239	0.753231
		1.38951	0.831122				1.49436	0.76076
		5.88619	0.967056				2.65785	0.820862
		1.43962	0.642103				1.44531	0.644933
		1.48843	0.605052				3.98809	0.933436
		1.30276	0.887522				3.20904	0.870188
		2.23818	0.887316				4.39531	0.659891
		1.29411	0.533237				10.4074	0.863468
		2.47872	0.953427				3.78085	0.805244
		3.5033	0.897462				1.49677	0.889565
		3.65563	0.964933				3.39924	0.905936
		1.74539	0.762183				1.61205	0.79502
		2.43827	0.85485				1.61069	0.484374
		1.74465	0.681769				2.48244	0.850038
		2.09836	0.710775				7.15405	0.80381
		2.0718	0.849475				1.31617	0.674983
		1.408	0.871192				4.00125	0.912693
		1.93764	0.643671				1.47132	0.96429
		2.6471	0.900147				1.56197	0.733906
		1.36656	0.494071				1.09692	0.282395
		2.66597	0.949836				4.05655	0.846087
		2.01867	0.762139				3.44719	0.720398
		2.53714	0.89894				7.84137	0.972272
		2.05348	0.903199				7.928	0.951303
		2.38421	0.871513				2.16776	0.891762
		1.44508	0.877428				5.61144	0.946234
		4.53494	0.951644				5.5629	0.93603
		3.68891	0.851009				6.74217	0.921948
		1.8623	0.828309				2.01384	0.715948
		1.42352	0.733736				7.06216	0.849639
		2.10699	0.849371				5.21452	0.935241
		2.45958	0.844824				3.22479	0.962926
		4.80045	0.889145				3.24788	0.902271
		7.4111	0.836307				6.06086	0.809968
		6.72746	0.970296				1.83462	0.804596
		5.6933	0.955837				3.05375	0.969817
		1.18689	0.611858				4.83511	0.981911
		2.27717	0.707303				5.33449	0.971654
		1.34931	0.756552				3.26789	0.801009
		4.53094	0.952622				3.72137	0.876908
		6.55225	0.824416				6.64025	0.722199
		5.18277	0.943671				2.5354	0.914049
		4.67681	0.974777				2.25434	0.641221
		3.98937	0.904555				2.46003	0.56484
		3.94766	0.952312				2.35957	0.910599
		5.64887	0.556565				7.17061	0.80219
		5.18351	0.957255				1.72385	0.949754
		5.7528	0.934842				11.9025	0.865045
		5.49107	0.979886				5.48556	0.746617
		2.52097	0.914706				1.45316	0.954896
		4.41966	0.883986				2.9925	0.937968
		2.69346	0.936274				2.95471	0.72121
		4.39455	0.968165				7.01365	0.957978
		4.07516	0.924527				6.68462	0.976581
		6.02887	0.957807				10.1618	0.984825
		5.95274	0.861183				1.97113	0.627898
		7.11115	0.97489				9.44789	0.962582
		3.49243	0.913502				4.50346	0.926246
		4.30412	0.92432				6.81594	0.965918
		2.17001	0.896733				7.93034	0.903957
		5.36956	0.973725				2.42046	0.8348
		3.45256	0.875436				4.03534	0.958601
		3.99262	0.95967				4.45363	0.732551
		3.03727	0.772391				4.67052	0.953154
		3.01134	0.929917				4.63962	0.911598
		3.37079	0.910205				5.94619	0.815228
		2.10545	0.778133				3.23827	0.942635
		1.3738	0.178965				2.6728	0.784811
		2.4242	0.867223				8.67764	0.98547
		2.02202	0.894075				8.39816	0.867753
		6.88605	0.964966				9.00413	0.937859
		6.60747	0.955339				6.43545	0.971457
		4.42191	0.913553				6.07505	0.830387
		1.34354	0.77895				3.93566	0.964495
		1.82514	0.895399				3.10415	0.930121
		1.49166	0.557051				2.15495	0.862265
		5.37015	0.943641				1.4792	0.703698
		4.98985	0.950311				1.9625	0.681875
		3.50959	0.901724				2.77032	0.929212
		4.87177	0.932666				6.95281	0.911985
		1.47353	0.557432				7.15793	0.960678
		5.61023	0.815166				3.00935	0.963454
		1.86948	0.594948				1.73441	0.805358
		7.35827	0.929303				6.23449	0.714437
		4.2284	0.969054				1.7703	0.660261
		4.95562	0.955555				4.72399	0.915024
		5.1286	0.976401				9.13491	0.918553
		6.12614	0.978829				4.79969	0.900871
		3.6853	0.954561				2.91917	0.928431
		5.22851	0.894431				4.75167	0.900801
		3.05453	0.932229				7.2963	0.884087
		3.45579	0.527384				2.7624	0.946726
		2.05061	0.974281				8.8875	0.927148
		2.99834	0.90832				2.45179	0.812141
		2.07996	0.863255				2.10699	0.849371
		8.53184	0.886068				2.45958	0.844824
		1.73019	0.796299				4.80045	0.889145
		2.79614	0.534976				7.4111	0.836307
		3.8748	0.868739				6.72746	0.970296
		2.40458	0.879243				5.6933	0.955837
		2.34365	0.80288				1.18689	0.611858
		4.74754	0.969825				2.27717	0.707303
		2.26906	0.88505				1.34931	0.756552
		7.59175	0.919571				4.53094	0.952622
		2.95447	0.871979				6.55225	0.824416
		1.53791	0.79927				5.18277	0.943671
		1.94246	0.871497				4.67681	0.974777
		2.34088	0.969663				3.98937	0.904555
		7.73748	0.977005				3.94766	0.952312
		2.39249	0.872252				5.64887	0.556565
		3.95822	0.966587				5.18351	0.957255
		1.46654	0.883501				5.7528	0.934842
		4.03545	0.953728				5.49107	0.979886
		2.39432	0.607727				2.52097	0.914706
		1.40209	0.954654				4.41966	0.883986
		3.43572	0.742565				2.69346	0.936274
		2.96019	0.91733				4.39455	0.968165
		3.97402	0.945331				4.07516	0.924527
		5.06536	0.942477				6.02887	0.957807
		4.56686	0.951364				5.95274	0.861183
		3.2307	0.858535				7.11115	0.97489
		4.32169	0.979083				3.49243	0.913502
		3.48544	0.933603				4.30412	0.92432
		2.4608	0.590649				2.17001	0.896733
		7.20026	0.961647				5.36956	0.973725
		1.86437	0.870271				3.45256	0.875436
		2.85442	0.882425				3.99262	0.95967
		4.91378	0.94507				3.03727	0.772391
		1.96544	0.863731				3.01134	0.929917
		6.59299	0.962313				3.37079	0.910205
		3.84337	0.892331				2.10545	0.778133
		1.32628	0.699478				1.3738	0.178965
		5.30728	0.969799				2.4242	0.867223
		1.4726	0.661431				2.02202	0.894075
		2.78465	0.94088				6.88605	0.964966
		2.17634	0.898481				6.60747	0.955339
		3.62286	0.991055				4.42191	0.913553
		2.06268	0.882849				1.34354	0.77895
		1.92455	0.82358				1.82514	0.895399
		1.66448	0.740756				1.49166	0.557051
		5.86572	0.935633				5.37015	0.943641
		1.3589	0.697359				4.98985	0.950311
		2.57894	0.965446				3.50959	0.901724
		2.52323	0.880426				4.87177	0.932666
		2.485	0.97289				1.47353	0.557432
		4.24245	0.946619				5.61023	0.815166
		1.69056	0.750814				1.86948	0.594948
		1.18535	0.599207				7.35827	0.929303
		4.38352	0.83953				4.2284	0.969054
		5.62483	0.951535				4.95562	0.955555
		2.12565	0.920999				5.1286	0.976401
							6.12614	0.978829
							3.6853	0.954561
							5.22851	0.894431
							3.05453	0.932229
							3.45579	0.527384
							2.05061	0.974281
							2.99834	0.90832
							2.07996	0.863255
							8.53184	0.886068
							1.73019	0.796299
							2.79614	0.534976
							3.8748	0.868739
							2.40458	0.879243
							2.34365	0.80288
							4.74754	0.969825
							2.26906	0.88505
							7.59175	0.919571
							2.95447	0.871979
							1.53791	0.79927
							1.94246	0.871497
							2.34088	0.969663
							7.73748	0.977005
							2.39249	0.872252
							3.95822	0.966587
							1.46654	0.883501
							4.03545	0.953728
							2.39432	0.607727
							1.40209	0.954654
							3.43572	0.742565
							2.96019	0.91733
							3.97402	0.945331
							5.06536	0.942477
							4.56686	0.951364
							3.2307	0.858535
							4.32169	0.979083
							3.48544	0.933603
							2.4608	0.590649
							7.20026	0.961647
							1.86437	0.870271
							2.85442	0.882425
							4.91378	0.94507
							1.96544	0.863731
							6.59299	0.962313
							3.84337	0.892331
							1.32628	0.699478
							5.30728	0.969799
							1.4726	0.661431
							2.78465	0.94088
							2.17634	0.898481
							3.62286	0.991055
							2.06268	0.882849
							1.92455	0.82358
							1.66448	0.740756
							5.86572	0.935633
							1.3589	0.697359
							2.57894	0.965446
							2.52323	0.880426
							2.485	0.97289
							4.24245	0.946619
							1.69056	0.750814
							1.18535	0.599207
							4.38352	0.83953
							5.62483	0.951535
							2.12565	0.920999

## Sheet: Fig. 5E
DDX6+ granules
1 DPE	3 DPE	7 DPE
0	3	6
1	2	12
0	6	53		*Values represent individual cells
3	1	9
0	6	45
3	5	25
2	4	35
0	7	48
5	2	10
4	7	4
3	7	19
0	5	23
2	4	30
1	4	23
3	3	31
4	4	25
3	5	20
4	4	9
3	4	33
2	8	24
3	2	39
1	2	23
3	0	30
2	3	8
3	4	18
0	2	28
0	18	6
2	6	23
2	11	24
4	8	16
2	2	8
1	0	7
4	2	17
2	6	22
2	2	24
5	1	27
0	5	22
3	3	28
4	10	26
3	5	44
3	5	14
1	2	21
2	5	1
0	11	34
3	1	24
2	12	21
1	3	21
4	1	37
4	5	33
3	2	37
0	6	7
0	3	8
6	6	47
2	12	16
2	5	42
0	2	11
1	0	8
2	0	25
2	3	21
0	3	19
1	5	35
2	0	25
3	1	11
2	0	26
3	6	0
0	5	19
1	10	18
3	10	33
1	1	50
0	4	17
1	7	32
2	7	41
0	7	29
5	10	56
2	1	29
1	13	16
2	4	18
2	5	9
2	5	10
3	8	41
5	7	8
4	1	6
1	0	24
1	4	8
0	1	23
2	2	5
1	5	24
0	3	19
3	9	20
1	6	35
0	3	25
3	3	11
2	6	22
2	6	8
7	3	4
1	7	28
2	9	11
0	7	37
3	3	36
3	2	31
0	3	16
0	2	19
3	6	27
0	3	7
1	9	16
2	5	2
1	2	4
4	6	25
1	3	9
1	5	25
2	4	16
1	4	20
2	4	31
0	4	18
1	4	3
0	1	20
2	1	11
2	3	23
0	1	11
2	5	35
3	7	6
7	7	15
3	6	21
	3	12
0	1	29
1	1	15
2	3	24
2	6	5
2	0	35
0	1	5
3	2	18
8	1	15
1	7	31
3	2	8
5	4	7
0	4	17
0	2	32
2	6	10
4	4	16
5	7	5
3	1	32
2	1	20
7	7	37
2	11	25
2	2	9
1	6	18
0	9	11
2	1	59
0	5	14
3	4	38
2	6	10
1	0	45
2	3	17
2	1	25
8	1	8
0	0	13
3	1	34
1	2	11
3	5	22
4	0	12
3	2	26
2	17	32
0	3	16
2	5	12
1	2	5
6	5	11
2	3	16
2	8	60
0	1	0
2	4	27
1	8	12
3	2	13
5	5	7
2	0	46
3	3	17
0	5	17
2	6	5
1	5	10
6	2	26
7	1	29
3	1	14
0	2	19
3	0	28
2	5	17
2	0	47
5	5	5
4	4	29
3	3	2
1	7	24
4	12	2
0	1	53
0	0	24
3	3	23
3	9	6
1	5	31
3	4	23
2	11	13
1	6	43
3	4	21
3	6	4
2	3	42
0	4	21
4	3	14
3	0	4
3	7	10
5	4	21
3	8	14
0	7	44
5	5	5
0	0	8
2	1	52
4	3	1
2	4	6
0	1	11
6	0	15
1	5	32
1	1	9
3	3	46
2	2	29
0	8	1
1	4	10
2	3	37
4	9	1
2	13	44
6	5	15
5	6	13
3	7	4
4	4	9
3	4	28
1	4	10
2	7	16
1	2	2
0	6	23
1	3	3
3	2	14
2	2	29
4	1	0
1	7	21
4	7	11
0	2	8
2	5	45
1	2	23
4	0	15
1	9	5
1	2	27
1	3	41
1	2	15
2	7	63
5	2	51
4	7	24
1	11	26
0	12	19
4	3	1
1	2	15
5	1	17
1	6	38
7	5	1
3	4	11
5	1	11
0	1	6
1	5	11
1	2	17
3	1	21
2	4	4
0	3	19
5	0	14
0	7	38
6	7	15
1	6	17
0	5	11
2	4	10
4	3	11
1	4	11
0	1	10
2	10	20
0	3	7
4	4	14
0	3	29
4	1	14
2	3	23
3	3	33
0	3	15
2	7	2
5	1	21
0	5	25
2	4	41
3	7	13
3	5	9
0	2	13
3	1	25
2	0	3
1	1	6
0	1	26
3	2	12
1	2	34
4	3	26
0	2	10
2	8	3
5	6	10
3	7	31
5	3	16
1	2	19
3	2	8
2	7	15
0	5	28
1	5	3
2	0	19
4	3	7
6	8	24
1	3	30
4	1	21
4	4	5
3	7	17
4	5	5
3	1	28
5	8	31
1	0	41
3	10	19
6	2	62
1	3	36
5	4	8
0	2	53
0	9	12
1	4	10
0	8	31
1	4	21
0	3	7
1	3	10
2	5	13
5	2	14
3	1	17
0	4	28
4	7	6
3	4	16
1	4	9
3	11	13
2	9	7
1	6	32
4	4	2
2	4	31
2	0	6
5	4	46
2	3	26
4	10	45
4	1	11
5	3	21
2	1	16
0	1	8
1	6	25
2	5	63
6	2	12
1	3	33
3	5	19
4	3	10
1	0	11
0	3	11
0	4	38
4	18	66
4	1	54
0	2	62
3	6	21
3	11	22
3	2	58
2	3	10
4	4	17
2	8	13
1	6	17
4	1	37
2	4	8
4		23
8		48
1		47
2		55
8		15
3		16
2		8
4		28
4		36
2		26
1		28
6		26
1		26
2		45
4		24
3		28
4		22
2		23
1		36
3		17
4		7
1		13
3		31
3		21
6		7
2		14
4	6	13
2	2	21
4	1	12
1	7	18
0	2	11
1	8	4
1	2	17
1	6	38
1	3	38
3	6	7
2	1	3
0	3	25
0	0	27
3	1	15
2	2	25
1	4	46
3	0	3
0	3	11
0	0	24
0	2	48
0	7	34
1	4	25
1	3	10
0	12	9
2	4	20
1	4	8
0	6	31
7	2	25
0	1	22
1	6	16
0	5	53
1	3	8
2	3	5
0	4	18
0	3	18
1	0	14
4	2	8
3	3	11
2	4	13
3	3	14
0	0	14
0	7	0
1	3	10
3	3	47
1	0	50
0	4	16
0	3	11
0	0	39
3	4	21
3	0	9
3	3	5
4	6	12
2	4	15
2	1	5
0	0	3
0	0	14
0	2	6
0	1	22
3	2	13
0	1	10
2	0	15
1	1	15
2	2	7
0	3	8
6	5	9
3	1	24
0	5	36
0	7	4
3	2	31
0	6	37
0	7	44
0	0	36
0	0	11
0	0	35
3	1	17
2	11	19
8	0	19
5	4	13
0	6	24
0	5	4
2	8	28
3	5	7
5	2	27
1	6	24
2	5	19
0	0	0
3	3	12
0	2	24
4	2	34
5	1	8
1	7	4
2	1	7
0	3	3
	2	7
0	4	5
0	5	7
0	5	12
4	0	25
1	2	27
3	0	41
3	2	13
1	2	16
0	2	35
0	2	21
1	6	18
2	4	16
1	1	34
0	1	22
2	9	18
1	1	11
2	3	8
1	3	9
1	2	8
4	1	13
0	5	8
3	2	34
4	4	58
1	2	17
0	3	42
1	1	8
2	6	20
1	0	27
0	7	17
0	2	0
1	2	35
0	3	15
0	2	35
0	3	50
0	1	43
0	4	22
1	2	4
0	1	16
4	9	13
0	8	20
1	0	16
2	4	19
2	2	25
0	1	11
0	7	18
0	3	8
1	0	8
1	1	15
1	2	8
3	7	68
3	14	36
0	0	28
0	7	41
4	2	18
0	4	31
2	2	54
1	3	8
2	8	23
1	5	9
3	0	19
0	12	40
1	2	12
3	10	27
1	4	15
1	6	26
0	8	31
0	0	12
1	0	15
0	5	29
3	1	6
2	9	16
2	4	19
5	0	11
3	2	6
2	6	15
0	0	6
0	2	33
0	2	16
0	10	7
0	2	5
3	4	4
0	0	17
0	1	6
5	2	22
3	0	12
1	0	9
1	4	60
0	1	4
2	5	49
1	4	12
1	2	5
0	7	7
0	5	27
0	4	33
0	5	12
4	7	11
0	4	12
1	6	7
0	3	18
1	1	7
1	7	44
0	0	20
0	5	14
0	6	12
0	4	23
0	6	14
0	3	8
0	5	2
0	8	34
0	1	22
0	2	32
0	0	4
0	3	20
0	2	8
1	1	16
0	7	10
0	1	6
0	1	13
0	3	17
2	4	7
0	5	18
1	2	17
0	0	34
3	0	10
3	0	8
1	1	33
0	1	13
1	0	46
1	0	5
2	0	24
0	0	8
0	0	52
2	0	19
3	3	18
0	2	19
0	0	28
2	1	32
0	0	8
0	1	56
0	0	9
0	3	8
1	1	6
0	4	34
0	1	24
0	2	45
0	0	21
2	4	41
0	3	34
1	1	10
1	1	13
	2	44
	2	6
	1	2
	1	6
	0	38
	1	4
	6	50
	1	13
	6	29
	3	36
	2	53
	5	8
	2	13
	3	37
	1	7
	1	5
	0	38
	2	7
	4	4
	1	35
	0	12
	5	51
	0	20
	4	11
	9	27
	1	36
	1	35
	2	19
	1	41
	4	6
	1	15
	4	11
	5	34
	0	26
	3	41
	0	24
	7	17
	3
	2
	3
	1
	0
	2
	2
	2
	0
	5
	5
	2
	5
	1
	1
	7
	4
	1
	2
	7
	5
	2
	0
	1
	0
	1
	0
	3
	5
	0
	4
	6
	3
	2
	1
	5
	3
	1
	0
	5
	0
	1
	4
	0
	4
	2
	4
	4
	0
	0
	2
	3
	2
	5
	4
	8
	4
	0
	4
	4
	0
	1
	2
	2
	1
	2
	5
	4
	1
	1
	3
	2
	1
	1
	7
	0
	8
	4
	4
	4
	5
	4
	0
	1
	0
	11
	3
	3
	0
	0
	0
	5
	1
	0

## Sheet: Fig. 5F
	DDX6+ granules
Max/min feret diameter ratio (bin upper limit)	2	3	4	5	6	7	8	9	>9
	6	12	23	30	25	48	53	24	44
	9	4	23	23	35	33	45	22	34
	10	9	30	20	25	22	31	24	26
	19	8	11	18	39	26	28	24	17
	17	6	18	23	21	37	24	47	41		*Values represent individual cells
	14	16	24	21	33	25	28	42	56
	1	8	16	18	16	19	21	19	41
	8	7	16	50	24	35	37	33	23
	8	27	11	32	20	25	21	29	35
	0	7	23	22	25	29	37	28	31
	9	11	12	19	18	6	25	20	11
	10	16	29	38	21	19	35	46	59
	8	11	15	45	34	25	20	24	32
	8	11	15	8	43	36	47	31	53
	5	2	14	26	21	31	29	42	44
	8	9	17	60	21	27	21	52	46
	4	3	22	13	37	16	11	21	29
	7	35	11	26	23	20	28	24	63
	4	18	16	28	24	31	41	36	51
	6	8	17	44	6	17	21	21	38
	15	7	17	23	19	32	33	19	38
	24	32	19	15	15	37	41	26	30
	5	18	23	27	25	25	19	24	63
	5	11	13	19	17	25	19	46	54
	10	16	8	17	53	29	62	48	45
	16	0	15	17	31	32	28	12	31
	5	27	15	11	46	45	25	34	38
	9	12	13	10	66	11	11	58	38
	11	10	14	34	62	29	25	33	36
	10	14	29	31	48	45	25	56	35
	13	17	15	41	26	38	25		24
	12	2	1	32	28	47	5		41
	12	2	15	33	11	55	37		35
	5	24	11	21	25	21	44		60
	7	23	14	58	50	27	27		33
	5	14	21	37	22	10	16		44
	5	10	26	17	17	53	15		52
	6	1	15	18	13	47	41		28
	4	6	28	24	19	36	27		45
	4	9	10	31	25	24	15		34
	14	1	10	11	27	22	29		44
	5	10	17	39	35	42	24		38
	1	4	11	28	17	27	21		29
	9	3	16	24	35	20	41		37
	10	11	12	18	50	33			38
	16	8	22	34	43	10			51
	2	5	17	34	36	50			34
	0	17	23	20	28	35			41
	26	1	28	22	31
	15	11	36	19	54
	11	4	26	25	8
	14	11	22	68	19
	20	10	23	40	12
	7	2	34	26	16
	14	9	16	31	20
	23	13	18	7	18
	25	3	16	23	34
	13	6	15	34	24
	12	26	14	22	19
	10	21	13	32	32
	3	5	9	17	36
	10	28	31	46	20
	16	31	19	8	35
	8	8	19	34	19
	3	12	12	6	26
	19	7	13	53	17
	7	9	9	27
	5	13	17	11
	31	7	20	24
	21	10	11
	13	11	18
	14	11	15
	6	10	18
	16	13	12
	2	17	19
	6	8	12
	26	8	27
	8	28	12
	15	13	18
	16	14	7
	36	21	18
	7	12	13
	7	17	13
	13	7	7
	4	8	4
	3	22	12
	15	14	36
	3	8	41
	9	14	15
	20	0
	8	10
	18	21
	11	9
	13	10
	14	24
	5	4
	12	7
	5	7
	3	21
	6	18
	15	8
	15	8
	7	4
	8	16
	11	8
	4	23
	0	9
	8	15
	4	6
	3	17
	7	6
	5	12
	7	5
	16	7
	11	12
	13	11
	8	7
	8	12
	0	14
	16	8
	13	4
	8	8
	8	16
	6	13
	16	19
	11	8
	15	9
	6	8
	7	6
	5	2
	4	4
	22	7
	9	5
	4	11
	49	6
	14
	2
	10
	6
	13
	17
	10
	8
	5
	6
	8
	13
