# Supplementary material for: The mini-IDLE 3D biomimetic culture assay enables interrogation of mechanisms governing muscle stem cell quiescence and niche repopulation
Source: eLife. 2022 Dec 20;11:e81738. doi: 10.7554/eLife.81738 (PMC9904761; doi:10.7554/eLife.81738)
Supplement: Figure 6—source data 1. — Data for subpanels separated into tabs. [file elife-81738-fig6-data1.xlsx]

## Sheet: Fig. 6C
7 DPE
53.7931
46.3158
46.9697
57.1429
62.9508
44.1176
40.5654
45.6519

## Sheet: Fig. 6D
7 DPE
5
4.28571
4.61538
5
1.66667
8.13008
7.93651
7.5
