# Supplementary material for: The mini-IDLE 3D biomimetic culture assay enables interrogation of mechanisms governing muscle stem cell quiescence and niche repopulation
Source: eLife. 2022 Dec 20;11:e81738. doi: 10.7554/eLife.81738 (PMC9904761; doi:10.7554/eLife.81738)
Supplement: Figure 7—figure supplement 1—source data 1. — Data for subpanels separated into tabs. [file elife-81738-fig7-figsupp1-data1.xlsx]

## Sheet: Fig7. S1A
Young	Day 1	Day 3	Young+wort	Day 1	Day 3	Aged	Day 1	Day 3	Aged+wort	Day 1	Day 3
	6.56435	39.338		13.6037	2.31139		10.4475	77.3225		16.0295	49.3713
	8.41346	37.2115		10.375	0.924556		10.9098	66.2278		7.03521	29.216
	10.6324	54.9926		9.60276	0.462278		1.20192	71.3129		11.4053	30.6953
	15.2552	83.3025		14.0533	13.4985		11.0947	106.047		10.4475	26.8121
	17.1043	58.3395		19.3232	20.2478		11.6494	73.9645		10.8173	20.9874
	13.0362	75.9689		9.8003	15.4401		15.625	84.7818		13.8683	19.6006
*values represent technical replicates from all biological replicates

## Sheet: Fig7. S1B
Young	Young+wort	Aged	Aged+wort
1.01947	0.966049	0.934793	0.746619		*Values represent individual cells
1.15773	1.01172	1.15828	0.737403
1.14716	1.15625	0.784724	1.31382
1.0188	0.341617	1.0572	1.03693
0.97086	0.517402	0.971318	0.972398
1.08653	0.364994	1.36322	1.32024
1.02682	0.968702	0.619993	1.04652
0.804242	1.0522	0.916982	1.20229
1.09562	1.05073	0.60482	0.990581
0.987376	1.06175	1.24759	1.10548
0.982029	1.12777	0.887368	0.661749
0.945493	0.470794	0.730049	0.942726
1.21594	0.905546	0.788164	0.551142
1.27598	0.954462	0.894818	1.11233
0.985413	1.00076	0.747745	0.82164
1.43877	0.353652	1.03511	0.928263
1.08973	0.459118	1.07279	0.766654
0.988957	0.65895	0.637861	0.967841
0.677278	1.03658	0.912126	1.21224
1.11431	1.22032	0.774275	1.45028
1.07387	0.379878	1.33196	1.00312
1.10035	1.01701	1.08078	0.855302
1.0802	0.70428	0.915077	0.943078
0.998822	0.477568	0.741527	1.07259
0.905707	0.765322	1.18294	0.935949
0.934379	0.353948	0.872268	0.969783
1.00293	0.962873	0.784706	1.04824
1.08445	1.00884	0.869296	0.99393
0.944003	0.950832	1.02161	0.951603
0.895378	0.999517	1.23344	0.736623
0.880164	1.04713	0.934854	1.00088
1.1614	0.718424	1.01824	1.30951
1.18197	1.1398	0.406052	1.04811
1.44063	0.427889	0.945788	0.919569
1.11105	0.926319	0.856886	0.967402
0.993217	0.898064	0.872385	0.922381
1.276	0.370513	1.07983	0.967096
0.94029	0.909864	0.722064	0.797967
0.979121	0.505431	0.859553	0.790632
0.983779	0.96747	0.744443	1.01892
0.776451	1.0562	0.932664	0.965016
0.958311	1.07032	0.942659	0.954753
1.02224	0.925102	1.01517	0.927621
1.09644	1.06377	1.22809	1.09609
1.33431	1.20343	0.89922	0.865746
1.0261	1.30008	1.21858	0.927414
1.14628	0.697503	0.808673	0.94261
0.971788	0.705255	0.901974	0.808824
0.972895	1.19261	1.15975	0.893868
0.876872	1.09455	1.01042	1.03287
1.16295	1.44457	0.945307	0.776406
0.887571	0.680158	0.76308	0.874345
1.32185	1.71156	0.950914	0.975794
0.7051	1.02985	1.31993	0.979611
1.06856	0.915721	0.993623	1.00016
0.946568	1.27419	1.1429	0.992658
1.20762	1.19378	0.99769	0.914436
0.954645	1.52719	0.821274	0.991234
0.834795	0.77052	0.773426	0.975311
0.790345	0.780667	0.876306	1.11593
1.31517	0.758553	1.13221	0.936476
0.926515	0.737433	0.878271	0.924706
1.14077	0.488908	0.711744	0.938954
1.00208	0.566295	0.957095	0.976586
0.970184	1.28613	0.764765	0.951805
1.14528	0.480216	0.950103	1.14253
0.997455	0.96879	1.39148	1.11434
0.921978	0.785879	0.956384	0.96639
1.02263	1.2101	0.894635	1.0485
1.13902	0.898461	0.977638	1.05668
1.26844	2.243	1.12254	0.959902
1.15239	0.774487	1.00494	1.03599
1.04353	1.09862	0.758661	0.970622
1.17929	1.25069	0.892074	0.810004
1.18308	1.15015	1.37934	0.90268
1.01432	1.06199	1.25795	0.904586
0.941021	1.16869	0.971999	1.00092
0.957821	1.65838	1.05203	1.01881
0.982311	1.14711	1.03942	0.948434
1.12398	0.5952	1.01494	0.947651
1.36582	1.73422	0.741004	0.52781
0.952855	1.13496	0.963892	0.838133
1.22868	0.922485	0.879548	0.89268
1.18706	1.53336	0.991007	0.979178
1.28635	0.812377	0.957461	0.833916
0.901469	1.08429	0.771134	1.01162
0.903177	1.11316	0.452291	1.18377
0.489552	1.17884	0.784983	0.863421
0.807647	0.540359	0.867028	1.20586
0.921683	1.25991	1.07069	1.05183
0.953729	0.475056	1.02572	1.01092
1.27468	0.808939	1.10859	1.13433
0.970551	0.829334	1.09445	1.03571
1.02869	0.849427	0.892538	0.928242
0.877466	0.694652	1.35463	0.925669
0.863134	0.565383	1.15066	0.844391
1.01927	1.283	0.903604	0.915624
0.832492	1.12391	0.796701	0.910905
1.15068	1.25882	1.30804	0.996559
1.28999	1.28756	0.915527	1.00994
1.45987	1.11337	1.20261	0.914614
0.975259	1.15814	1.3142	0.938463
1.00164	0.854072	0.863122	1.00696
0.953644	1.10144	0.769879	1.05477
0.934146	1.67721	1.18906	1.00134
1.37106	0.96601	1.30295	0.988155
1.00024	1.2531	0.902549	1.0645
1.09747	1.02118	1.04516	0.988856
1.00654	1.37725	1.10021	0.720888
1.38678	0.458708	0.811997	0.716182
1.49084	0.789302	0.801524	0.949298
1.27952	0.447905	0.723353	0.919255
1.30792	1.13531	0.518574	0.916455
1.14206	1.55158	0.963511	1.05972
1.24866	0.525869	0.869023	0.862595
1.12287	0.443421	1.0677	1.01394
0.940575	1.06685	0.806981	1.38859
1.23316	0.995856	0.729803	1.11453
0.911447	1.18788	0.837856	1.02258
0.996027	1.18688	0.899531	1.03971
0.70979	1.16935	0.950625	0.892928
1.03429	1.33023	1.11372	0.886757
1.31287	1.46611	1.04074	0.956707
1.3277	1.35658	0.937268	1.08177
0.720556	1.30137	1.18863	0.868825
0.603807	1.06984	0.995666	0.892111
0.981517	1.07102	0.884925	0.977291
1.02912	0.49969	0.912861	1.02677
1.0486	1.34599	0.796744	1.02247
1.01033	0.953755	0.944875	0.925926
1.14186	0.503061	0.858875	0.914249
0.850795	0.451339	0.859171	0.94379
1.09247	0.431121	0.80789	0.968556
0.983569	1.2497	0.793444	0.901896
0.994331	1.63685	0.950682	0.833181
0.911069	1.21187	0.823222	0.943176
1.10942	1.07099	0.653739	0.875939
1.08475	1.67432	1.00522	1.00532
1.13067	1.14573	0.976846	0.971385
1.00962	0.966044	0.916738	0.782501
1.17547	0.963483	0.943459	0.919349
1.09053	1.18019	0.909624	1.0299
1.0853	2.21148	0.919946	0.872483
1.05176	0.525757	1.02705	0.84324
0.741066	1.09171	0.7806	1.00557
0.770983	1.01641	0.942513	0.911581
0.49026	1.73421	0.795122	0.942948
1.04055	1.21511	0.856402	0.887551
1.02149	0.578107	0.787503	1.00807
0.943783	0.488272	0.847847	1.08605
0.932503	1.03246	0.912433	1.00451
0.852802	0.940434	0.851654	1.12069
1.38953	0.943589	0.810131	0.875353
1.18698	1.02448	0.968576	0.936745
1.11133	0.803557	1.05635	0.819581
1.39111	0.922426	0.931493	0.743609
1.18367	1.47126	0.795261	0.845921
1.33425	0.874299	0.911024	0.954288
0.954994	1.49286	0.882637	0.910655
0.768656	1.24006	0.97341	1.10064
0.979769	0.450577	0.729891	0.973021
0.742254	0.703806	0.89573	0.97416
0.794325	1.25949	1.05909	0.922666
0.803517	1.16945	0.931465	0.94651
1.43805	0.49409	1.2237	1.15213
0.560803	0.867687	1.13119	0.768669
1.1725	1.1729	1.26459	1.70509
0.950489	1.27388	0.952357	1.25939
0.884006	1.35988	0.955936	1.3594
0.750057	1.24521	0.759079	1.05667
0.969011	1.11332	0.982333	0.975236
0.575928	0.533022	0.952125	0.948416
0.682288	0.514204	0.807801	0.848807
0.992987	0.896218	0.86011	0.986383
1.17923	1.31809	0.938275	0.868065
0.990849	1.37017	1.03494	0.836404
1.0896	1.02177	1.3441	0.76797
1.16486	1.17664	0.923839	0.865199
0.827992	0.904106	1.00169	0.931795
1.23808	0.729819	1.23231	0.848916
1.07969	1.2705	1.01258	0.951174
1.12037	1.05634	1.03651	0.8936
0.778444	1.28754	0.837012	0.943991
1.17576	0.511332	0.917492	0.939614
1.19849	0.511811	0.840802	1.02144
1.04831	0.954088	0.931169	1.51986
1.22191	0.987298	0.999854	0.904529
1.13033	1.02197	0.99803	0.923235
1.32709	1.02312	0.916131	0.849822
0.900962	1.29019	0.91018	0.854959
1.25264	0.999405	0.790191	0.936463
0.887388	1.05678	0.867565	0.903922
0.87459	1.24466	0.979923	0.974496
1.44709	0.441745	0.829965	1.08771
1.08348	0.519055	0.831951	0.813027
1.21327	0.537937	0.446907	1.00066
1.13497	0.54681	0.481744	0.97787
1.05866	1.2791	0.89146	0.568849
1.09906	1.17626	0.934364	0.938639
1.29699	1.41036	1.01642	0.842371
1.15058	1.04672	0.745138	0.88636
0.568314	1.09269	0.798351	0.910312
0.968906	1.03392	0.70916	0.870333
0.899411	0.818971	0.998076	0.925686
1.00999	1.84726	0.600545	1.03106
1.0521	1.25545	0.894388	0.983599
1.02788	1.23328	1.36421	1.04899
0.970346	1.31157	0.784909	0.930374
0.987101	0.616364	0.935109	0.942424
1.09435	0.574097	1.06504	1.22624
0.910623	1.75692	1.36349	0.806333
0.904891	0.539879	1.22358	0.917134
1.18509	1.19553	0.651301	1.12377
1.19216	1.2008	0.664389	1.24314
1.06049	0.953102	0.761834	1.10809
0.93615	0.921108	0.935798	0.90947
0.970371	1.15658	0.902771	0.860013
1.10408	1.90232	0.722036	1.01656
1.03921	0.522573	0.778951	0.903504
1.23325	0.710855	0.801113	1.05019
1.09841	1.03588	0.814719	0.826641
0.875796	1.1071	0.841596	1.0218
1.09161	0.997103	0.971417	0.89613
1.09562	1.05726	0.778198	0.904239
0.953528	1.07181	0.634019	0.968655
1.08525	1.39828	1.08297	0.987482
0.896647	1.20579	1.09203	1.00857
1.01325	1.11057	0.873895	1.05331
0.778365	1.17152	0.864755	1.04598
0.993166	1.16616	0.963899	0.85361
1.06561	1.13535	0.921797	0.84671
1.23834	1.21661	0.880133	1.04916
1.11603	1.17079	0.953635	0.978284
0.664676	0.986804	0.958397	0.957058
0.969258	1.27767	0.979138	1.01167
1.02206	0.956248	0.988217	1.15436
1.00588	0.979371	0.680134	0.910561
1.09686	0.542795	0.901373	0.982002
1.15557	1.22888	1.06247	1.09365
0.931816	1.10631	0.665602	0.96707
0.87348	1.15223	1.02977	0.983925
0.895136	1.0133	0.818955	1.06832
1.02254	0.99085	1.00011	1.10663
1.25653	1.00035	1.09054	0.871288
0.883385	1.02874	1.26912	1.046
0.90642	0.995121	0.89844	1.01085
1.14118	0.92505	0.944231	1.2175
0.880681	0.971126	0.928684	1.15131
0.906833	0.819007	0.908292	1.03546
1.09688	0.905562	0.864302	0.95078
1.06621	0.90224	0.952981	1.03539
1.11079	0.946994	0.865681	1.04961
0.808231	0.803484	0.92372	1.46303
0.818739	1.14803	0.91755	0.922758
1.0344	1.09448	0.789655	1.04485
1.04464	0.958559	0.894462	1.0041
1.05223	1.23621	0.773882	0.913873
1.08108	1.13416	0.814816	0.98646
1.02976	1.29295	1.00422	0.91502
1.05058	1.03936	0.799486	0.869751
0.996724	1.19944	0.862031	1.0254
0.891409	0.835369	0.867379	0.872689
0.864737	1.04931	1.01253	0.831344
0.90226	1.09831	0.7708	0.583832
1.0765	0.972347	0.961504	0.998567
1.27988	1.10209	0.890147	1.31156
0.917651	1.33194	0.939701	1.16634
0.890833	1.09677	0.742552	0.942528
0.788891	1.21922	0.894489	0.956442
1.15603	1.50322	0.84749	0.964514
1.28207	0.958373	0.946545	0.917713
1.23339	1.01394	1.05118	1.31251
1.34163	0.985826	0.857939	1.07462
1.31486	0.960305	0.763815	1.19067
1.11416	1.10749	0.937141	0.734084
1.14667	1.08634	1.00469	1.19894
1.13343	1.39911	0.766324	1.11808
0.902335	1.23535	0.400541	0.999586
1.19893	1.1063	1.07708	1.12905
0.999743	1.37003	0.769953	1.01844
1.18271	1.00397	0.882358	0.926841
1.03492	0.626629	0.795951	1.07122
1.38305	0.501713	0.82146	1.08281
1.18695	1.26644	1.1054	1.02587
1.1687	0.631936	0.716556	1.02938
1.10466	1.08638	0.82945	0.868843
1.03947	1.07293	0.94882	1.07313
1.04962	1.65225	0.94325	1.09461
1.18025	1.25152	1.09902	1.08597
1.04625	1.52627	1.32674	1.03485
1.46031	0.934837	0.920624	0.340679
1.01464	1.19024	1.0336	1.03981
0.929942	1.28429	0.843315	1.11689
1.4858	1.0075	1.00097	1.19633
1.14709	1.32915	1.06789	1.05638
0.925633	1.08075	0.985517	1.03829
1.13027	1.31191	1.0183	0.884414
1.06591	1.06532	1.08276	1.16465
1.31046	1.27466	1.05078	0.994069
1.02669	1.19065	0.783744	0.992863
1.05711	1.07212	0.832349	1.23638
0.980045	0.866229	0.525399	1.09793
1.04476	0.52989	1.18138	1.08086
0.926322	1.24414	0.853387	1.00819
0.92789	1.20134	0.979039	0.986777
0.988743	1.21578	0.804979	0.885271
0.915633	1.66517	0.857627	1.02908
0.992782	1.79289	0.784504	0.855637
1.07878	2.00067	1.03297	1.07543
0.978461	1.0494	0.804007	1.02785
1.05563	0.644481	0.813593	1.1479
1.38913	1.64679	0.926129	0.966303
0.808236	0.865113	0.887281	0.943585
0.92605	0.440824	0.966561	1.06715
0.953698	0.523476	0.922968	0.975269
0.921845	0.874074	0.879194	1.13644
0.91745	1.04246	0.884192	1.1061
0.879423	0.567878	0.576972	0.971054
0.886771	1.16028	1.20044	1.50182
0.927738	1.34247	1.02795	0.823678
1.01881	1.00278	0.981824	0.869355
0.98562	1.08792	1.00124	0.895204
0.789436	0.869209	0.92755	0.924542
0.939178	1.18779	0.86862	1.02063
1.07636	0.965869	1.03452	0.840426
1.12558	1.07721	0.786801	0.993054
0.808236	1.08955	0.906252	0.996188
0.878976	1.01665	1.09473	1.02253
0.937048	1.09029	1.01385	0.85757
0.778741	1.05386	0.98061	1.12065
0.931122	0.961535	0.904974	1.19236
0.942519	0.908946	0.976568	0.978073
0.987121	0.465145	0.827715	1.03134
1.01383	1.12621	0.973923	1.38424
0.937377	1.08303	0.918532	0.901883
0.886635	1.12247	0.792555	0.777937
0.896404	1.06834	0.755116	1.05268
0.955089	1.18732	1.08222	1.17417
1.1379	1.29693	0.760132	0.865421
1.17472	1.16358	1.10086	1.06315
1.04849	1.28276	0.865046	0.910834
0.973821	2.14403	1.10872	1.08879
0.95065	1.18954	0.89873	1.01722
1.21663	1.01359	0.791865	1.20486
0.888171	1.13594	1.04347	1.03446
0.973025	1.07797	1.32449	1.0869
0.825982	1.094	0.830606	0.888882
0.80521	1.04133	0.756886	0.855594
0.813078	1.11938	1.07089	0.831993
0.841455	1.38849	1.13417	0.341934
0.966255	0.565549	0.69062	1.01803
0.861516	0.679848	0.759488	0.880397
0.893033	0.893718	0.923772	1.05926
0.984023	1.97837	0.922354	0.944136
0.770059	1.27209	1.34386	0.980459
0.861237	1.50864	0.96962	0.749676
0.844938	1.01768	1.2933	1.09114
0.89309	1.02404	0.800632	0.748113
1.07091	1.05753	1.00574	0.973737
0.955409	1.10256	1.20321	0.971695
0.873841	0.935882	0.666784	0.966358
0.662206	1.27371	1.07709	0.831893
1.00622	1.02454	0.652903	0.960919
0.999217	1.06439	0.753379	0.898073
0.878513	1.2054	0.778218	1.04042
0.939838	0.525596	1.15251	0.978251
0.923238	0.472784	0.965388	0.910187
0.836276	0.515497	0.882336	1.15965
0.896798	0.91752	0.693228	1.09375
0.957965	1.74799	0.725277	0.723197
0.992748	0.889919	0.92576	1.04935
1.06102	0.967858	1.10013	0.910381
0.919622	0.990584	0.79112	0.897261
0.924063	0.520895	1.07384	0.89511
0.776185	1.48383	1.07283	1.08943
0.967634	1.42801	1.35125	0.944738
1.04285	0.445721	0.956165	1.05336
0.998065	0.44575	1.02137	0.991297
0.844183	0.944612	0.442855	1.02121
0.855732	0.523553	0.89622	0.888786
0.831815	1.07707	0.466989	0.986504
0.806421	0.956856	0.89384	0.937179
0.883376	1.28477	1.06128	0.937085
0.931866	1.18648	0.975628	1.03775
0.969616	1.20376	0.837359	0.972737
1.443	1.12116	0.531595	0.997497
1.04226	1.45479	0.893329	0.891132
1.08543	1.63656	0.817386	0.960528
0.854106	1.70372	0.948937	1.54687
1.07973	1.47842	0.65824	1.03491
0.852398	1.2677	0.745314	1.14244
0.855288	0.462734	0.694708	0.973234
0.982435	1.78642	0.798452	0.876452
0.973447	0.727603	1.07791	1.04867
0.789173	0.448622	0.856167	1.12085
0.939414	0.633642	0.985677	0.947434
0.993857	1.20366	0.903057	1.04957
0.889967	1.37899	1.2607	1.08869
0.947264	0.488846	0.858562	1.33794
1.10077	1.25575	0.978496	1.14385
0.980464	1.49475	0.960035	1.03804
1.08783	0.937704	0.795365	1.16558
0.82629	1.28542	0.864385	1.02715
1.23537	1.37584	0.848726	1.20676
1.04137	0.454666	0.771839	1.24317
1.26795	0.908874	0.894121	1.00677
1.19175	0.99655	0.96418	1.04365
0.939602	1.07364	0.984972	0.845278
1.01486	1.71475	1.08876	1.06542
1.01101	1.12295	0.720799	0.995101
1.01807	1.47872	0.800724	0.997695
1.15363	0.909355	0.73888	1.15457
1.11521	1.04117	0.787395	1.22419
0.978725	1.08379	0.938431	1.01967
1.01914	1.00738	0.983115	1.21516
0.99836	1.02861	0.892187	1.25331
0.862961	1.04177	1.07018	0.906173
0.922131	0.880089	0.821062	1.01012
0.976919	1.13944	1.04244	1.10186
1.14832	0.90473	0.854792	1.13931
1.15816	1.0112	0.761507	1.07146
1.03743	1.12586	1.01526	1.18099
0.991163	0.474854	0.867387	1.00041
1.1057	1.15079	0.880632	1.03365
1.14244	0.443022	0.854708	0.94126
1.03884	0.706462	0.937951	1.05652
1.15749	1.25504	0.829634	0.693677
0.937066	0.918935	0.948981	0.932013
0.767948	0.8071	0.772436	1.59677
1.12332	0.708625	1.02468	1.03512
1.18438	1.03443	1.01519	1.16184
0.970156	0.445936	0.968217	1.08954
1.07522	0.535921	0.883821	0.95563
0.976858	1.17095	1.21991	0.992656
1.13274	1.10791	1.03288	0.883984
1.024	1.22611	0.970185	0.975368
1.05807	1.17647	0.865265	0.934689
1.17917	1.18131	0.821224	0.988197
0.898615	1.59082	0.86501	0.951182
0.750293	0.723574	0.899995	1.02466
0.938377	0.521911	0.922225	1.00366
1.42417	1.38639	0.962514	1.0571
1.00955	1.04546	1.14094	0.99073
0.875698	1.04057	1.04576	0.924987
0.805442	1.92263	0.931634	0.927438
0.874435	0.884494	0.878862	0.903474
0.892296	0.907794	0.840968	0.962137
1.01728	0.924887	1.05392	1.21845
1.17953	0.953626	1.13309	1.18653
0.988802	1.0861	0.962825	0.974222
0.785754	1.04415	0.475133	0.903334
1.00955	1.28688	1.19593	0.832044
0.853673	1.1172	0.93951	0.891039
1.14297	0.944769	0.885001	1.12232
1.25102	1.20734	1.06446	1.10071
0.87867	0.901818	1.17586	1.14745
1.0922	1.01332	1.06306	1.24869
1.07188	0.987396	0.710575	1.16197
0.781856	1.12494	0.995747	1.03485
1.08708	1.12427	1.04479	1.31365
0.925817	1.02474	0.678594	0.999621
0.91889	0.777791	0.827898	1.1983
1.2575	1.2058	0.793251	1.04274
1.12833	1.11434	0.739515	1.01366
1.13126	1.16473	1.02969	1.00756
0.93625	1.60627	0.921965	1.14229
0.840919	2.23462	0.793689	0.863951
1.35481	0.805439	1.19552	0.881568
1.05948	0.928116	0.604488	1.02292
0.949006	0.986681	0.971492	1.10762
0.993011	1.09601	0.636793	0.744933
0.972496	0.558899	1.13253	1.10976
1.0627	0.949985	0.903296	1.19329
0.985656	0.471044	0.79907	1.22737
1.05276	0.765063	1.27242	1.42985
1.0074	0.61254	0.905108	0.985578
1.06148	0.560663	0.926094	0.962939
1.03773	2.12167	0.966467	1.03624
0.961957	1.84775	0.728254	1.20731
1.15604	0.474004	1.10799	1.1818
1.06293	0.429395	0.776302	0.852948
1.19672	0.683554	1.41037	0.910737
0.955379	1.07357	0.671832	0.964026
1.09737	1.10131	0.784013	1.06544
0.960251	1.33685	0.959157	0.914789
1.16877	1.16615	1.0783	0.856018
1.10332	1.00665	0.836413	1.02844
1.02511	0.972245	0.996151	0.908739
1.10186	0.47392	1.05724	1.04288
0.769821	0.594937	0.859094	1.04513
1.27446	0.631254	0.925742	1.11372
1.25944	1.6326	0.826349	1.16232
1.01995	1.59083	0.82523	1.11112
1.1391	1.15663	0.822997	1.00263
1.14661	1.04102	0.971826	1.01456
1.05322	1.51879	0.996747	1.37375
1.10414	0.550033	0.830925	1.06364
1.15046	0.484038	0.850704	1.14247
1.06103	0.823537	0.838888	1.00079
1.02433	1.21171	0.894682	1.16039
1.07764	0.92603	0.890902	1.27665
1.02116	0.921054	0.924827	1.01189
0.950355	0.836376	0.906284	0.957769
1.02448	1.24869	1.00977	1.05485
0.874635	1.39718	0.900774	1.19471
0.80423	0.902181	0.774815	1.06201
1.30741	1.11739	0.963243	1.25265
1.04577	0.560205	0.964175	1.30342
1.18477	0.437812	0.891596	1.04646
0.874914	0.966223	0.899469	1.05148
1.20719	1.29448	1.15554	1.03084
1.04508	1.21247	0.905507	0.844166
0.854167	0.963621	1.02708	1.03909
1.19786	0.883333	0.993797	1.68216
0.924109	1.02072	0.995014	0.90925
0.982784	1.37564	0.920832	1.14877
0.982499	1.47077	1.25165	0.941231
1.22406	0.773371	1.11561	1.19752
1.32557	0.516451	1.11293	0.984465
0.92903	1.05595	1.09366	1.10304
0.987246	1.24244	1.09607	1.23372
0.880677	1.1711	1.15213	1.13927
0.853804	0.457072	1.07509	1.17957
0.935265	0.462972	0.790727	0.963115
1.00684	0.66738	0.942607	1.18044
0.943367	1.51357	0.956754	1.44836
0.953333	0.449492	0.689991	1.03786
0.994717	1.00844	0.705271	0.696843
1.02152	1.07832	0.971387	0.57727
1.13501	1.41966	0.920222	1.18023
0.929917	0.982138	0.73298	0.914824
1.15025	0.991943	0.933309	1.03096
0.901793	1.16347	0.861703	0.930057
0.959362	1.18267	0.752857	0.934183
0.967919	1.20867	0.930225	0.843981
0.977395	1.06882	0.817928	0.892801
0.930246	1.10882	0.888043	0.820271
1.04616	1.29898	1.06294	0.953087
0.974674	0.487415	1.09803	1.0572
1.10011	0.952127	1.03694	0.747076
1.04043	0.830144	0.987326	1.29911
0.98877	1.22651	0.954516	1.10618
0.94706	0.959169	0.913353	1.12016
0.924229	1.38015	0.992562	0.682429
1.08883	1.35929	0.89011	0.809387
0.998316	1.25149	0.896381	0.768079
0.718449	2.31585	0.944456	1.15289
1.08319	2.32773	0.990755	1.64326
1.1571	0.477891	0.701603	0.71391
1.00329	0.475601	0.865434	1.51986
0.884802	1.32339	0.777721	1.04187
0.99356	0.474827	0.812147	0.989515
0.810719	0.502471	0.603683	0.83475
0.97429	0.442012	0.782795	0.867577
0.910874	0.461008	0.62886	0.89214
1.15084	0.441629	0.852614	0.988396
0.982317	0.45326	0.717613	0.98286
0.863394	0.841078	1.09609	0.720283
0.934206	1.24787	0.86911	0.923035
0.944442	1.69438	0.731591	0.757047
0.970217	0.968328	0.691609	1.14085
0.946084	1.16367	0.802231	1.09576
0.892709	1.25706	0.873565	1.08969
0.919142	0.997652	0.971452	0.788207
1.11999		0.714449	0.953327
0.923857		1.29558	0.958971
1.09497		1.34463	0.707024
1.02767		1.14507	0.845431
1.02624		1.13666	0.793315
1.00533		1.05995	0.898292
0.93595		0.847515	0.908812
1.1621		0.751413	1.45198
1.16651		0.955946	1.40188
1.14151		0.90369	0.988687
0.954628		0.995764	0.880997
0.904968		0.905475	0.811474
0.957196		0.941062	0.866104
1.07574		0.90599	0.883345
0.972798		1.00549	0.910126
1.0621		0.954971	0.896907
1.20708		0.885606	0.883739
1.20806		0.875962	1.00916
0.974619		1.05016	1.04926
1.0197		0.915567	0.83944
1.29388		0.817688	1.31465
0.973385		0.708776	0.912586
1.11762		1.26047	0.91045
1.10119		1.14446	1.16722
0.79218		0.513637	0.469405
1.00345		0.660282	0.86911
0.954839		0.508364	0.743787
0.895478		0.932473	0.864956
0.843314		1.00238	0.686743
1.10183		0.637915	0.821361
0.97073		0.651338	0.832577
0.964331		0.792625	0.368414
1.0358		1.16479	0.619323
0.777589		0.895355	0.598396
0.895354		0.818121	0.888029
0.905565		0.934006	0.744077
0.893253		1.07331	1.01423
1.02325		1.23456	0.833399
0.942462		0.754456	0.845205
1.04143		1.16461	1.00476
1.12256		1.10445	0.486725
0.968759		0.955872	0.942615
0.908171		0.724631	1.4642
1.12305		1.15021	1.19966
1.13938		1.19165	1.09926
0.789969		1.26735	0.985172
0.888332		1.13838	1.11632
0.872441		0.947283	1.16556
0.801815		1.213	1.14595
1.13548		0.84523	1.0396
1.10438		1.05843	1.10906
1.20702		1.21093	1.09531
0.810139		0.730943	1.0278
1.08734		1.2521	0.829673
0.943465		0.956555	0.754319
1.20277		0.935032	0.794167
1.09643		1.03493	1.12398
0.979344		0.928607	0.692792
1.25391		1.24641	0.987908
1.0188		0.988975	0.878962
1.20696		1.06123	0.78666
1.199		1.10074	0.804865
0.952401		0.985504	1.31765
0.721472		1.16087	0.858976
1.07706		1.03226	1.00254
1.49421		1.12845	0.740017
1.05141		0.882189	0.362551
1.08366		0.919144	1.11469
1.08863		1.11269	1.01892
1.00141		0.953422	1.01913
1.02809		0.851045	1.01464
0.94791		1.04402	1.15963
1.12674		0.856886	0.988762
1.101		1.03063	0.838822
1.27018		1.16393	0.699169
0.92295		1.00189	0.741903
0.858638		1.1701	0.917089
1.12365		1.12805	0.775793
1.32037		1.08129	0.760195
0.940922		0.939221	0.969249
1.47301		1.00707	0.551071
1.11423		1.11967	1.23721
1.07518		1.1092	1.29279
1.11142		1.01782	1.34514
1.14898		0.411851	0.864847
1.07876		0.42797	0.667094
1.37706		1.04764	0.618676
1.4717		0.766595	0.993507
0.98104		0.761552	0.877392
1.03109		0.661624	0.892138
1.05068		0.988922	0.961306
1.04555		1.02552	1.27722
1.03524		0.859179	1.01555
0.948788		0.877216	1.09421
1.05098		1.06181	1.11185
1.04207		1.41536	0.782855
0.903739		0.869684	0.945751
0.945928		0.985002	1.02659
1.26696		0.861104	0.413081
1.13685		0.809752	0.934079
1.11583		1.04326	0.966591
1.41423		0.811219	0.97572
1.25843		0.744738	0.983917
1.16957		0.94253	1.05266
1.14788		0.950833	0.776171
1.028		0.832396	0.752893
0.952224		0.891207	0.599057
1.16037		1.03757	0.56596
1.27491		1.17447	0.378093
0.9072		0.891965	1.13624
1.08057		0.652682	0.863951
1.23056		0.894398	0.790149
0.922875		0.913733	1.12703
1.11414		0.876085	1.1988
0.867869		1.02634	1.16633
1.03538		1.11264	1.03312
1.14399		1.05939	0.924773
1.12036		1.3629	1.04603
0.997559		1.31444	0.592463
1.05742		0.919936	0.925164
0.934442		0.868317	1.00918
0.985688		0.845067	0.993291
1.26547		0.836529	1.06689
0.989373		0.90589	1.16276
0.935538		1.29961	1.26334
1.16847		0.887685	0.80763
1.08995		0.885507	0.875825
1.15184		1.01802	0.94637
0.875022		1.04968	1.57197
1.0848		0.977239	0.898568
1.00454		0.8824	0.988021
1.01286		0.897913	0.941152
1.14086		0.847139	0.920173
1.11127		0.922871	0.960952
0.889609		1.17003	0.981881
0.827789		0.854505	0.943449
1.1893		1.17699	0.883395
1.13228		1.09361	1.03185
1.22699		1.10852	0.974866
1.12454		1.0491	0.930537
0.999473		1.06978	0.867119
1.03705		0.839804	1.16641
1.11124		1.06909	0.975455
1.14084		1.35966	0.908505
0.872734		0.971026	0.805054
1.04674		0.853402	1.00714
0.912106		1.06214	0.998368
1.15398		1.03054	0.534602
1.18113		0.989531	1.50115
1.04581		1.00989	1.16049
1.0678		1.09762	1.0991
1.03898		0.633536	1.03279
0.930312		1.09882	0.951469
0.820236		0.860233	0.937035
1.28052		1.06552	1.03705
0.982778		1.07804	0.89872
0.909033		0.827468	1.10782
0.988026		0.94105	1.03972
1.05456		0.841622	0.834644
0.858424		0.861156	0.903856
1.00123		0.922305	1.03699
0.891201		0.949147	1.04578
1.0331		0.924752	0.889761
1.12787		1.02762	1.27389
0.923846		1.02059	1.0816
0.967411		1.2507	1.24494
0.867928		1.10779	1.027
0.912793		1.00461	0.942102
0.956835		1.28694	0.887786
0.982195		0.971853	0.886242
0.968774		0.943535	1.01242
0.996375		1.10323	1.00923
0.632066		0.935948	0.954649
0.952474		0.814722	1.12444
0.893957		0.83996	0.924015
0.960596		0.784088	0.852939
1.09165		1.06402	1.15578
0.819406		0.904321	1.10005
0.941702		0.833933	1.08974
0.869831		0.935579	1.08706
0.924769		1.10329	0.743765
1.16542		1.00892	1.01807
0.944134		0.853194	0.786563
0.986248		0.796004	1.05492
1.02633		0.847889	0.870447
1.0411		0.845778	0.994168
1.06887		0.867719	1.00053
1.02677		0.992057	0.986128
1.08146		0.985613	0.949151
1.06109		0.939429	0.779396
0.93158		0.719227	1.02663
1.08739		0.923857	0.885169
1.09983		0.812423	0.94914
1.10029		0.732907	0.794838
1.13402		1.09131	0.924263
0.924676		1.02427	0.757767
0.963011		0.745712	0.866236
0.901523		0.927901	1.01521
0.837773		1.00142	1.03816
0.736407		0.704434	0.881862
0.837152		0.945971	0.966346
1.01668		1.05466	1.04173
1.09908		0.765183	0.985375
1.12242		0.752663	0.770372
1.20171		0.689993	1.34049
0.86211		0.752089	0.880843
0.85969		0.790474	0.864802
0.853691		0.865506	0.918701
0.99237		0.634145	0.945862
0.992753		0.752554	0.8578
0.879332		0.868459	0.932822
1.03124		0.734012	0.828893
0.977337		1.15688	0.600314
1.1771		0.818589	0.997436
0.908887		0.828557	0.863275
1.08648		0.904034	1.09437
0.98747		0.754362	0.986395
1.07032		0.979172	1.12471
0.852196		0.901344	1.09673
1.13683		0.916312	1.09193
1.15024		0.870162	1.09
0.927615		0.736786	1.2354
1.05994		0.879269	1.24555
0.835798		1.04403	0.895772
1.0577		0.827296	1.14995
0.849803		0.840807	0.898536
0.869853		0.852711	1.12834
1.04579		1.03856	0.993594
1.09068		0.929273	1.04262
0.971027		1.01124	0.89413
0.923469		1.04574	0.741259
0.996722		1.33865	1.00813
1.01437		0.703033	0.933337
0.977581		0.884043	0.77525
0.978818		1.14124	0.971739
0.990317		1.41988	0.912413
1.00361		0.941456	1.08876
0.877281		1.01356	1.07024
0.900618		1.17017	0.843782
0.913571		1.38323	1.16714
1.08615		1.36685	0.91543
1.07174		0.911212	1.19403
1.08484		0.443401	1.43219
0.904435		0.605641	1.13976
0.965928		0.523213	1.24174
0.850146		1.11027	1.04192
1.00065		0.904509	0.96264
0.895744		0.886481	0.845849
0.956881		0.817729	0.731774
0.876991		0.676223	0.711102
1.18321		0.786543	1.04611
0.996441		0.872229	1.13423
1.19633		1.1146	0.987762
0.981002		0.719283	1.02747
0.94459		1.21388	1.01842
1.13714		0.750663	0.947265
0.9508		0.785399	1.0615
0.855603		0.976999	1.26856
0.957459		0.857473	1.29189
1.05655		0.912482	1.30399
0.951011		1.14776	1.06179
1.0615		0.790774	1.12826
1.03807		0.741192	1.14314
0.958577		0.561576	1.01374
0.883603		0.889637	1.07998
1.05989		0.816182	0.906153
0.94901		0.928206	0.804875
1.07384		0.755696	1.0159
1.1635		0.973684	0.991052
1.06176		1.00155	0.750995
1.13465		1.17624	0.849013
0.875562		0.884991	0.862535
0.767943		0.719811	0.877867
0.810107		0.953897	0.849595
0.988489		0.721794	0.855787
0.938305		0.963927	1.10036
0.663969		0.883383	0.931839
0.770533		0.721875	1.24426
1.10009		0.938654	1.39751
1.0352		1.0492	0.775174
1.03372		1.02713	0.819039
1.09384		0.883477	1.41456
1.37074		0.738829	1.18306
1.20833		0.878946	1.11376
1.17975		1.00409	0.789489
1.3004		0.993311	0.890724
1.36629		1.14895	1.19649
1.02588		0.712258	0.89209
0.955708		0.824838	1.13289
0.800044		0.994275	1.00576
0.994604		1.00122	0.929285
1.23996		0.832629	1.5012
1.11113		1.03626	1.1777
1.20056		0.801075	0.584795
1.20297		0.842726	1.21712
1.22582		1.04388	1.52018
1.27804		0.765723	0.957575
1.19782		0.870353	0.873256
1.27607		0.909076	1.26435
0.950051		1.05151	0.819031
1.38766		1.12358	0.740207
0.851958		0.873457	0.899215
0.865322		0.857005	0.983744
0.820847		0.937699	0.430763
0.877524		1.03379	1.00244
0.899005		1.13523	0.893341
0.904846		1.10304	1.54917
0.926733		1.10021	1.24072
0.969208		0.913589	1.08471
1.04367		0.779781	1.26357
1.04807		0.878976	0.98723
1.20442		0.744393	1.41851
0.976205		1.08045	1.25014
0.883854		1.07826	0.970611
1.18137		1.08458	0.908571
0.958214		1.05327	0.821133
1.02458		0.990522	0.549828
1.00117		1.0386	1.077
1.15341		1.28699	1.69375
1.03529		1.02404	1.55337
1.16311		0.927735	1.21976
1.16523		0.851176	0.759772
1.08709		1.0959	0.672312
0.90598		0.814472	0.89763
1.0378		1.01357	1.0374
1.00809		1.16153	0.787281
1.33584		1.08141	0.881773
0.795442		1.11215	1.07179
0.970004		1.01751	1.0185
1.44032		1.20799	0.953296
0.909058		1.03714	1.09273
0.829121		1.01173	1.03332
0.85681		0.930042	0.822683
0.891997		1.08637	1.12993
0.885449		0.894022	1.10647
0.754709		0.802299	0.789233
0.836204		0.897831	0.977143
0.87563		0.736685	1.09356
0.910677		0.837918	1.20902
1.03767		0.951446	0.968204
0.860949		1.01996	1.0817
1.05077		0.981537	1.03792
1.15682		0.773105	0.991544
0.933018		0.862823	0.782934
1.16115		0.774323	0.803382
0.938767		0.917774	1.15221
0.906715		0.743329	1.11413
1.08874		0.751529	1.20605
1.14125		0.833057	0.911473
1.09416		0.646954	0.778724
0.942399		0.831165	1.0693
0.962045		0.717925	1.00228
0.921999		0.862639	1.03567
0.873666		0.788766	1.29426
0.894292		0.687273	1.66471
0.909001		1.28228	1.11218
0.996234		1.09671	0.904648
0.932823		0.90163	0.941666
0.963971		0.765188	0.784775
0.889672		0.931585	1.09482
0.959301		0.457466	1.04932
1.11746		0.874526	1.02301
1.00924		0.897561	1.03396
1.17799		0.887116	0.881816
0.755539		1.21835	0.91002
0.858286		0.817316	1.07507
0.936849		1.09842	0.900762
0.909049		0.716716	1.01536
0.981954		0.795201	0.88133
0.953728		1.35323	0.996708
0.92899		1.03139	0.949317
0.878776		0.882865	1.14145
1.06506		1.1537	1.03402
0.835347		0.976923	1.25608
0.776308		1.07122	1.05649
1.06606		0.859689	0.884237
0.82206		1.01143	1.07197
0.859633		0.985546	1.14938
0.915408		0.968345	0.888796
0.958534		1.01191	1.26054
0.878227		0.789912	1.17869
1.08378		1.14509	0.955187
1.0196		0.623384	1.19573
1.06371		0.837821	1.18684
0.841039		0.721573	1.11127
0.971299		0.736034	1.19726
0.974263		0.709793	1.09738
0.931419		0.83472	1.11615
0.931906		0.708778	0.954625
0.908302		0.682052	1.2081
1.1466		0.816937	1.10611
1.02158		0.797528	0.900376
0.799127		1.09329	1.35613
0.848753		0.806541	1.14378
0.90295		0.716944	1.00478
1.07353		1.24182	0.929502
0.845054		0.643331	1.12891
0.842443		0.687451	1.05395
0.918073		0.80246	1.02558
0.966025		0.867553	0.851114
0.851448		0.871629	1.08851
0.911088		0.929463	1.47163
0.930552		0.870798	0.75726
0.838719		0.76005	0.909755
0.868198		0.744569	1.04563
0.970072		0.803841	0.831393
1.06086		0.922082	0.934392
1.11437		0.871137	0.701795
0.876615		0.813759	0.851896
1.18317		0.793266	0.975207
0.865864		0.895722	1.6812
1.00492		0.80068	0.809479
0.913941		0.682391	0.52086
0.915966		0.690755	0.861711
1.02273		0.928738	0.979848
1.05071		0.718403	0.874285
1.29793		0.993638	0.878726
1.0029		1.24524	0.855783
0.923201		1.09989	0.844963
1.11457		0.8896	0.972306
1.30619		1.11842	0.807021
0.946109		1.05661	0.775409
1.04997		0.757426	0.929127
1.05481		1.03812	1.2761
1.2022		0.910057	0.714184
1.2243		0.704912	1.13483
1.24229		0.941647	1.07821
0.878924		0.908891	1.01681
0.911995		0.817479	1.51302
1.05134		1.34513	1.36467
0.905027		0.795721	1.1556
1.11243		0.705669	1.16367
0.739041		0.857647	0.981896
0.890763		0.874417	1.17392
0.879751		0.892432	1.25502
1.18964		0.927208	0.982704
1.21398		0.979259	1.18477
0.966774		0.856896	1.1592
1.07638		1.05631	1.07259
1.06598		1.03943	1.00232
1.02269		0.849305	1.03593
0.855143		0.840607	0.918218
0.806648		0.951387	0.936684
0.818018		0.784511	1.25707
0.850264		0.808172	1.09577
1.47736		0.886262	1.00684
0.970199		0.898292	0.99315
1.00848		0.730381	1.11664
0.916166		0.823119	1.03861
1.15222		0.792424	1.04728
1.01757		0.879464	1.079
0.874172		0.884333	0.893457
0.912485		0.907361	1.01717
0.927574		0.984608	1.08038
0.869549		0.961155	0.810717
1.13876		1.1694	1.11079
1.1499		0.792494	0.986052
0.857052		0.797628	1.1185
0.947847		0.962647	1.16285
1.15772		0.854886	0.997708
0.838281		1.0648	1.10018
0.962276		1.06924	1.24367
0.855054		1.21336	0.856136
0.814752		1.22522	0.923619
0.817506		1.20254	1.31181
0.845508		0.988328	1.31165
0.826555		0.881118	1.46846
0.814001		1.26318	1.38033
0.828179		1.15074	0.847164
0.848418		1.0616	0.981942
1.09409		1.25153	1.13724
0.828252		1.20154	1.17463
0.86285		0.732742	0.970051
0.871942		1.23846	0.996408
0.939727		1.18253	1.00328
0.846503		1.4122	0.846738
0.998103		0.963305	1.07855
0.985955		0.781364	0.822932
1.02318		1.04124	0.939815
0.92478		0.715283	0.955694
0.984699		1.16265	1.00853
0.892321		0.737804	1.05759
0.890037		0.928903	1.19378
0.903156		0.572487	1.04014
0.970346		0.632648	1.04103
0.975136		0.879764	1.00787
0.970816		0.734579	1.09196
0.891387		0.824752	1.16967
0.923653		0.579514	1.23617
1.08128		1.01805	1.19538
0.955272		1.21547	1.217
1.05728		1.26123	1.29412
1.20903		0.75575	1.09104
0.904134		0.981705	1.11299
1.01489		0.927342	0.981447
0.905594		0.806472	0.552781
0.826955		1.29377	0.670517
0.88419		0.759347	0.858203
0.999893		0.869548	0.803464
1.09409		0.809101	1.05907
1.17697		0.705327	0.905849
0.941231		1.00071	1.1392
1.01366		0.577948	0.866167
0.869897		1.25431	0.864033
1.0522		0.511	0.779812
1.06059		0.577168	1.18558
1.01482		1.17149	0.966209
1.009		1.31615	1.00084
0.827163		1.25138	1.00647
1.10713		0.760101	1.07721
0.975495		1.32005	0.96511
0.921092		1.44189	1.03421
0.834351		1.07957	1.06251
1.1261		1.05637	0.895824
1.01875		0.916515	1.19501
1.16444		0.713811	0.886378
1.04105		0.756488	0.841773
1.07324		0.762731	0.925062
1.22563		0.849312	0.837079
0.940133		0.657482	0.980868
0.921541		0.791894	1.10415
0.913626		0.771508	1.20957
1.04448		0.855074	1.04569
1.08167		1.02525	1.10486
0.936034		0.774716	0.852144
1.0796		0.937983	0.833302
1.34602		0.80308	0.757827
1.097		0.793471	0.747728
1.04139		0.870043	0.828562
0.971342		1.12561	0.810529
0.968532		0.830015	0.794056
0.853033		0.974046	0.905797
1.16375		1.35636	1.02323
1.13449		1.22709	1.03632
0.595563		0.948533	0.891883
0.84529		0.776718	0.832487
0.989571		1.16251	1.17639
1.1581		1.06194	1.12413
0.708528		0.997111	0.757792
0.873278		0.491227	1.12252
0.932553		0.826834	1.3788
0.924267		0.974697	1.03885
0.948067		1.17829	1.09246
1.07732		0.819114	1.13296
0.839427		0.766839	0.996869
1.13758		0.962981	1.0615
0.964286		1.06015	0.871429
0.950652		0.472836	0.883112
1.12184		0.922081	0.840671
0.955227		0.986958	1.05738
1.15299		1.00234	1.0077
0.96928		1.01674	1.17328
0.908658		1.28481	1.07975
0.84429		0.893165	0.770703
0.846367		0.876655	1.23169
0.883603		0.947375	1.16933
1.06472		0.499168	1.14147
1.17661		0.44112	0.865369
1.13001		0.95214	1.22846
1.07148		0.994935	1.16704
1.04587		0.861691	1.25563
0.911698		0.811256	1.23689
0.97405		0.672893	0.902821
1.03156		0.610276	1.3458
1.47251		0.695498	0.997801
0.883462		0.920352	0.810381
1.12615		0.843354	1.33246
0.826794		1.12835	1.51648
1.01115		0.714904	1.03083
1.0385		0.879971	0.94608
0.830713		1.24944	0.700115
0.974613		0.720486	1.02501
0.781107		1.03406	1.08894
1.05028		1.38462	0.961013
0.85509		1.13258	1.10544
0.999693		0.935565	1.08903
1.06979		0.624612	1.11745
0.879271		1.36937	1.11103
0.940713		0.75451	1.25158
0.947756		0.848569	1.11547
0.90608		0.857322	0.955738
0.902013		1.12076	1.5596
1.02353		0.743079	1.21093
0.951893		0.809704	0.989604
1.08433		0.926309	1.07168
0.977906		0.589423	1.02828
1.0303		1.07378	1.04149
1.21317		0.855933	1.24966
1.31927		1.37759	1.18214
1.37636		0.859775	1.09571
1.01671		0.822255	1.00334
1.10537		0.891445	0.936355
1.09282		0.962649	0.867538
1.10976		0.797253	1.26821
0.862752		0.940105	1.19738
0.66459		0.933525	1.14414
1.18894		1.04044	1.13377
1.46475		0.912311	0.960966
1.1936		0.917215	1.01644
1.1066		0.929741	0.942112
1.11008		0.991552	0.833883
0.89238		0.972868	1.10695
0.843335		0.938666	0.787526
0.978534		0.813447	0.941631
1.0348		0.955258	1.13921
1.0676		0.973311	0.928572
0.924973		0.931381	0.522964
1.04178		1.06532	1.15176
0.909865		0.707578	1.18073
0.89969		0.778768	0.957865
0.897345		0.801123	1.06128
1.02095		0.888516	1.17999
0.997788		0.745123	1.48656
1.13159		0.900113	1.13073
0.951659		0.889184	1.0853
0.857254		0.899454	1.05392
0.918148		0.958118	0.961974
1.13898		1.08449	1.39469
1.05559		0.69965	1.19575
0.764815		0.837574	0.464405
0.981415		0.825577	1.15473
1.03805		0.781702	1.25731
0.601503		1.03787	1.48506
1.28418		0.826534	0.432504
1.07301		0.766874	0.464723
0.952081		0.809004	0.538227
0.992131		0.879989	0.8638
1.07833		0.682738	0.867812
1.02918		0.91516	1.13913
0.910516		0.64195	1.28199
1.01346		1.07006	1.02167
0.996978		1.00534	0.856535
1.06273		1.17761	1.18775
1.16622		1.06883	1.08793
0.964349		0.919519	1.1575
1.10666		0.986373	1.17604
0.951802		1.21974	1.41324
0.908636		0.819703	0.893539
0.927549		0.835514	0.98813
1.12633		0.751592	1.24412
0.882847		0.914322	1.37295
1.13729		0.933579	1.27382
0.797308		0.926488	0.519203
0.917785		0.943151	1.27663
1.08166		1.063	1.42165
0.834716		0.87566	0.942333
0.936023		1.00071	0.938194
0.976402		0.849973	0.980834
0.970339		0.921614	1.51627
1.04736		0.969801	1.32
0.911106		0.680272	0.482416
0.998849		0.935488	0.446909
0.808803		0.920107	1.16042
0.822992		0.94212	0.988661
1.02857		1.01503	1.23612
0.99259		0.879534	0.825845
0.776537		0.871494	1.17512
0.943478		0.642868	1.01614
1.1027		0.972918	1.28307
0.796049		0.994754	1.03007
1.01277		1.24114	0.891997
0.78333		1.38844	1.06488
0.781441		1.05898	1.23761
0.871922		1.11474	1.27542
0.883578		0.812447	1.3519
0.925767		0.921389	1.23969
0.869559		0.97646	1.24458
0.897454		0.810892	1.02501
0.92825		1.08447	0.989412
1.05829		0.841282	1.48065
1.04286		0.916009	1.73566
1.05599		0.642618	1.18765
1.00406		0.939911	1.38553
0.85818		0.791511	1.20236
0.910775		0.95236	1.19206
0.930155		0.89365	1.37828
1.00213		1.19102	1.39558
1.15053		1.00625	1.3044
1.04429		0.825019	1.19618
1.00996		1.08997	1.0068
0.874707		0.633187	1.01067
0.869134		1.27822	1.21185
0.954243		0.807783	1.11465
1.02643		1.05765	1.0677
0.836664		0.911475	0.904721
0.936758		0.754398	1.18483
0.806598		0.893143	0.445757
0.889822		0.828564	1.02668
0.883911		0.815219	0.859903
0.995354		0.909416	0.957296
0.792801		0.809774	1.04418
1.00864		0.867666	1.00108
0.91451		1.02693	1.04084
1.03215		0.996353	1.04873
1.14864		0.816554	1.1097
0.930478		1.32886	1.05199
0.925358		0.836785	1.19223
0.95857		0.90943	1.23368
0.973048		0.76849	1.42451
0.865471		1.14197	1.04055
0.858978		0.873722	1.11778
0.773559		0.71958	1.09093
0.775206		0.780674	0.667632
0.871357		0.822588	1.14108
0.802475		0.628397	0.92715
0.808125		0.653252	0.965166
0.764139		0.679272	1.11381
1.16913		0.834487	1.02131
1.11552		0.627597	1.31898
0.763815		0.865256	1.37584
0.81502		0.833826	1.10601
0.805664		0.79329	1.07361
0.876871		1.14537	1.09042
0.762581		0.973647	1.24639
0.975726		0.906921	1.4315
0.799338		0.814494	1.20361
0.933848		1.04395	1.14044
0.893453		0.889205	1.19353
1.16564		0.777815	0.969391
0.774518		0.800179	1.00136
0.762264		0.890033	1.19506
0.984785		0.85172	1.06643
0.970201		0.931856	1.36107
1.16772		0.883247	1.63286
0.899443		1.05275	1.11556
0.950081		0.853614	1.51175
0.933022		0.922678	1.05318
0.931274		0.760906	1.11965
0.985205		0.71862	1.0173
0.724513		0.775087	1.09604
0.981038		0.987017	1.10034
1.0729		0.668903	1.07614
0.986552		0.797457	0.942374
0.957452		0.89462	0.960847
0.88676		0.668953	0.948527
1.02445		1.1309	1.73185
0.944438		0.774573	1.15447
0.948899		0.759039	1.36533
0.955068		0.895293	1.34917
0.977817		0.742628	0.89184
1.05135		0.771263	0.92177
1.16068		0.917356	1.25808
0.895308		0.971625	1.06822
1.2612		0.926502	1.23532
0.899055		0.718982	1.12003
0.877529		0.874061	1.18877
0.945463		0.87715	1.56155
0.916093		1.0256	1.25892
0.967919		0.812004	1.01709
0.785258		0.798895	0.890511
0.978797		0.901128	0.883689
0.933841		0.907734	1.29294
0.880969		0.975734	1.22218
1.02178		0.951228	1.49677
1.08944		0.948367	1.2685
1.08833		1.11221	1.16546
0.86954		0.913564	1.26497
0.941736		1.11841	1.16421
1.05577		0.70516	0.984152
1.22255		0.863231	1.41681
1.00958		1.04951	0.978938
1.13578		0.975689	1.07638
0.842555		0.97309	1.14939
0.812448		0.839879	1.43865
0.930223		0.78433	1.15335
1.01539		0.94082	1.07279
0.994855		0.859917	1.10381
0.823632		0.911359	0.983937
0.896039		0.85131	1.20073
0.926753		0.666203	0.874948
0.934592		0.880684	1.15696
0.98576		1.23657	1.13639
0.899797		1.18116	1.0789
0.927631		1.14289	1.01884
0.980927		0.887281	1.24835
1.15205		0.798588	1.30683
1.10045		1.14458	1.43843
1.05539		1.15164	1.01163
0.982603		0.970729	0.980256
1.13211		0.989069	0.493308
0.824566		0.977326	1.00559
0.963751		0.893118	1.23769
0.968715		0.507315	1.31314
1.15129		0.892548	1.36708
0.942219		0.87559	1.20391
0.939548		0.940033	1.39667
1.02947		1.0465	1.12865
1.0688		0.895794	1.54404
0.907792		0.928513	1.3608
1.01363		0.960092	1.33359
1.12593		1.01964	1.39212
1.14498		0.948469	1.11847
0.881219		0.86979	1.35034
0.889128		0.797937	1.30247
0.852936		0.882721	1.10031
0.87282		0.780189	1.30118
0.923197		0.944233	0.905939
0.819406		0.741945	1.14723
0.966118		0.817255	0.71682
0.89431		0.900162	1.0917
0.909008		0.722464	1.44474
0.970287		0.859552	1.4681
1.06348		0.919859	1.14732
0.897488		0.833916	1.05672
0.82076		0.8402	1.01443
0.881491		0.704243	1.11398
0.858869		0.875108	1.09308
1.00808		0.74041	0.881849
0.939765		1.15912	1.14823
0.988616		0.967558	1.44674
0.997049		1.01236	0.831482
1.0412		0.827589	0.975853
1.34477		0.74721	1.25285
1.02065		0.699899	0.886429
1.16675		0.769253	1.20866
0.897402		0.910807	0.458005
0.954576		0.994792	0.505796
0.972519		1.26784	0.469518
0.994241		0.748186	0.497218
1.03865		0.954449	0.943816
1.26622		0.935072	0.589902
1.17909		1.00949	1.01136
1.08959		1.04194	1.24735
1.05822		0.891038	0.977432
1.07478		1.0034	1.02012
1.04075		1.04218	1.22591
1.19208		0.810378	1.21434
1.19741		0.845701	1.52884
1.02571		1.05126	1.47281
0.994336		0.815611	1.10788
1.03439		0.891751	1.37953
0.945393		0.68956	1.1221
0.752053		0.682904	1.00983
1.01235		0.93525	0.965765
1.01378		0.905395	1.17354
0.97916		0.84224	1.18718
0.997098		0.831344	1.2041
1.02987		1.09912	1.26152
0.948677		0.669549	1.17048
1.07688		0.698394	1.20361
1.12924		0.682097	1.13953
0.967091		0.75773	0.766721
0.993261		1.2114	0.961027
1.0589		0.807678	0.94774
1.05837		0.653383	0.954095
0.977275		0.803053	0.963097
1.01027		0.741926	1.11847
0.882382		0.87514	1.09502
0.975576		0.890472	1.11121
1.06275		0.877895	1.32613
0.676566		0.96132	1.31407
0.996908		0.82821	1.22952
0.828817		0.750613	1.27327
0.968044		1.0019	1.10445
1.47741		0.837047	0.619076
1.37898		0.647569	0.430438
1.38673		0.827913	0.574004
0.95755		1.21823	0.871648
0.874601		1.11587	0.624728
0.883591		1.00231	0.457903
1.02693		0.840614	1.0762
1.05344		0.905541	1.05717
1.1809		0.657057	0.970977
0.967205		0.686174	1.05682
0.952798		0.918064	1.19321
1.06881		1.26245	1.14824
0.909967		1.05544	1.19398
1.18261		0.789068	1.33067
1.15651		0.910544	1.20833
1.07632		0.90849	1.07744
1.30458		0.826854	1.23832
0.918586		0.849746	1.00711
1.21452		0.96333	0.96439
0.965622		0.846132	0.989301
1.03765		1.28904	1.26005
1.1372		1.33966	1.30904
1.26673		0.707471	1.30708
1.31173		1.36609	1.30351
1.37488		0.936292	1.32085
0.979834		0.699343	1.18508
1.11526		0.830941	1.11735
1.0768		0.851152	0.469241
1.02519		0.638022	0.959174
0.985066		0.803615	0.505494
1.08477		0.825997	1.16873
0.982991		0.720306	1.07256
1.07804		0.659499	0.730401
1.1965		1.0464	1.01582
1.14328		0.867801	1.01611
0.955846		1.05092	1.13474
0.736058		0.958389	1.00666
0.800978		0.961951	1.27307
0.88737		0.539357	1.10048
0.94901		0.794125	1.3216
0.880441		1.02062	0.935295
1.18903		1.25331	1.02138
0.859529		1.08218	1.09848
0.968033		0.815698	1.00816
0.501623		0.912116	1.0883
0.480239		0.985505	1.19661
0.49321		1.28618	1.60632
0.956062		1.13774	1.04573
1.02452		0.769478	1.11937
0.94151		0.943589	1.05292
1.19657		0.960662	1.22468
0.952004		0.964216	0.996475
0.971213		1.35712	1.29475
0.929666		0.713709	1.27284
0.827161		0.666648	1.28573
1.14314		0.762693	1.04743
0.876166		0.771114	0.94456
1.01823		0.770369	0.911793
1.04442		1.0042	1.25038
1.01732		0.928643	1.19294
0.978355		0.84171	1.14591
0.978847		0.716033	1.35696
1.12047		0.848409	0.504684
1.06911		0.878687	0.433103
1.18863		0.904559	0.438413
0.76685		1.00204	1.12047
0.990133		0.949859	1.03818
0.969167		0.618444	0.527468
0.861505		1.03409	1.19938
0.900114		0.88232	1.20027
0.907157		0.764715	0.901573
1.06417		1.01407	0.961353
0.859801		0.90792	0.813078
0.989886		0.820708	0.613957
1.31138		0.934184	1.21306
1.01503		0.733104	0.454723
1.06285		0.683812	0.561147
1.08809		0.736401	0.464011
1.09635		0.824817	0.826353
1.16896		1.26516	0.60376
1.01447		1.00366	0.975626
1.45498		0.690708	1.02641
0.997872		0.931144	0.445959
1.15007		0.746143	0.644254
1.21461		0.744344	0.630532
1.09677		0.988188	0.568527
1.13132		0.705645	0.678305
1.06551		0.901014	0.566409
1.14761		0.813425	1.23891
1.48246		0.979787	1.28036
1.36527		0.951392	0.999135
1.03611		1.02215	1.05061
1.04429		0.95109	0.898901
0.988532		0.836129	1.60049
0.950838		0.975821	1.46274
0.936742		0.85754	1.01962
1.01987		0.932788	0.913868
1.03757		1.05873	1.01342
1.01219		0.827948	1.20039
0.904347		0.861139	0.883816
1.05014		0.803521	1.25244
1.06159		0.923223	1.02824
1.08714		0.766124	1.00814
0.848867		0.562881	1.03085
0.57862		0.713058	0.979469
0.878885		0.743212	1.19395
1.08575		0.861592	0.991902
1.13652		1.21022	0.997881
1.22128		0.743928	1.18993
0.956089		0.862578	1.04184
1.01703		0.664264	0.989836
1.1327		0.943766	0.844827
1.0897		0.403893	1.23866
1.35642		1.00363	1.22196
1.31763		0.732385	1.04644
1.15092		1.03617	1.13698
0.961346		1.04644	0.94632
1.10269		0.886576	1.63265
1.14557		1.38813	0.985797
1.16067		0.9089	1.02907
1.10065		0.860191	1.38342
1.38454		0.899784	1.08654
1.03282		1.19433	1.22617
1.07938		1.21167	0.988035
1.0015		0.969096	1.22416
1.16346		0.812645	1.02597
1.07711		1.04175	1.6163
1.44618		0.933663	1.18538
0.949545		0.877288	1.24952
0.807481		1.41442	1.18771
1.05684		0.849523	1.10584
1.0554		1.15732	1.16597
1.07743		0.558719	1.1959
1.27573		0.876204	1.32211
1.16662		0.772573	1.02046
0.836186		0.95803	1.18129
1.09239		0.877184	1.12827
1.03713		1.01719	1.12616
0.873825		1.06386	1.15771
0.945624		1.3412	0.441534
1.03146		1.26957	0.513687
1.0359		1.06146	0.946998
1.05505		0.92878	0.506685
1.0719		0.890229	0.483546
1.09599		1.07734	1.27771
1.17087		0.773951	1.35483
1.13026		1.01069	1.26668
0.999528		0.856347	1.48487
0.906715		0.922383	1.16835
0.945662		1.25082	1.50316
1.01489		1.11813	1.16259
1.10687		0.779968	0.952623
1.07726		0.834562	1.09255
1.22759		0.833753	1.17651
1.04929		0.760911	1.31979
1.20181		1.10184	1.1433
1.08024		0.902771	1.32938
1.21312		1.25231	1.01117
1.39046		0.863726	1.11783
0.943474		0.975531	1.07578
1.10289		0.895199	1.28304
0.997164		1.22085	1.17604
0.928466		1.05906	1.25701
1.41256		0.805408	1.61321
1.46093		0.473311	0.995683
1.11993		0.776845	1.09908
0.985522		1.31022	1.24671
1.00747		1.21	1.31297
0.506308		1.28132	0.917123
0.843881		1.07654	1.20458
1.07232		0.950134	0.531956
1.15599		1.01765	1.19847
0.562473		1.05147	1.0788
1.10834		1.18935	1.21538
0.869962		0.918077	1.06558
0.839493		0.858852	1.06242
0.901065		1.30129	1.47866
0.764464		1.03346	1.18785
0.939883		0.90576	1.21204
1.2068		0.691315	1.27415
1.08211		0.991933	0.949625
0.883494		0.955189	1.12993
0.90632		0.977334	1.26703
1.09534		1.06763	0.892841
1.24578		0.742467	1.03626
1.1762		0.693466	1.03157
0.546361		0.888554	1.12913
0.574175		1.32718	1.21749
0.587783		0.853857	1.13587
0.547518		0.976158	1.21798
0.901305		1.02604	1.03002
0.868057		0.692342	0.821128
1.10536		1.034	0.894505
1.1024		1.42139	1.48761
1.0575		0.73162	1.19467
1.31331		0.852958	1.21755
0.97102		0.860559	1.13417
0.873122		0.885195	1.32648
1.1233		0.8581	0.514485
1.23904		0.927924	0.520709
1.05472		0.723105	0.609947
1.22662		1.13995	0.535234
1.04553		0.891958	1.38351
0.971163		1.02935	1.24145
1.06721		1.12467	1.47841
0.845909		1.042	1.15279
1.1326		1.07421	1.09724
1.01469		0.779045	1.19759
0.957922		1.12437	1.00018
1.0558		0.769492	1.0175
1.24221		0.87461	1.22844
1.1592		0.787306	1.26899
1.3225		0.927613	1.19947
1.24628		0.76384	1.05857
0.887903		0.872652	1.20984
1.42567		0.58229	1.11258
0.920895		0.893775	1.1323
1.11538		0.987988	1.25149
0.888357		0.961317	1.20021
0.996937		1.1376	0.980913
0.927545		1.03014	0.841779
0.937196		0.90175	1.29756
1.18382		0.754291	0.942226
1.33226		1.0413	0.595345
0.775714		0.760134	1.0042
1.04306		0.842743	1.10801
1.05658		0.693343	1.05423
1.07993		0.717816	0.941535
0.502825		0.803257	0.956386
0.953853		0.918048	1.14582
1.03529		0.780522	0.949328
1.07271		0.963696	1.17589
0.5715		0.71931	0.980854
0.56889		0.798118	1.10878
0.575422		0.714153	1.3083
0.575209		0.728499	1.22985
0.522301		0.855206	1.00068
0.680077		0.854165	1.26281
0.585905		0.845728	1.15201
0.68694		0.758911	1.44347
0.908191		0.893129	1.22345
1.22681		0.803618	1.37936
1.47828		0.785317	1.18521
1.40078		1.00121	1.10457
0.926787		0.87659	1.37015
1.42665		0.955529	1.33389
0.935978		0.749143	1.15222
0.969165		0.735369	1.28122
0.85844		0.866052	1.06335
0.976207		0.948309	0.979827
1.07881		0.702726	1.08688
1.0738		0.978035	1.44698
0.9228		1.04611	0.455576
0.968285		0.768769	1.27823
1.14642		0.850135	1.03139
0.856417		0.883442	1.41556
0.918094		0.777666	1.29125
0.857415		0.965084	0.864439
0.809234		0.698138	1.30071
0.898656		0.719721	1.32259
1.01938		0.790812	1.16529
0.880266		0.75541	0.976733
1.13762		0.845553	1.03309
0.927835		0.828431	0.914258
1.21699		0.943413	1.15908
1.11595		0.813015	1.1675
1.0435		0.996361	1.33399
0.802919		0.728192	1.51803
0.938547		0.799458	1.00858
1.29255		0.867737	0.829239
0.960559		0.934447	0.95999
0.811906		0.753595	0.610296
0.915061		0.837633	0.626021
0.946041		0.647954	0.532639
1.15049		0.885301	0.629562
1.19431		0.825401	1.07268
1.01754		0.91106	1.01941
1.02222		0.888962	0.964764
1.16075		0.854151	1.1347
1.2943		0.82976	1.27295
1.16558		0.917434	1.36358
1.06936		0.770495	1.0479
1.08355		0.773734	0.989863
0.928767		0.729964	1.29213
1.0921		0.794854	1.02672
0.952483		0.756807	1.21671
0.880486		0.93349	1.0398
1.01329		0.859903	1.31479
0.979804		0.939255	1.31514
1.17771		0.850404	1.08989
1.00666		0.913156	1.29182
1.0034		0.774255	1.1302
0.842423		0.884605	1.25093
0.929203		0.850624	1.08567
0.820588		0.782289	1.2778
0.885299		0.933889	0.971757
0.808526		0.973547	1.24132
0.884782		0.902938	1.14468
0.935667		0.64366	1.51603
0.764838		0.811829	1.51034
0.936118		0.934354	1.4465
0.936431		0.924072	0.621859
0.839161		0.922172	1.02353
1.01268		0.789059	1.04679
0.884617		0.837068	1.00736
0.912709		0.990439	1.12665
1.08075		0.717065	1.11373
0.963431		0.875431	1.19529
1.05472		0.79375	0.827662
0.974864		0.841849	1.2123
0.866841		0.829368	1.02799
0.928541		0.861958	1.14317
0.884775		0.8047	1.06093
0.992689		1.0733	1.14362
0.924528		0.91004	1.01853
1.01934		0.843344	1.20544
0.911478		0.795119	0.525884
0.996971		0.811849	1.19993
1.17401		0.869767	0.716369
0.88708		0.915796	1.13792
1.06522		0.886436	1.14562
0.875764		0.911716	1.28701
1.17919		0.944073	1.07174
1.25461		0.920176	0.931732
0.921775		0.818265	1.26894
0.949972		0.841906	1.11449
1.08089		0.804076	1.15693
0.988602		0.861838	1.18735
0.903927		0.853312	1.23402
0.916517		0.958003	0.53471
0.991022		0.899634	0.479059
0.99836		1.02238	0.445092
0.971628		0.759549	1.22324
0.938293		0.918869	1.08011
1.04412		0.707342	1.00892
0.947398		0.887928	1.10906
0.905399		0.814151	0.980743
0.88338		0.799767	1.0182
0.840479		0.858933	1.14582
0.852761		0.869375	1.03456
1.26366		0.869085	0.911085
1.00791		0.86294	1.00405
0.757614		0.903784	1.29045
0.829118		0.732139	1.0028
0.842636		0.840516	0.44512
0.998872		0.729599	0.995406
0.99356		0.935724	1.35084
0.847742		0.803248	1.19369
0.891523		0.792132	1.05211
0.963823		0.979342	1.1308
0.946304		0.84685	1.11749
1.0027		0.772144	0.945515
1.12039		1.02967	1.48553
0.946409		0.905599	0.919958
0.930571		0.883895	1.05566
1.05927		0.823614	1.09922
0.978502		0.787031	1.0914
0.788848		0.647167	1.04628
0.816449		0.806455	0.962451
1.1611		0.843938	0.949398
1.1877		1.13267	1.11066
0.942544		0.759297	1.30003
0.874022		0.740807	1.19563
1.00348		0.975486	0.986894
1.0917		0.758866	1.20155
1.11038		0.812432	0.937035
1.0487		1.01417	1.09089
0.998369		1.016	1.15553
0.991691		0.89302	0.967817
0.930956		0.811032	0.515816
0.905776		0.788553	0.701517
0.922124		0.896769	1.06956
1.36077		0.839989	1.19962
0.746596		1.07292	0.9139
0.959455		0.95938	1.00893
0.886374		0.854174	1.41359
0.929037		0.828794	1.29215
0.962594		0.765829	1.23886
1.0392		0.859506	1.24116
0.984692		0.943558	0.964211
0.958005		1.33295	1.10708
1.02124		0.796061	0.968935
0.967826		0.82416	1.0171
1.01992		1.00603	1.04549
0.845319		0.796782	0.559536
0.942074		1.09365	1.46052
0.940707		0.827072	0.965753
1.0989		1.04118	0.963111
0.939328		0.782411	0.489534
1.02935		0.99219	1.06884
0.92974		0.826866	0.817551
0.920389		1.41137	1.6052
0.865909		0.938393	0.577019
1.01407		1.16331	0.528971
0.880008		1.34252	0.637582
1.11444		0.895569	0.635627
0.877082		1.31338	0.57082
0.85896		0.732472	0.619072
1.02012		0.774707	0.626105
1.10875		0.881201	0.57789
1.01651		0.813167	0.562467
1.11198		0.818633	1.21586
1.03648		0.857789	0.841568
0.935077		0.444804	1.52075
0.968502		0.950623	1.70924
1.08125		0.878447	1.02458
0.987665		0.841634	0.94583
0.831098		0.86827	1.16735
0.837574		0.898239	1.03702
0.898159		0.726827	0.955461
0.801212		0.791642	1.04829
0.923331		0.774589	1.13707
0.868962		0.901679	1.3737
0.995359		0.858649	1.25138
0.857998		0.763264	1.37117
0.821459		0.796648	1.69941
0.95155		0.768558	1.58158
0.957282		0.913265	0.967323
0.914884		0.977917	0.548447
1.00028		0.808606	0.777356
0.974941		0.796213	0.904367
0.887953		0.932625	0.878114
0.917567		1.00407	1.22487
0.916245		0.985347	1.07831
0.846195		1.0443	0.961362
0.95691		0.973249	1.14157
0.934041		0.888177	1.04118
0.938307		0.836002	1.11053
0.870303		0.797914	0.564549
0.99611		0.735523	0.92116
1.26285		0.852482	0.532403
1.04165		0.783702	1.31048
0.908627		0.795764	1.63652
1.4702		0.954009	1.04963
0.84368		0.934878	1.1188
0.918479		0.914819	1.28546
0.879618		0.878472	1.06981
1.26905		0.905236	1.00312
0.822212		0.801586	1.23263
0.837846		0.434212	1.24863
1.08734		1.08324	1.41988
1.26008		0.881459	1.36298
1.01878		0.878207	1.30404
0.963546		0.910911	1.20445
0.977135		0.818789	1.28972
0.969491		0.896334	0.655472
0.981029		0.433963	1.5257
0.977933		0.413046	1.4541
0.905256		0.903616	1.12516
0.830425		0.772629	1.28311
0.821346		0.702769	1.12734
0.992664		1.03233	1.14567
0.994247		0.827989	0.803189
0.990433		1.02057	0.895283
1.09265		0.874882	0.960258
1.02051		0.80181	1.24502
1.03821		0.761901	0.939006
1.04084		1.04876	1.00496
0.967981		0.938654	1.25527
0.981777		0.814723	0.955726
0.974837		0.782178	1.08552
0.829699		0.835396	1.16566
0.788776		0.929373	1.30412
0.897139		1.02657	1.124
0.929872		0.980988	1.07762
0.8772		0.889779	1.64661
0.903666		0.993515	1.00051
0.925277		0.945032	1.25337
0.818488		0.998174	1.24919
0.795092		0.836367	1.26005
0.981514		0.836735	1.26493
0.922335		0.887853	1.22546
0.963535		0.929362	0.995674
0.923528		0.728796	1.14301
0.886177		0.762951	1.20495
0.803035		0.774591	1.32226
0.831738		0.727711	1.00586
0.959505		0.984846	1.07498
0.796986		1.00468
0.831012		0.886751
0.847088		0.880201
0.930718		0.730556
0.969174		0.805031
0.981616		0.872382
1.00563		0.823986
0.943896		0.82984
0.959482		1.02701
0.976352		0.775362
0.92872		0.887
0.893587		0.83614
1.03172		0.914077
1.14704		0.997348
0.949915		0.751141
0.948348		0.995869
0.904388		0.814088
1.01223		0.856757
0.934739		0.880811
1.05015		1.03388
1.05214		0.802341
0.963456		1.02807
1.06223		1.01593
1.25345		0.893641
1.04353		0.951226
0.999099		0.826769
0.875095		0.920448
0.812827		0.709764
1.03791		0.805006
1.01174		0.805966
0.980922		0.700601
1.0865		0.971235
0.843491		0.82844
0.866349		1.03955
0.834129		0.85837
0.932061		0.914152
1.02032		0.783813
1.24343		0.926214
0.887232		0.817113
1.06019		0.674613
0.729769		0.69107
0.978881		0.81362
0.958312		0.875419
1.1267		0.79198
1.14484		0.906211
1.0533		0.772271
0.867855		0.87717
0.840171		0.654422
0.825331		0.77394
0.935837		0.850196
1.0225		0.766024
0.916102		0.918021
1.17732		0.861647
1.10885		0.960001
0.986114		0.904585
1.02812		0.965808
1.04078		0.860293
0.934442		0.74345
0.814507		1.04085
1.00204		0.73868
0.874301		1.01226
0.863398		1.05667
0.873687		0.896059
0.946987		0.689775
0.806043		0.940219
0.86206		0.713459
0.968123		0.835823
0.864564		1.00269
0.840125		0.938259
0.890216		0.922464
0.98989		0.824353
0.929654		1.05102
0.942347		0.860604
0.996423		0.997777
1.04484		0.841611
1.17779		0.775625
0.934542		0.861607
0.804226		0.929064
0.911947		0.727823
1.09949		0.827973
1.17439		0.716541
1.09563		0.756124
1.01048		0.802611
0.95698		0.871598
1.02415		0.821448
1.01361		0.775981
0.949378		0.975647
0.909316		0.587754
0.831055		0.71012
0.888475		1.03206
0.899763		1.09743
0.785659		1.13719
0.784539		0.837104
0.832634		0.957772
0.942653		0.744629
0.947171		0.948257
1.01779		0.853405
0.875227		0.835371
0.802092		1.08038
0.746566		0.855487
0.939557		0.997502
0.913555		0.897542
0.959611		0.804249
[truncated: 2,437 more rows]
