# Supplementary material for: The mini-IDLE 3D biomimetic culture assay enables interrogation of mechanisms governing muscle stem cell quiescence and niche repopulation
Source: eLife. 2022 Dec 20;11:e81738. doi: 10.7554/eLife.81738 (PMC9904761; doi:10.7554/eLife.81738)
Supplement: Figure 7—figure supplement 2—source data 1. — Data for subpanels separated into tabs. [file elife-81738-fig7-figsupp2-data1.xlsx]

## Sheet: Fig7. S2B
	Young	Young+wort	Aged	Aged+wort
GFP coverage/FOV	5.26074	0.71051	3.75854	3.24229
	3.64262	1.42919	6.30537	4.48727
	3.14374	0.477266	3.98784	1.20461
	7.19478	2.82014	11.6047	7.26656
	3.45414	6.40684	6.15158	0.26204
	6.57444	3.02627	7.22565	5.3339
	1.63633		3.71615	1.03897
	3.91097		5.15381
	5.99103
