# Supplementary material for: The mini-IDLE 3D biomimetic culture assay enables interrogation of mechanisms governing muscle stem cell quiescence and niche repopulation
Source: eLife. 2022 Dec 20;11:e81738. doi: 10.7554/eLife.81738 (PMC9904761; doi:10.7554/eLife.81738)
Supplement: Figure 7—source data 1. — Data for subpanels separated into tabs. [file elife-81738-fig7-data1.xlsx]

## Sheet: Fig. 7A
Days post-engraftment	Young														Young + wortmannin														Aged														Aged + wortmannin
1	4.89209	10.9353	4.41247	3.26139	4.31655	5.7554	3.93285	3.64508	4.79616						4.31655	4.60432	4.41247	4.31655	2.78177	4.1247									4.31655	7.29017	7.96163	4.79616	7.29017	2.20624	4.79616	6.13909	2.8777						7.0024	4.41247	7.57794	6.33094	6.71463	4.31655	3.16547
3	8.15348	9.78417	9.78417	6.42686	6.13909	3.83693	3.83693	4.60432	6.04317						4.41247	8.44125	3.54916	6.33094	4.60432	3.16547									8.44125	17.1703	15.2518	10.2638	8.63309	7.19424	10.3597	9.30456							9.4964	8.92086	5.94724	3.45324	5.65947	4.41247	3.06954
7	7.57794	9.40048	7.56595	4.1247	7.09832	4.89209	3.83693	4.1247	3.64508						3.83693	6.81055	4.50839	6.04317	4.70024	4.31655									4.98801	3.93285	4.1247	4.31655	2.11031	3.54916	1.247	7.29017	1.15108						5.17986	5.56355	4.41247	4.50839	5.08393	4.31655	4.79616
*values represent technical replicates from all biological replicates
[truncated: 2 more columns]

## Sheet: Fig. 7C
	Days post-engraftment
Young	1	3	7	Young+wort	1	3	7	Aged	1	3	7	Aged+wort	1	3	7
	23.5294	28.2353	5.06329		2.22222	21.7391	0		15.5556	46.5909	5.71429		8.21918	30.303	5.55556
	17.5439	14.7059	12.2449		0	23.8636	0		11.8421	45.8101	8.25688		6.52174	13.9785	12.069
	15.2174	27.451	16.7939		6.52174	24.3243	2.12766		15.6627	35.2201	1.75439		2.53165	22.5806
	2.94118	29.8507	0		13.3333	9.09091	4.7619		22	27.1028	8.88889		9.09091	13.8889	6.52174
	6.66667	35.9375	9.45946		6.89655	18.75	8.16327		28.9474	28.8889	4.54545		14.2857	15.2542	6.38298
	1.66667	32.5	9.80392		9.30233	18.1818	2.22222		4.34783	36	5.40541		13.3333	17.3913	1.88679
	12.1951	25	7.5						18	34.6154	15.3846		6.06061	18.75	0
	7.89474	14.5833	9.30233						4.6875	49.4845	7.89474		0	6.55738	10
	14	20.6349	5.26316						20		8.33333		5	19.2308
*values represent technical replicates from all biological replicates

## Sheet: Fig. 7D
	Days post-engraftment
Young	1	3	7	Young+wort	1	3	7	Aged	1	3	7	Aged+wort	1	3	7
	95.8593	43.3962	12.6263		89.0486	21.0526	2.44361		84.0909	63.1148	16.3934		98.0392	32.5581	5.7971
	86.0286	40.9091	4.28571		90.9548	22.3529	2.8169		89.2453	52.1053	5.7971		90.9091	46.5347	15.3846
	79.9583	55.9684	6.96494		84.9568	26.0689	2.47148		85.2941	64.6552	7		76.3636	43.0233	14.6341
	84.9573	45.0385	9.0583		80.0589	38.0688	5.30573		82.3077	46.4286	11.976		84.5969	39.7059	5.92885
	88.9475	49.9573	7.04895		92.9584	32.9583	4.06849		67.0455	68.4211	4.04281		92.4958	53.8462	0.59761
	79.0549	36.0285								62.7119	11.6883			39.0568	5.06912
										63.6364	7.27273
										58.9744	21.4286
											21.4286
											25.3165
*values represent technical replicates from all biological replicates

## Sheet: Fig. 7E
	Max/min feret diameter	Eccentricity		Max/min feret diameter	Eccentricity		Max/min feret diameter	Eccentricity		Max/min feret diameter	Eccentricity
Young	3.5456	0.852777	Young+wort	3.48493	0.815877	Aged	2.80124	0.772424	Aged+wort	3.68695	0.872365
	3.64832	0.832886		4.05895	0.899184		3.02533	0.797985		2.61732	0.724228
	3.78149	0.838526		3.73178	0.820274		2.36718	0.748147		2.44992	0.81642
	3.20984	0.815663		3.82314	0.825439		3.5701	0.793795		3.47563	0.836565
	4.16937	0.88393		4.48902	0.826359		2.84147	0.822505		3.08141	0.887115
	4.00997	0.816194		3.02996	0.849221		2.70669	0.771057		3.11584	0.862833
	4.29484	0.908404					3.03381	0.704823		3.71636	0.872577
	3.50594	0.860593					3.6767	0.786039		3.02224	0.84649
	4.49698	0.910498					2.66897	0.825692		3.09989	0.824908
*values represent technical replicates from all biological replicates

## Sheet: Fig. 7F
	Young	Young+wort	Aged	Aged+wort
Max/min feret diameter	3.5456	3.48493	2.80124	3.68695
	3.64832	4.05895	3.02533	2.61732
	3.78149	3.73178	2.36718	2.44992
	3.20984	3.82314	3.5701	3.47563
	4.16937	4.48902	2.84147	3.08141
	4.00997	3.02996	2.70669	3.11584
	4.29484		3.03381	3.71636
	3.50594		3.6767	3.02224
	4.49698		2.66897	3.09989
*values represent technical replicates from all biological replicates

## Sheet: Fig. 7G
	Young	Young+wort	Aged	Aged+wort
Max/min feret diameter	0.852777	0.815877	0.772424	0.872365
	0.832886	0.899184	0.797985	0.724228
	0.838526	0.820274	0.748147	0.81642
	0.815663	0.825439	0.793795	0.836565
	0.88393	0.826359	0.822505	0.887115
	0.816194	0.849221	0.771057	0.862833
	0.908404		0.704823	0.872577
	0.860593		0.786039	0.84649
	0.910498		0.825692	0.824908
*values represent technical replicates from all biological replicates
